# Supplementary material for: Negative correlation of single-cell PAX3:FOXO1 expression with tumorigenicity in rhabdomyosarcoma
Source: Life Sci Alliance. 2021 Jun 29;4(9):e202001002. doi: 10.26508/lsa.202001002 (PMC8321661; doi:10.26508/lsa.202001002)
Supplement: Supplementary file 2 [file LSA-2020-01002_TableS2.xlsx]

## Sheet: Table S2
	Table S2. Limiting dilution transplantation of YFPhigh/ P3Fhigh and YFPlow/ P3Flow mouse U23674 cells.
	Cell type	# cells injected	# injected mice	# mice developing tumor	latency (days)
	YFP low	1	4	0	-
	YFP low	10	3	1	63
	YFP low	50	4	2	33-70
	YFP low	100	4	3	31-89
	YFP low	500	4	4	31-48
	YFP low	1000	4	4	24-38
	YFP low	5000	4	4	24-28
	YFP high	1	4	0	-
	YFP high	10	4	0	-
	YFP high	50	4	1	63
	YFP high	100	4	0	-
	YFP high	500	4	0	-
	YFP high	1000	4	1	48
	YFP high	5000	4	1	31
