# Supplementary material for: Negative correlation of single-cell PAX3:FOXO1 expression with tumorigenicity in rhabdomyosarcoma
Source: Life Sci Alliance. 2021 Jun 29;4(9):e202001002. doi: 10.26508/lsa.202001002 (PMC8321661; doi:10.26508/lsa.202001002)
Supplement: Supplementary file 6 [file LSA-2020-01002_TableS6.xlsx]

## Sheet: Table S6
	Table S6. Genes with stronger ATAC-Seq signals in YFPhigh/ P3Fhigh U23674 cells.
	PeakID	Chromosome	Start	End	Strand	Peak Score	Focus Ratio/Region Size	Detailed Annotation	Distance to TSS	Nearest PromoterID	Gene Name
	chr8-7	chr8	72712720	72712870	+	60.8	0	3' UTR (NM_176940, exon 19 of 19)	-10475	NM_001113248	Sin3b
	chr8-18	chr8	66787895	66788045	+	55.5	0	MIR|SINE|MIR	-72247	NM_001163564	Naf1
	chr8-24	chr8	114262359	114262509	+	50.5	0	intron (NM_173016, intron 3 of 8)	56794	NM_173016	Vat1l
	chr8-21	chr8	54548415	54548565	+	49.7	0	Intergenic	-1841	NM_029569	Asb5
	chr3-59	chr3	158298842	158298992	+	48.2	0	L1M5|LINE|L1	262235	NM_001289524	Lrrc40
	chr3-50	chr3	68630609	68630759	+	47.8	0	Intergenic	58316	NM_013928	Schip1
	chr3-55	chr3	9339775	9339925	+	45.5	0	Intergenic	-63228	NR_015499	C030034L19Rik
	chr1-43	chr1	57244048	57244198	+	44	0	Intergenic	-29127	NR_037990	BC055402
	chr14-15	chr14	121112297	121112447	+	41.7	0	intron (NM_134082, intron 2 of 26)	76798	NM_134082	Farp1
	chr8-63	chr8	41124617	41124767	+	41.7	0	intron (NM_001005863, intron 1 of 13)	9034	NM_001005863	Mtus1
	chr8-72	chr8	66758032	66758182	+	39.4	0	Intergenic	60685	NM_010934	Npy1r
	chr16-41	chr16	18471758	18471908	+	38.6	0	intron (NM_013711, intron 12 of 17)	-26880	NM_001081682	Gnb1l
	chr13-62	chr13	71000495	71000645	+	37.9	0	Intergenic	-106519	NR_130325	Mir466f-4
	chr3-97	chr3	157695540	157695690	+	37.5	0	Intergenic	128723	NM_011196	Ptger3
	chr2-59	chr2	20642918	20643068	+	37.5	0	intron (NM_029895, intron 3 of 18)	123480	NM_001177631	Etl4
	chr6-69	chr6	126560063	126560213	+	37.1	0	Intergenic	-24583	NM_145983	Kcna5
	chr8-90	chr8	66788341	66788491	+	36.7	0	Intergenic	-71801	NM_001163564	Naf1
	chr3-159	chr3	121289564	121289714	+	36.3	0	Intergenic	-2178	NM_024178	Alg14
	chr14-28	chr14	20201217	20201367	+	36.3	0	Intergenic	-19510	NM_021542	Kcnk5
	chr1-63	chr1	45587775	45587925	+	36.3	0	Intergenic	-84568	NM_007737	Col5a2
	chr8-75	chr8	31301161	31301311	+	36.3	0	Intergenic	-66513	NR_046272	7420700N18Rik
	chr3-117	chr3	105719786	105719936	+	36	0	3' UTR (NM_001163356, exon 2 of 2)	14403	NM_001163356	Fam212b
	chr8-62	chr8	11459163	11459313	+	36	0	intron (NM_011227, intron 1 of 1)	-18691	NR_126558	E230013L22Rik
	chr13-44	chr13	81755061	81755211	+	35.6	0	ORR1D1-int|LTR|ERVL-MaLR	-28156	NM_007684	Cetn3
	chr1-93	chr1	138515497	138515647	+	35.6	0	intron (NM_021605, intron 7 of 9)	104185	NM_021605	Nek7
	chr3-124	chr3	41318401	41318551	+	35.6	0	Intergenic	174723	NR_040385	Platr4
	chr13-48	chr13	18301523	18301673	+	35.2	0	intron (NM_175006, intron 2 of 7)	80441	NM_175006	Pou6f2
	chr9-45	chr9	15185535	15185685	+	35.2	0	Intergenic	-53435	NM_026955	Vstm5
	chr17-64	chr17	3432937	3433087	+	34.8	0	intron (NM_001122998, intron 6 of 26)	35805	NM_011878	Tiam2
	chr8-104	chr8	35773553	35773703	+	34.8	0	Intergenic	52931	NM_027998	Cldn23
	chr2-110	chr2	4541911	4542061	+	34.8	0	intron (NM_001347086, intron 12 of 24)	-17768	NM_001177844	Frmd4a
	chr3-128	chr3	115646994	115647144	+	34.4	0	Intergenic	67986	NM_007901	S1pr1
	chr15-53	chr15	25445776	25445926	+	34.4	0	intron (NR_027376, intron 1 of 1)	31659	NR_027376	Gm5468
	chr3-138	chr3	9795547	9795697	+	34.4	0	intron (NM_001195031, intron 1 of 8)	38057	NM_053182	Pag1
	chr13-51	chr13	63113214	63113364	+	34	0	intron (NM_001289926, intron 5 of 15)	-126740	NR_110520	2010111I01Rik
	chr3-166	chr3	121395785	121395935	+	34	0	MLT1H|LTR|ERVL-MaLR	-30681	NM_028044	Cnn3
	chr11-27	chr11	51823415	51823565	+	34	0	intron (NM_199299, intron 9 of 11)	33991	NM_199299	Jade2
	chr8-114	chr8	78625310	78625460	+	33.7	0	intron (NM_001009981, intron 5 of 10)	116057	NM_001282108	Slc10a7
	chr16-55	chr16	8513364	8513514	+	33.7	0	promoter-TSS (NM_001170978)	10	NM_172961	Abat
	chr8-110	chr8	104242973	104243123	+	33.7	0	Tigger5b|DNA|TcMar-Tigger	5510	NR_045642	Tk2
	chr14-33	chr14	48452192	48452342	+	33.3	0	intron (NR_132324, intron 3 of 13)	5915	NR_132324	Tmem260
	chr8-85	chr8	67729192	67729342	+	33.3	0	intron (NM_030263, intron 9 of 12)	89028	NM_027626	Psd3
	chr2-113	chr2	146443362	146443512	+	33.3	0	ORR1F|LTR|ERVL-MaLR	68567	NM_001033348	Ralgapa2
	chr13-59	chr13	15179169	15179319	+	33.3	0	Intergenic	-284479	NM_008130	Gli3
	chr3-160	chr3	9034190	9034340	+	33.3	0	Intergenic	-27699	NR_040597	4930539M17Rik
	chr8-108	chr8	44911674	44911824	+	33.3	0	Intergenic	-38459	NM_001081286	Fat1
	chr2-151	chr2	110192766	110192916	+	33.3	0	Intergenic	112884	NM_130452	Bbox1
	chr6-80	chr6	50836362	50836512	+	32.9	0	Intergenic	60322	NR_045984	C530044C16Rik
	chr8-118	chr8	44093525	44093675	+	32.9	0	Intergenic	-394109	NM_001079931	Gm5347
	chr17-65	chr17	35590668	35590818	+	32.9	0	MER104|DNA|TcMar-Tc2	23258	NM_175148	2300002M23Rik
	chr3-162	chr3	51739420	51739570	+	32.9	0	intron (NM_001004176, intron 2 of 4)	78316	NM_001310482	Mgst2
	chr3-189	chr3	60270832	60270982	+	32.5	0	Intergenic	189038	NM_032400	Sucnr1
	chr8-117	chr8	27058340	27058490	+	32.5	0	Intergenic	15860	NM_054057	Prosc
	chr3-174	chr3	139073931	139074081	+	32.5	0	intron (NM_145544, intron 1 of 13)	1195	NM_145544	Rap1gds1
	chr3-175	chr3	11562975	11563125	+	32.5	0	Intergenic	281309	NR_040751	Gm10745
	chr5-47	chr5	105573074	105573224	+	32.1	0	intron (NM_133897, intron 2 of 3)	53678	NM_133897	Lrrc8c
	chr19-36	chr19	43579312	43579462	+	31.7	0	MIRc|SINE|MIR	-32938	NM_008699	Nkx2-3
	chr1-149	chr1	118335423	118335573	+	31.7	0	Intergenic	13655	NM_026472	Nifk
	chr8-121	chr8	118350041	118350191	+	31.4	0	intron (NM_019707, intron 1 of 13)	66505	NM_019707	Cdh13
	chr2-137	chr2	35652945	35653095	+	31.4	0	intron (NM_001290641, intron 2 of 15)	31039	NM_001114124	Dab2ip
	chr1-114	chr1	19970037	19970187	+	31	0	Intergenic	-386342	NR_045734	4930486I03Rik
	chr9-52	chr9	37232535	37232685	+	31	0	intron (NM_020258, intron 17 of 17)	23128	NM_020258	Slc37a2
	chr3-172	chr3	121593613	121593763	+	31	0	Intergenic	49797	NR_036456	A730020M07Rik
	chr6-102	chr6	108494286	108494436	+	31	0	intron (NM_010585, intron 52 of 61)	4618	NR_106121	Mir7661
	chr1-115	chr1	67872362	67872512	+	30.6	0	Intergenic	749410	NM_001080809	Cps1
	chr5-53	chr5	44943268	44943418	+	30.6	0	Intergenic	-22858	NR_073013	4930431F12Rik
	chr13-79	chr13	7373281	7373431	+	30.6	0	MTE2a|LTR|ERVL-MaLR	-724585	NM_001291071	Pfkp
	chr4-17	chr4	96725774	96725924	+	30.2	0	intron (NM_001081284, intron 10 of 10)	59311	NM_001081284	Gm12695
	chr1-137	chr1	189238223	189238373	+	30.2	0	intron (NM_001159850, intron 6 of 6)	105055	NM_001159850	Kcnk2
	chr2-139	chr2	135824992	135825142	+	30.2	0	intron (NM_013829, intron 2 of 36)	83237	NM_013829	Plcb4
	chr1-116	chr1	78338419	78338569	+	30.2	0	Plat_L3|LINE|CR1	28148	NM_001004173	Sgpp2
	chr8-159	chr8	77262439	77262589	+	30.2	0	ORR1D1|LTR|ERVL-MaLR	-254542	NR_028125	0610038B21Rik
	chr19-51	chr19	52355503	52355653	+	29.8	0	Intergenic	91281	NM_008386	Ins1
	chr3-212	chr3	9297635	9297785	+	29.8	0	Intergenic	47143	NM_177660	Zbtb10
	chr12-28	chr12	15801011	15801161	+	29.8	0	promoter-TSS (NR_105809)	15	NR_105809	Mir6387
	chr16-80	chr16	18462011	18462161	+	29.8	0	intron (NM_013711, intron 11 of 17)	-35370	NM_001111062	Comt
	chr7-38	chr7	39820697	39820847	+	29.8	0	Intergenic	303006	NM_001004139	Zfp619
	chr3-219	chr3	22079654	22079804	+	29.8	0	intron (NM_030732, intron 1 of 15)	3077	NM_030732	Tbl1xr1
	chr19-37	chr19	42405988	42406138	+	29.8	0	MLT1D|LTR|ERVL-MaLR	25720	NM_145123	Crtac1
	chr15-67	chr15	13246285	13246435	+	29.8	0	Intergenic	-72685	NM_007666	Cdh6
	chr19-49	chr19	47442124	47442274	+	29.8	0	intron (NM_001164717, intron 1 of 13)	22212	NM_001164717	Sh3pxd2a
	chr17-88	chr17	34755764	34755914	+	29.5	0	MMERGLN-int|LTR|ERV1	-11942	NM_009780	C4b
	chr3-214	chr3	65365296	65365446	+	29.5	0	intron (NM_010597, intron 12 of 13)	-15942	NR_040390	A730090N16Rik
	chr6-141	chr6	140208353	140208503	+	29.5	0	AmnSINE1|SINE|Deu	166903	NM_007605	Capza3
	chr3-209	chr3	122438383	122438533	+	29.5	0	intron (NM_013867, intron 2 of 11)	18678	NM_013867	Bcar3
	chr3-205	chr3	58658610	58658760	+	29.5	0	Intergenic	6643	NR_004433	Gm8234
	chr2-126	chr2	6350397	6350547	+	29.5	0	intron (NM_001080548, intron 2 of 14)	-2264	NM_181399	Usp6nl
	chr6-111	chr6	4993948	4994098	+	29.1	0	intron (NM_181595, intron 2 of 15)	90703	NM_181595	Ppp1r9a
	chr14-49	chr14	14639241	14639391	+	29.1	0	Intergenic	-63709	NM_001033270	Slc4a7
	chr2-165	chr2	6359832	6359982	+	29.1	0	intron (NM_181399, intron 1 of 13)	7171	NM_181399	Usp6nl
	chr6-127	chr6	72681101	72681251	+	29.1	0	intron (NM_001079822, intron 3 of 12)	51345	NR_040421	Gm15401
	chr10-40	chr10	99383138	99383288	+	29.1	0	Intergenic	119982	NM_026268	Dusp6
	chr1-146	chr1	21428081	21428231	+	29.1	0	intron (NM_001310477, intron 9 of 12)	44600	NM_001113187	Khdc1b
	chr14-44	chr14	51893308	51893458	+	28.7	0	promoter-TSS (NM_001039676)	-227	NM_001039676	Slc39a2
	chr6-116	chr6	22019729	22019879	+	28.7	0	intron (NM_001081351, intron 2 of 21)	33894	NM_001081351	Cped1
	chr3-273	chr3	41318850	41319000	+	28.7	0	Intergenic	174274	NR_040385	Platr4
	chr2-148	chr2	60694725	60694875	+	28.7	0	intron (NM_001159564, intron 1 of 17)	-21107	NM_021359	Itgb6
	chr5-71	chr5	66098224	66098374	+	28.3	0	promoter-TSS (NM_139065)	-120	NM_139065	Rbm47
	chr16-103	chr16	87032024	87032174	+	28.3	0	Intergenic	-322086	NM_001159331	N6amt1
	chr1-153	chr1	10004328	10004478	+	28.3	0	intron (NR_110971, intron 1 of 6)	4733	NR_110971	Ppp1r42
	chr3-254	chr3	98024335	98024485	+	28.3	0	intron (NM_010928, intron 1 of 33)	10872	NM_010928	Notch2
	chr2-159	chr2	110080663	110080813	+	28.3	0	Intergenic	-30259	NR_040508	Ccdc34os
	chr3-251	chr3	52070023	52070173	+	27.9	0	AmnSINE1|SINE|Deu	34908	NM_001004176	Maml3
	chr9-65	chr9	31656779	31656929	+	27.9	0	MIR|SINE|MIR	-192616	NM_144936	Tmem45b
	chr1-171	chr1	20872673	20872823	+	27.9	0	MIRb|SINE|MIR	17725	NR_040492	6720483E21Rik
	chr3-243	chr3	19233768	19233918	+	27.5	0	intron (NM_001122759, intron 7 of 12)	31165	NM_008802	Pde7a
	chr6-133	chr6	22019271	22019421	+	27.5	0	intron (NM_001081351, intron 2 of 21)	33436	NM_001081351	Cped1
	chr5-91	chr5	12040422	12040572	+	27.5	0	Intergenic	122454	NM_001177510	4933402N22Rik
	chr8-186	chr8	48825786	48825936	+	27.5	0	Intergenic	-151171	NM_011857	Tenm3
	chr18-26	chr18	23896853	23897003	+	27.5	0	Intergenic	-57760	NM_027007	Zfp397
	chr1-185	chr1	168356267	168356417	+	27.5	0	intron (NM_008783, intron 2 of 7)	75827	NM_001291508	Pbx1
	chr3-256	chr3	108831800	108831950	+	27.5	0	intron (NM_011504, intron 1 of 18)	8627	NM_011504	Stxbp3
	chr3-265	chr3	68403481	68403631	+	27.5	0	intron (NM_001113420, intron 1 of 6)	-64627	NM_001282045	Schip1
	chr5-70	chr5	51471690	51471840	+	27.5	0	MER117|DNA|hAT-Charlie	82156	NR_027710	Ppargc1a
	chr6-131	chr6	133976932	133977082	+	27.5	0	Intergenic	-58693	NM_001303102	Etv6
	chr8-154	chr8	40896410	40896560	+	27.5	0	intron (NM_007514, intron 1 of 11)	-29748	NM_026840	Pdgfrl
	chr13-112	chr13	51022976	51023126	+	27.5	0	Intergenic	77676	NR_029463	9430083A17Rik
	chr1-193	chr1	53940401	53940551	+	27.5	0	intron (NM_001001883, intron 4 of 28)	91052	NR_106149	Mir7681
	chr5-73	chr5	86722959	86723109	+	27.5	0	intron (NM_172880, intron 3 of 9)	22773	NM_172880	Tmprss11e
	chr13-137	chr13	7373742	7373892	+	27.2	0	Intergenic	-725046	NM_001291071	Pfkp
	chr15-103	chr15	13470770	13470920	+	27.2	0	Intergenic	-297170	NM_007666	Cdh6
	chr1-184	chr1	138579611	138579761	+	27.2	0	intron (NM_001311148, intron 1 of 7)	40071	NM_021605	Nek7
	chr3-316	chr3	68610954	68611104	+	27.2	0	intron (NM_001113419, intron 6 of 10)	38661	NM_013928	Schip1
	chr1-187	chr1	82189737	82189887	+	26.8	0	Intergenic	57896	NR_105762	Mir6344
	chr12-45	chr12	117486503	117486653	+	26.8	0	Intergenic	-29901	NM_175930	Rapgef5
	chr3-284	chr3	41242044	41242194	+	26.8	0	Intergenic	-159073	NM_027558	Pgrmc2
	chr6-158	chr6	30360133	30360283	+	26.8	0	Intergenic	30802	NM_172735	Zc3hc1
	chr6-162	chr6	124311595	124311745	+	26.8	0	exon (NM_001170395, exon 5 of 17)	7019	NM_053094	Cd163
	chr7-61	chr7	74372176	74372326	+	26.8	0	L3b|LINE|CR1	182529	NM_023908	Slco3a1
	chr19-71	chr19	48009349	48009499	+	26.8	0	intron (NM_001163267, intron 15 of 17)	71712	NM_001163267	Cfap58
	chr4-28	chr4	144988816	144988966	+	26.4	0	intron (NM_001276502, intron 66 of 68)	95754	NM_011303	Dhrs3
	chr19-75	chr19	40995528	40995678	+	26.4	0	Intergenic	-1068	NM_008528	Blnk
	chr17-124	chr17	47483643	47483793	+	26.4	0	Intergenic	18569	NM_022015	Taf8
	chr11-84	chr11	12171265	12171415	+	26.4	0	Intergenic	-133920	NM_010345	Grb10
	chr2-221	chr2	77130857	77131007	+	26.4	0	intron (NM_001025576, intron 3 of 23)	39703	NM_001025576	Ccdc141
	chr16-119	chr16	49358013	49358163	+	26.4	0	MIRc|SINE|MIR	300602	NM_001166210	Myh15
	chr17-109	chr17	65961736	65961886	+	26.4	0	Intergenic	-10624	NM_023053	Twsg1
	chr8-185	chr8	35616013	35616163	+	26.4	0	intron (NM_001081279, intron 1 of 2)	-27068	NR_040376	Gm16793
	chr6-144	chr6	108318397	108318547	+	26.4	0	intron (NM_010585, intron 4 of 61)	105376	NM_010585	Itpr1
	chr10-43	chr10	56985730	56985880	+	26.4	0	Intergenic	500548	NR_045353	4930467K11Rik
	chr8-199	chr8	22593930	22594080	+	26.4	0	promoter-TSS (NM_001198998)	-192	NM_011696	Vdac3
	chr2-250	chr2	22671448	22671598	+	26.4	0	intron (NM_008078, intron 11 of 15)	17240	NR_039548	Mir3967
	chr17-127	chr17	15153403	15153553	+	26.4	0	Intergenic	87305	NR_046164	Gm5091
	chr19-110	chr19	29292714	29292864	+	26.4	0	Lx8|LINE|L1	32529	NM_013754	Insl6
	chr18-27	chr18	31942746	31942896	+	26.4	0	TTS (NM_001025381)	6815	NM_001025381	Gpr17
	chr8-231	chr8	57955670	57955820	+	26	0	intron (NM_175032, intron 6 of 11)	-302690	NM_144731	Galnt7
	chr1-203	chr1	166844615	166844765	+	26	0	Intergenic	155040	NR_037988	Gm16701
	chr16-123	chr16	18460114	18460264	+	26	0	intron (NM_013711, intron 11 of 17)	-33473	NM_001111062	Comt
	chr15-112	chr15	57847996	57848146	+	26	0	MIRb|SINE|MIR	44347	NM_024207	Derl1
	chr2-288	chr2	105312190	105312340	+	26	0	intron (NM_001159638, intron 2 of 2)	87054	NM_009037	Rcn1
	chr1-190	chr1	180195283	180195433	+	26	0	intron (NM_023341, intron 1 of 14)	662	NM_023341	Coq8a
	chr1-200	chr1	84839447	84839597	+	26	0	promoter-TSS (NM_025386)	-218	NM_133975	Trip12
	chr6-160	chr6	100939210	100939360	+	26	0	MLT1G1|LTR|ERVL-MaLR	105647	NM_182939	Ppp4r2
	chr16-126	chr16	66001261	66001411	+	26	0	Intergenic	185703	NM_028572	Vgll3
	chr1-226	chr1	194756973	194757123	+	26	0	intron (NM_008882, intron 9 of 31)	137219	NM_008882	Plxna2
	chr19-69	chr19	47368715	47368865	+	26	0	RMER15|LTR|ERVL	-95201	NR_105961	Mir6995
	chr2-255	chr2	109510651	109510801	+	26	0	Intergenic	-163974	NM_007540	Bdnf
	chr4-31	chr4	145000109	145000259	+	26	0	intron (NM_001276502, intron 66 of 68)	107047	NM_011303	Dhrs3
	chr6-167	chr6	28345400	28345550	+	26	0	Intergenic	76249	NM_028900	Gcc1
	chr8-215	chr8	26815113	26815263	+	25.6	0	non-coding (NR_045904, exon 2 of 3)	9235	NR_045904	2310008N11Rik
	chr1-225	chr1	194482433	194482583	+	25.6	0	Intergenic	-137321	NM_008882	Plxna2
	chr3-236	chr3	57470435	57470585	+	25.6	0	MIRb|SINE|MIR	45100	NM_145539	Tm4sf4
	chr6-155	chr6	94555413	94555563	+	25.6	0	ORR1G|LTR|ERVL-MaLR	50927	NR_106008	Mir7041
	chr3-272	chr3	20661983	20662133	+	25.6	0	Intergenic	-294881	NM_175086	Agtr1b
	chr12-66	chr12	88967471	88967621	+	25.6	0	RLTR30D2_MM|LTR|ERV1	14156	NM_172544	Nrxn3
	chr6-178	chr6	64598321	64598471	+	25.6	0	intron (NM_008167, intron 14 of 15)	-130750	NM_007500	Atoh1
	chr15-107	chr15	39929365	39929515	+	25.6	0	L1MB7|LINE|L1	14317	NM_172814	Lrp12
	chr17-118	chr17	35302016	35302166	+	25.6	0	Intergenic	-18467	NM_010390	H2-Q1
	chr8-213	chr8	122281914	122282064	+	25.6	0	promoter-TSS (NM_009569)	-152	NM_009569	Zfpm1
	chr17-120	chr17	75305109	75305259	+	25.6	0	intron (NM_206958, intron 15 of 29)	126403	NM_001331235	Ltbp1
	chr10-60	chr10	90600264	90600414	+	25.2	0	intron (NM_001177396, intron 1 of 11)	23648	NM_181398	Anks1b
	chr4-34	chr4	10920196	10920346	+	25.2	0	LTR85b|LTR|Gypsy?	45773	NM_026005	2610301B20Rik
	chr16-130	chr16	63928359	63928509	+	25.2	0	LTR52-int|LTR|ERVL	-64277	NM_010140	Epha3
	chr6-166	chr6	22079010	22079160	+	25.2	0	intron (NM_001081351, intron 4 of 21)	93175	NM_001081351	Cped1
	chr3-307	chr3	146154252	146154402	+	25.2	0	intron (NM_001005846, intron 1 of 13)	4153	NM_001005846	Mcoln2
	chr1-206	chr1	28565824	28565974	+	25.2	0	Intergenic	214353	NM_001013750	Gm597
	chr8-219	chr8	71405913	71406063	+	25.2	0	promoter-TSS (NM_172756)	-24	NM_001310502	Ankle1
	chr16-146	chr16	50783886	50784036	+	25.2	0	non-coding (NR_131006, exon 2 of 2)	552	NR_131005	1700116B05Rik
	chr3-297	chr3	88685660	88685810	+	25.2	0	promoter-TSS (NM_028814)	-59	NM_028814	2810403A07Rik
	chr2-355	chr2	109140419	109140569	+	25.2	0	MLT2C1|LTR|ERVL	137796	NM_029790	Mettl15
	chr1-205	chr1	16626235	16626385	+	25.2	0	Intergenic	-6972	NM_001271017	Ube2w
	chr13-145	chr13	94608562	94608712	+	25.2	0	Intergenic	-180306	NM_009321	Tbca
	chr1-183	chr1	136140343	136140493	+	25.2	0	CpG	9017	NM_001039472	Kif21b
	chr8-237	chr8	111902230	111902380	+	24.9	0	intron (NM_019950, intron 1 of 1)	7894	NM_019950	Chst5
	chr3-327	chr3	31160141	31160291	+	24.9	0	intron (NM_008770, intron 2 of 2)	10296	NM_008770	Cldn11
	chr3-363	chr3	102151925	102152075	+	24.9	0	Intergenic	52693	NM_177545	Vangl1
	chr16-109	chr16	84378586	84378736	+	24.9	0	Intergenic	7518	NR_040567	4930553E22Rik
	chr8-216	chr8	60635054	60635204	+	24.9	0	intron (NM_001293769, intron 1 of 1)	2304	NM_001293769	Mfap3l
	chr16-144	chr16	44104474	44104624	+	24.9	0	intron (NM_007508, intron 8 of 14)	34470	NM_007508	Atp6v1a
	chr7-83	chr7	37902339	37902489	+	24.9	0	HAL1|LINE|L1	117138	NM_011274	Uri1
	chr1-233	chr1	121379535	121379685	+	24.9	0	Intergenic	-47021	NM_178082	Insig2
	chr6-210	chr6	127497091	127497241	+	24.9	0	Intergenic	43443	NM_181402	Parp11
	chr16-138	chr16	57407338	57407488	+	24.9	0	intron (NM_001040397, intron 1 of 4)	54136	NM_001040397	Filip1l
	chr17-150	chr17	75178523	75178673	+	24.9	0	promoter-TSS (NM_001331237)	-183	NM_001331236	Ltbp1
	chr8-226	chr8	118379216	118379366	+	24.9	0	intron (NM_019707, intron 1 of 13)	95680	NM_019707	Cdh13
	chr3-314	chr3	59229011	59229161	+	24.9	0	intron (NM_177855, intron 16 of 43)	-18204	NM_028808	P2ry13
	chr8-217	chr8	60655112	60655262	+	24.9	0	promoter-TSS (NM_001177882)	83	NM_001177881	Mfap3l
	chr7-86	chr7	19956424	19956574	+	24.9	0	Intergenic	-5756	NM_027308	Igsf23
	chr1-222	chr1	156639566	156639716	+	24.9	0	intron (NM_001136104, intron 10 of 12)	34698	NM_023141	Tor3a
	chr1-238	chr1	171193144	171193294	+	24.9	0	intron (NM_025557, intron 1 of 2)	3049	NM_025557	Pcp4l1
	chr3-354	chr3	60812030	60812180	+	24.9	0	Intergenic	-190680	NM_008772	P2ry1
	chr1-207	chr1	34190411	34190561	+	24.9	0	exon (NM_134448, exon 36 of 98)	30156	NM_010081	Dst
	chr3-315	chr3	68432052	68432202	+	24.9	0	intron (NM_001113420, intron 1 of 6)	-36056	NM_001282045	Schip1
	chr15-121	chr15	25957284	25957434	+	24.9	0	intron (NM_001277317, intron 1 of 6)	9132	NR_106071	Mir7212
	chr8-222	chr8	10935466	10935616	+	24.5	0	Intergenic	-7084	NR_135302	3930402G23Rik
	chr3-331	chr3	68597083	68597233	+	24.5	0	intron (NM_001113419, intron 6 of 10)	24790	NM_013928	Schip1
	chr9-101	chr9	35372397	35372547	+	24.5	0	Intergenic	-79604	NM_021339	Cdon
	chr5-124	chr5	96834411	96834561	+	24.5	0	intron (NM_013470, intron 10 of 12)	41101	NM_013470	Anxa3
	chr3-344	chr3	97831684	97831834	+	24.5	0	intron (NM_001039376, intron 3 of 46)	56948	NM_001289702	Pde4dip
	chr3-357	chr3	69754199	69754349	+	24.5	0	Intergenic	32219	NM_133787	Nmd3
	chr1-235	chr1	135731967	135732117	+	24.5	0	intron (NM_007791, intron 1 of 5)	2845	NM_007791	Csrp1
	chr13-182	chr13	18575612	18575762	+	24.5	0	L2|LINE|L2	-141605	NM_172120	Vps41
	chr3-358	chr3	84740348	84740498	+	24.5	0	Intergenic	74231	NM_177260	Tmem154
	chr14-82	chr14	105732696	105732846	+	24.5	0	Intergenic	-109001	NR_105814	Mir6390
	chr2-319	chr2	161379368	161379518	+	24.5	0	Intergenic	-270357	NR_126509	Chd6
	chr7-68	chr7	73921277	73921427	+	24.5	0	Intergenic	92330	NM_009181	St8sia2
	chr2-296	chr2	167833600	167833750	+	24.5	0	Intergenic	-98652	NM_011201	Ptpn1
	chr15-136	chr15	97178362	97178512	+	24.5	0	Intergenic	-68670	NM_172293	Pced1b
	chr3-340	chr3	41353792	41353942	+	24.5	0	Intergenic	139332	NR_040385	Platr4
	chr6-204	chr6	93757894	93758044	+	24.5	0	intron (NM_001083321, intron 7 of 21)	154994	NR_104594	Magi1
	chr9-108	chr9	30649872	30650022	+	24.5	0	Intergenic	222618	NM_028874	Snx19
	chr17-163	chr17	45247820	45247970	+	24.5	0	Intergenic	185812	NM_152810	Cdc5l
	chr3-295	chr3	84973607	84973757	+	24.5	0	intron (NM_001177773, intron 11 of 13)	21471	NM_080428	Fbxw7
	chr8-244	chr8	104242254	104242404	+	24.5	0	MIRb|SINE|MIR	6229	NR_045642	Tk2
	chr1-255	chr1	93656837	93656987	+	24.1	0	Intergenic	-21185	NM_021537	Stk25
	chr8-261	chr8	94322208	94322358	+	24.1	0	Intergenic	-2028	NR_029552	Mir138-2
	chr17-142	chr17	47688039	47688189	+	24.1	0	TTS (NM_001290337)	272	NM_025365	Tomm6
	chr11-92	chr11	12210884	12211034	+	24.1	0	Intergenic	-173539	NM_010345	Grb10
	chr19-115	chr19	16960374	16960524	+	24.1	0	intron (NM_181348, intron 1 of 19)	4331	NM_181348	Prune2
	chr3-308	chr3	9886963	9887113	+	24.1	0	Intergenic	-53359	NM_001195031	Pag1
	chr2-313	chr2	68978337	68978487	+	24.1	0	intron (NM_172856, intron 3 of 9)	116971	NM_001347161	Cers6
	chr2-279	chr2	167271344	167271494	+	24.1	0	Intergenic	-30882	NM_008968	Ptgis
	chr2-301	chr2	105710596	105710746	+	24.1	0	MLT1J|LTR|ERVL-MaLR	28208	NM_001310145	Pax6
	chr3-383	chr3	137288698	137288848	+	24.1	0	Lx8|LINE|L1	-52305	NM_001163522	Emcn
	chr14-84	chr14	120758580	120758730	+	24.1	0	Charlie29a|DNA|hAT-Charlie	-152539	NM_023579	Ipo5
	chr19-83	chr19	34714277	34714427	+	24.1	0	intron (NM_172838, intron 1 of 6)	32759	NM_172838	Slc16a12
	chr12-70	chr12	74116892	74117042	+	24.1	0	intron (NM_172804, intron 1 of 6)	119206	NM_172804	Syt16
	chr2-346	chr2	157791750	157791900	+	24.1	0	intron (NM_025680, intron 4 of 15)	54424	NM_025680	Ctnnbl1
	chr14-95	chr14	84928103	84928253	+	23.7	0	Intergenic	-451754	NR_015539	9630013A20Rik
	chr5-128	chr5	23518950	23519100	+	23.7	0	intron (NM_009274, intron 10 of 14)	84596	NM_026984	Kmt2e
	chr1-266	chr1	79406687	79406837	+	23.7	0	Intergenic	33328	NM_009129	Scg2
	chr8-243	chr8	94838300	94838450	+	23.7	0	promoter-TSS (NM_026452)	-35	NM_134141	Ciapin1
	chr1-274	chr1	36129371	36129521	+	23.7	0	Intergenic	14867	NR_105862	Mir6897
	chr14-73	chr14	55716976	55717126	+	23.7	0	intron (NM_019519, intron 15 of 15)	-3559	NM_001161715	Tgm1
	chr2-300	chr2	78004548	78004698	+	23.7	0	Intergenic	-46554	NR_108098	4930440I19Rik
	chr5-133	chr5	88652761	88652911	+	23.7	0	MTC|LTR|ERVL-MaLR	22744	NM_001098476	Grsf1
	chr6-215	chr6	67057193	67057343	+	23.7	0	L2c|LINE|L2	-19861	NM_007836	Gadd45a
	chr13-152	chr13	95794813	95794963	+	23.7	0	intron (NM_027711, intron 2 of 35)	97034	NM_027711	Iqgap2
	chr17-146	chr17	93260795	93260945	+	23.7	0	Intergenic	61702	NM_009625	Adcyap1
	chr15-155	chr15	44431167	44431317	+	23.7	0	L2a|LINE|L2	-2935	NM_026149	Nudcd1
	chr17-149	chr17	49672144	49672294	+	23.7	0	intron (NM_177052, intron 4 of 22)	57047	NM_177052	Kif6
	chr9-99	chr9	34953511	34953661	+	23.7	0	intron (NM_001190913, intron 4 of 13)	-163142	NR_029475	4930581F22Rik
	chr15-111	chr15	31207505	31207655	+	23.7	0	Intergenic	-16805	NM_146057	Dap
	chr1-227	chr1	33903744	33903894	+	23.7	0	intron (NM_177235, intron 1 of 6)	3802	NM_177235	Bend6
	chr1-218	chr1	118902288	118902438	+	23.7	0	intron (NM_001081125, intron 2 of 13)	-51857	NR_105764	Mir6346
	chr9-100	chr9	35326987	35327137	+	23.7	0	Intergenic	45957	NR_040715	4933422A05Rik
	chr2-352	chr2	34346884	34347034	+	23.3	0	intron (NM_016768, intron 2 of 8)	25086	NM_001290576	Pbx3
	chr6-256	chr6	108598784	108598934	+	23.3	0	intron (NR_104577, intron 3 of 6)	24308	NR_040757	0610040F04Rik
	chr5-158	chr5	144268024	144268174	+	23.3	0	intron (NM_025833, intron 12 of 13)	-8962	NR_040432	Gm15708
	chr13-161	chr13	12503476	12503626	+	23.3	0	intron (NM_133643, intron 3 of 5)	16899	NM_133643	Edaradd
	chr17-166	chr17	78325997	78326147	+	23.3	0	intron (NM_015800, intron 7 of 16)	92080	NM_001285949	Fez2
	chr5-159	chr5	146315570	146315720	+	23.3	0	Intergenic	-69361	NM_145155	Wasf3
	chr8-210	chr8	47763801	47763951	+	23.3	0	Intergenic	-49945	NM_172407	Cdkn2aip
	chr17-138	chr17	14372619	14372769	+	23.3	0	intron (NM_022315, intron 8 of 12)	26248	NR_027986	4930474M22Rik
	chr6-227	chr6	124319645	124319795	+	23.3	0	intron (NM_053094, intron 10 of 16)	15069	NM_053094	Cd163
	chr8-265	chr8	114374605	114374755	+	23.3	0	TTS (NM_173016)	-23202	NR_045831	4933408N05Rik
	chr1-276	chr1	82162920	82163070	+	23.3	0	Intergenic	31079	NR_105762	Mir6344
	chr19-105	chr19	38238190	38238340	+	23.3	0	Intergenic	-14133	NM_001081075	Fra10ac1
	chr2-321	chr2	174622949	174623099	+	23.3	0	Intergenic	-20510	NM_001099328	Zfp831
	chr1-250	chr1	20950465	20950615	+	23.3	0	MT2B1|LTR|ERVL	-1086	NM_027974	Efhc1
	chr1-231	chr1	97943687	97943837	+	23.3	0	intron (NM_013626, intron 4 of 25)	104031	NR_037993	B230216N24Rik
	chr9-110	chr9	88142668	88142818	+	23.3	0	L1MA7|LINE|L1	-184866	NM_011851	Nt5e
	chr2-395	chr2	104763273	104763423	+	23.3	0	intron (NM_001123327, intron 9 of 11)	-20547	NM_144804	Depdc7
	chr2-315	chr2	138370102	138370252	+	23.3	0	Intergenic	91684	NM_145534	Btbd3
	chr4-57	chr4	107602472	107602622	+	22.9	0	intron (NM_147221, intron 4 of 10)	81615	NM_019872	Dmrtb1
	chr19-91	chr19	52633721	52633871	+	22.9	0	Intergenic	-289385	NR_030678	AA387883
	chr14-85	chr14	25554875	25555025	+	22.9	0	MIRb|SINE|MIR	20511	NR_037236	Mir3075
	chr3-417	chr3	90504523	90504673	+	22.9	0	intron (NM_023215, intron 2 of 4)	4900	NM_001293776	Chtop
	chr12-74	chr12	66734657	66734807	+	22.9	0	intron (NM_001193266, intron 3 of 16)	-450331	NM_001162933	Rpl10l
	chr3-442	chr3	137313848	137313998	+	22.9	0	Intergenic	-27155	NM_001163522	Emcn
	chr15-128	chr15	6954442	6954592	+	22.9	0	Intergenic	-80204	NM_001310469	Osmr
	chr8-293	chr8	78420394	78420544	+	22.9	0	Intergenic	16183	NM_138944	Pou4f2
	chr11-120	chr11	44367807	44367957	+	22.9	0	Intergenic	-32181	NM_001303244	Il12b
	chr13-168	chr13	115045386	115045536	+	22.9	0	intron (NM_001033228, intron 2 of 28)	44697	NM_134058	Pelo
	chr9-113	chr9	20944843	20944993	+	22.9	0	intron (NM_001199432, intron 1 of 38)	7705	NM_001199433	Dnmt1
	chr17-168	chr17	88095576	88095726	+	22.9	0	ORR1F|LTR|ERVL-MaLR	-29861	NM_001190356	Gm4832
	chr5-137	chr5	53016820	53016970	+	22.9	0	Intergenic	-24603	NR_040413	5033403H07Rik
	chr17-176	chr17	75049412	75049562	+	22.6	0	intron (NM_019919, intron 2 of 33)	43958	NM_019919	Ltbp1
	chr16-190	chr16	65954661	65954811	+	22.6	0	Intergenic	139103	NM_028572	Vgll3
	chr17-153	chr17	93312321	93312471	+	22.6	0	Intergenic	113228	NM_009625	Adcyap1
	chr1-272	chr1	29271109	29271259	+	22.6	0	Intergenic	-150304	NR_105760	Mir6342
	chr16-191	chr16	76864523	76864673	+	22.6	0	RMER1B|Other|Other	146283	NR_040573	1700041M19Rik
	chr8-325	chr8	57919404	57919554	+	22.6	0	intron (NM_175032, intron 6 of 11)	-266424	NM_144731	Galnt7
	chr1-293	chr1	84381126	84381276	+	22.6	0	intron (NM_152915, intron 12 of 12)	-96556	NM_001003948	Pid1
	chr13-198	chr13	116907285	116907435	+	22.6	0	intron (NM_001081009, intron 10 of 26)	118156	NM_001081009	Parp8
	chr1-256	chr1	119853053	119853203	+	22.6	0	Intergenic	-16057	NM_019933	Ptpn4
	chr3-372	chr3	96263649	96263799	+	22.6	0	promoter-TSS (NM_033596)	-407	NM_033596	Hist2h4
	chr15-150	chr15	54252827	54252977	+	22.6	0	intron (NM_008764, intron 4 of 4)	25582	NM_008764	Tnfrsf11b
	chr2-360	chr2	142024805	142024955	+	22.6	0	intron (NM_001013802, intron 8 of 18)	876584	NM_001081133	Kif16b
	chr2-383	chr2	112727137	112727287	+	22.6	0	BGLII|LTR|ERVK	167530	NM_001165935	Aven
	chr11-128	chr11	22693477	22693627	+	22.6	0	Intergenic	166183	NM_016888	B3gnt2
	chr5-148	chr5	16869751	16869901	+	22.6	0	Intergenic	315925	NM_001289461	Hgf
	chr10-97	chr10	10115146	10115296	+	22.6	0	Intergenic	-214181	NM_001081344	Stxbp5
	chr1-281	chr1	129850137	129850287	+	22.6	0	intron (NM_172485, intron 12 of 27)	572831	NM_007827	Cd55b
	chr3-375	chr3	105117150	105117300	+	22.6	0	Intergenic	50381	NM_029228	4930564D02Rik
	chr6-244	chr6	4563621	4563771	+	22.6	0	Intergenic	-37370	NM_145398	Casd1
	chr14-102	chr14	114837989	114838139	+	22.6	0	intron (NR_045661, intron 1 of 5)	6099	NR_045661	4930524C18Rik
	chr9-138	chr9	15619132	15619282	+	22.2	0	promoter-TSS (NR_040746)	-650	NR_040746	4930540M03Rik
	chr1-310	chr1	138507214	138507364	+	22.2	0	intron (NM_021605, intron 7 of 9)	112468	NM_021605	Nek7
	chr11-149	chr11	6943814	6943964	+	22.2	0	Intergenic	-119600	NM_009622	Adcy1
	chr15-163	chr15	31279736	31279886	+	22.2	0	Intergenic	55426	NM_146057	Dap
	chr5-168	chr5	44722758	44722908	+	22.2	0	intron (NM_001347349, intron 1 of 7)	76913	NM_001347349	Ldb2
	chr1-308	chr1	127575364	127575514	+	22.2	0	intron (NM_028135, intron 2 of 7)	102582	NM_028135	Tmem163
	chr2-372	chr2	101592636	101592786	+	22.2	0	intron (NM_026592, intron 2 of 6)	-32037	NM_009020	Rag2
	chr3-428	chr3	55495982	55496132	+	22.2	0	intron (NM_019978, intron 11 of 16)	34299	NM_001195540	Dclk1
	chr7-84	chr7	107595026	107595176	+	22.2	0	promoter-TSS (NM_008905)	50	NM_008905	Ppfibp2
	chr3-429	chr3	60575295	60575445	+	22.2	0	intron (NM_001310514, intron 2 of 8)	74191	NM_001253708	Mbnl1
	chr10-98	chr10	45560925	45561075	+	22.2	0	Intergenic	-16829	NM_172473	Hace1
	chr6-248	chr6	53564646	53564796	+	22.2	0	intron (NM_001327821, intron 5 of 10)	-8653	NM_172728	Creb5
	chr2-382	chr2	109996547	109996697	+	22.2	0	exon (NM_172671, exon 5 of 18)	-21195	NM_026613	Ccdc34
	chr12-81	chr12	98406186	98406336	+	22.2	0	Intergenic	-117583	NR_136759	Gm40893
	chr1-306	chr1	126512278	126512428	+	22.2	0	intron (NM_001081756, intron 3 of 16)	-19426	NM_172484	Nckap5
	chr2-373	chr2	117087500	117087650	+	22.2	0	Intergenic	-33496	NM_001277256	Spred1
	chr8-298	chr8	128491211	128491361	+	22.2	0	intron (NM_008737, intron 12 of 16)	132045	NR_035436	Mir1903
	chr10-120	chr10	14234331	14234481	+	22.2	0	Intergenic	268027	NM_010437	Hivep2
	chr13-171	chr13	16332919	16333069	+	22.2	0	Intergenic	321143	NM_008380	Inhba
	chr1-332	chr1	52470323	52470473	+	22.2	0	intron (NM_008667, intron 4 of 7)	30050	NM_008667	Nab1
	chr3-443	chr3	35405162	35405312	+	21.8	0	Intergenic	260926	NR_040748	Gm6639
	chr1-404	chr1	153180816	153180966	+	21.8	0	intron (NM_008485, intron 2 of 23)	5556	NM_008485	Lamc2
	chr13-205	chr13	81020047	81020197	+	21.8	0	intron (NR_015587, intron 1 of 1)	56048	NR_015587	9330111N05Rik
	chr8-304	chr8	72723161	72723311	+	21.8	0	promoter-TSS (NM_009188)	-34	NM_001113248	Sin3b
	chr12-97	chr12	110798324	110798474	+	21.8	0	intron (NM_001347428, intron 2 of 2)	42540	NM_011973	Mok
	chr5-186	chr5	20831597	20831747	+	21.8	0	MIR|SINE|MIR	50452	NM_172992	Phtf2
	chr12-88	chr12	36510090	36510240	+	21.8	0	intron (NM_178629, intron 6 of 9)	94549	NR_037309	Mir3472
	chr1-317	chr1	28054120	28054270	+	21.8	0	Intergenic	726057	NM_001013750	Gm597
	chr11-169	chr11	113214893	113215043	+	21.8	0	Intergenic	-5299	NR_040276	4732490B19Rik
	chr9-136	chr9	92292271	92292421	+	21.8	0	MER44D|DNA|TcMar-Tigger	16744	NM_001195084	Plscr2
	chr2-404	chr2	145756516	145756666	+	21.8	0	Intergenic	-29525	NM_028724	Rin2
	chr13-203	chr13	63512507	63512657	+	21.8	0	intron (NM_001328514, intron 22 of 23)	53153	NM_008957	Ptch1
	chr19-124	chr19	55139437	55139587	+	21.8	0	Intergenic	-40065	NM_008149	Gpam
	chr8-327	chr8	78752347	78752497	+	21.8	0	MLT1H|LTR|ERVL-MaLR	68730	NM_001191004	Lsm6
	chr2-458	chr2	11441972	11442122	+	21.4	0	Intergenic	-43547	NR_040615	8030442B05Rik
	chr17-195	chr17	58924016	58924166	+	21.4	0	intron (NM_027001, intron 7 of 12)	67284	NM_027001	Pdzph1
	chr17-196	chr17	67118811	67118961	+	21.4	0	intron (NM_008984, intron 2 of 30)	-92651	NR_049205	Mir5709
	chr8-310	chr8	13642830	13642980	+	21.4	0	intron (NM_009025, intron 1 of 23)	34682	NM_009025	Rasa3
	chr1-402	chr1	127382472	127382622	+	21.4	0	intron (NM_145128, intron 6 of 17)	177561	NM_145128	Mgat5
	chr19-135	chr19	32324577	32324727	+	21.4	0	intron (NM_144792, intron 2 of 9)	24664	NM_001168525	Sgms1
	chr3-460	chr3	29823131	29823281	+	21.4	0	Intergenic	-67811	NR_110437	Mannr
	chr1-323	chr1	136512385	136512535	+	21.4	0	MER131|SINE?|SINE?	44612	NM_001287179	Kif14
	chr2-381	chr2	49957655	49957805	+	21.4	0	Intergenic	-108699	NR_033304	Lypd6
	chr16-202	chr16	24495569	24495719	+	21.4	0	intron (NM_001145952, intron 2 of 11)	-33670	NR_038091	Morf4l1-ps1
	chr3-432	chr3	68385699	68385849	+	21.4	0	intron (NM_001113420, intron 1 of 6)	-82409	NM_001282045	Schip1
	chr14-124	chr14	53504691	53504841	+	21.4	0	Lx8|LINE|L1	749163	NM_001113358	Dad1
	chr1-358	chr1	153092673	153092823	+	21.4	0	MER20|DNA|hAT-Charlie	93699	NM_008485	Lamc2
	chr6-236	chr6	38551337	38551487	+	21.4	0	promoter-TSS (NM_001170849)	78	NM_001170848	Luc7l2
	chr16-215	chr16	23792983	23793133	+	21.4	0	Intergenic	97786	NM_009215	Sst
	chr8-318	chr8	8562400	8562550	+	21.4	0	Intergenic	98298	NM_010111	Efnb2
	chr5-204	chr5	72816553	72816703	+	21.4	0	intron (NM_001113461, intron 3 of 17)	51820	NM_001113461	Tec
	chr12-102	chr12	3917770	3917920	+	21.4	0	Intergenic	26101	NM_153743	Dnmt3a
	chr8-311	chr8	26622500	26622650	+	21.4	0	C-rich|Low_complexity|Low_complexity	201848	NR_045904	2310008N11Rik
	chr1-408	chr1	189143121	189143271	+	21.4	0	Intergenic	-135356	NM_172650	Kctd3
	chr14-116	chr14	40938693	40938843	+	21.4	0	intron (NM_145928, intron 1 of 8)	9441	NM_001316748	Tspan14
	chr15-165	chr15	38728206	38728356	+	21	0	non-coding (NR_131206, exon 1 of 3)	235	NR_131206	Borg
	chr2-485	chr2	106756738	106756888	+	21	0	intron (NM_029837, intron 3 of 6)	61212	NM_029837	Mpped2
	chr1-348	chr1	20471301	20471451	+	21	0	intron (NM_153179, intron 35 of 66)	114922	NR_045734	4930486I03Rik
	chr1-349	chr1	29442683	29442833	+	21	0	RLTR13B4|LTR|ERVK	21270	NR_105760	Mir6342
	chr3-398	chr3	58729573	58729723	+	21	0	intron (NR_045167, intron 2 of 7)	37059	NR_045167	4930593A02Rik
	chr2-403	chr2	145613812	145613962	+	21	0	intron (NM_053195, intron 13 of 16)	-58905	NM_001037929	Gm14092
	chr7-160	chr7	107694714	107694864	+	21	0	intron (NM_001163557, intron 5 of 25)	63243	NM_001205227	Cyb5r2
	chr8-356	chr8	48205054	48205204	+	21	0	Intergenic	95116	NM_001161515	Dctd
	chr11-148	chr11	119150576	119150726	+	21	0	intron (NM_001347625, intron 10 of 11)	3486	NR_105899	Mir6934
	chr6-271	chr6	124256150	124256300	+	21	0	Intergenic	-24441	NM_001104642	Vmn2r27
	chr3-502	chr3	37354880	37355030	+	21	0	intron (NM_008006, intron 1 of 2)	6302	NM_008006	Fgf2
	chr1-345	chr1	12777453	12777603	+	21	0	intron (NM_172294, intron 2 of 21)	58983	NM_172294	Sulf1
	chr8-314	chr8	78798088	78798238	+	21	0	Intergenic	22989	NM_001191004	Lsm6
	chr8-350	chr8	15871648	15871798	+	21	0	Intergenic	297115	NR_037214	Mir3106
	chr19-144	chr19	9896452	9896602	+	21	0	RMER15|LTR|ERVL	3006	NM_016692	Incenp
	chr16-227	chr16	49358452	49358602	+	21	0	L2c|LINE|L2	301041	NM_001166210	Myh15
	chr2-400	chr2	122011602	122011752	+	21	0	3' UTR (NM_001290992, exon 13 of 13)	-16903	NM_144545	Eif3j1
	chr2-419	chr2	125102564	125102714	+	21	0	intron (NM_010852, intron 9 of 15)	21021	NM_001162417	Myef2
	chr5-194	chr5	124168853	124169003	+	21	0	intron (NM_011256, intron 2 of 24)	18254	NM_001289472	Pitpnm2
	chr17-223	chr17	51547180	51547330	+	21	0	intron (NR_037250, intron 3 of 4)	-98986	NR_046166	C330011F03Rik
	chr6-317	chr6	47559396	47559546	+	21	0	intron (NM_001146689, intron 3 of 19)	35559	NM_007971	Ezh2
	chr12-72	chr12	5108688	5108838	+	21	0	intron (NM_001164493, intron 5 of 13)	191410	NM_001099628	Atad2b
	chr15-206	chr15	59836480	59836630	+	21	0	MIRc|SINE|MIR	-41596	NR_045076	Gm19510
	chr1-347	chr1	19732959	19733109	+	21	0	Intergenic	520980	NM_001025305	Tfap2b
	chr19-140	chr19	27429838	27429988	+	21	0	promoter-TSS (NR_027987)	-5	NR_131940	Pum3
	chr8-357	chr8	66838251	66838401	+	20.7	0	Intergenic	-21891	NM_001163564	Naf1
	chr16-271	chr16	7647711	7647861	+	20.7	0	Intergenic	577951	NM_183188	Rbfox1
	chr13-228	chr13	35755761	35755911	+	20.7	0	intron (NM_001123386, intron 1 of 6)	14434	NM_001123386	Cdyl
	chr11-174	chr11	55406072	55406222	+	20.7	0	intron (NM_001290817, intron 4 of 9)	13933	NM_009242	Sparc
	chr3-462	chr3	79742641	79742791	+	20.7	0	ORR1E-int|LTR|ERVL-MaLR	-4922	NM_212452	Rxfp1
	chr11-221	chr11	30198188	30198338	+	20.7	0	promoter-TSS (NM_009260)	-6	NM_009260	Sptbn1
	chr15-201	chr15	25444210	25444360	+	20.7	0	intron (NR_027376, intron 1 of 1)	30093	NR_027376	Gm5468
	chr10-131	chr10	111024774	111024924	+	20.7	0	Intergenic	-14783	NM_172554	Zdhhc17
	chr3-474	chr3	41607119	41607269	+	20.7	0	intron (NM_001130184, intron 9 of 10)	42314	NM_001130186	Jade1
	chr16-194	chr16	30661718	30661868	+	20.7	0	Intergenic	62070	NM_177632	Fam43a
	chr6-298	chr6	142190662	142190812	+	20.7	0	MMVL30-int|LTR|ERV1	-4588	NM_023718	Slco1a6
	chr9-159	chr9	14521764	14521914	+	20.7	0	Intergenic	21220	NM_023153	Cwc15
	chr3-485	chr3	20101123	20101273	+	20.7	0	MTEa-int|LTR|ERVL-MaLR	42907	NR_105047	Hltf
	chr14-107	chr14	67917499	67917649	+	20.7	0	intron (NM_177780, intron 1 of 51)	15998	NM_177780	Dock5
	chr10-103	chr10	3630929	3631079	+	20.7	0	Intergenic	90725	NM_027391	Iyd
	chr2-422	chr2	14131030	14131180	+	20.7	0	exon (NM_011484, exon 8 of 14)	-43419	NM_001081310	Tmem236
	chr9-131	chr9	34970032	34970182	+	20.7	0	intron (NM_001190913, intron 4 of 13)	-146621	NR_029475	4930581F22Rik
	chr8-335	chr8	35948877	35949027	+	20.7	0	Intergenic	-65995	NR_046181	5430403N17Rik
	chr1-377	chr1	36939870	36940020	+	20.7	0	promoter-TSS (NM_018872)	-418	NM_018872	Tmem131
	chr3-506	chr3	84974932	84975082	+	20.7	0	intron (NM_001177773, intron 12 of 13)	22796	NM_080428	Fbxw7
	chr8-341	chr8	86350270	86350420	+	20.7	0	Intergenic	216245	NM_172912	Abcc12
	chr19-146	chr19	17263774	17263924	+	20.7	0	Intergenic	75656	NM_001136484	Gcnt1
	chr3-505	chr3	63433880	63434030	+	20.7	0	Intergenic	137860	NM_001289463	Mme
	chr8-361	chr8	83799338	83799488	+	20.7	0	MER63A|DNA|hAT-Blackjack	-58102	NM_001163031	Adgre5
	chr6-316	chr6	47554550	47554700	+	20.7	0	intron (NM_007971, intron 5 of 19)	40405	NM_007971	Ezh2
	chr3-496	chr3	152113573	152113723	+	20.7	0	intron (NM_016867, intron 3 of 5)	52252	NM_016867	Gipc2
	chr13-229	chr13	52188621	52188771	+	20.3	0	MLT1A1|LTR|ERVL-MaLR	91955	NR_045061	4921525O09Rik
	chr3-490	chr3	117615001	117615151	+	20.3	0	L2b|LINE|L2	39849	NM_001305451	Plppr5
	chr3-450	chr3	84666290	84666440	+	20.3	0	exon (NM_177260, exon 1 of 7)	173	NM_177260	Tmem154
	chr16-233	chr16	4367666	4367816	+	20.3	0	RLTR14-int|LTR|ERV1	52757	NM_001291910	Adcy9
	chr2-463	chr2	49825843	49825993	+	20.3	0	intron (NM_027990, intron 1 of 9)	38232	NM_027990	Lypd6b
	chr2-446	chr2	29124943	29125093	+	20.3	0	promoter-TSS (NM_198033)	26	NM_198033	Setx
	chr2-450	chr2	131678675	131678825	+	20.3	0	Intergenic	-73926	NR_037281	Mir3098
	chr12-122	chr12	99347703	99347853	+	20.3	0	MIRc|SINE|MIR	102296	NM_183186	Foxn3
	chr7-190	chr7	117564164	117564314	+	20.3	0	intron (NM_175645, intron 3 of 11)	183260	NM_175645	Xylt1
	chr9-158	chr9	5308673	5308823	+	20.3	0	promoter-TSS (NM_007609)	-101	NM_007609	Casp4
	chr8-333	chr8	26808530	26808680	+	20.3	0	Intergenic	15818	NR_045904	2310008N11Rik
	chr2-460	chr2	27809942	27810092	+	20.3	0	Intergenic	-76408	NM_015734	Col5a1
	chr11-205	chr11	63021391	63021541	+	20.3	0	intron (NR_105772, intron 5 of 6)	-17332	NR_126547	Cdrt4os1
	chr4-81	chr4	145066993	145067143	+	20.3	0	intron (NM_001276502, intron 56 of 68)	123598	NM_001276502	Vps13d
	chr3-562	chr3	138225286	138225436	+	20.3	0	intron (NM_009626, intron 5 of 8)	7588	NM_009626	Adh7
	chr1-385	chr1	105223339	105223489	+	20.3	0	Intergenic	133296	NM_178779	Rnf152
	chr6-325	chr6	125701381	125701531	+	20.3	0	intron (NM_153589, intron 1 of 25)	11037	NM_153589	Ano2
	chr11-186	chr11	92551530	92551680	+	20.3	0	MTE-int|LTR|ERVL-MaLR	-547685	NM_028296	Car10
	chr6-318	chr6	54332318	54332468	+	20.3	0	intron (NR_033635, intron 3 of 13)	5381	NM_030024	Prr15
	chr5-227	chr5	98290776	98290926	+	20.3	0	Intergenic	36667	NM_001277268	Fgf5
	chr4-78	chr4	48289315	48289465	+	20.3	0	intron (NM_010569, intron 2 of 16)	9630	NM_001281977	Invs
	chr1-382	chr1	87271111	87271261	+	20.3	0	intron (NM_028889, intron 1 of 3)	6822	NM_028889	Efhd1
	chr2-486	chr2	109823516	109823666	+	20.3	0	Intergenic	-67287	NM_011699	Lin7c
	chr5-211	chr5	146298961	146299111	+	20.3	0	intron (NM_153599, intron 10 of 12)	67361	NM_153599	Cdk8
	chr19-175	chr19	32326547	32326697	+	20.3	0	intron (NM_144792, intron 2 of 9)	22694	NM_001168525	Sgms1
	chr1-363	chr1	42873342	42873492	+	20.3	0	intron (NM_023514, intron 2 of 10)	22184	NM_023514	Mrps9
	chr2-478	chr2	12259375	12259525	+	19.9	0	intron (NR_138462, intron 4 of 30)	-41796	NR_040353	E030013I19Rik
	chr13-255	chr13	72198871	72199021	+	19.9	0	Intergenic	-235223	NM_010573	Irx1
	chr1-394	chr1	28379470	28379620	+	19.9	0	Intergenic	400707	NM_001013750	Gm597
	chr2-515	chr2	144101713	144101863	+	19.9	0	Intergenic	68686	NM_207275	Banf2
	chr6-336	chr6	8319755	8319905	+	19.9	0	Lx9|LINE|L1	60542	NM_001302353	Umad1
	chr6-306	chr6	94815053	94815203	+	19.9	0	Intergenic	32272	NR_035483	Mir1957a
	chr3-536	chr3	61416113	61416263	+	19.9	0	Intergenic	51681	NM_028712	Rap2b
	chr3-528	chr3	130814245	130814395	+	19.9	0	Intergenic	-83922	NM_001005859	Rpl34
	chr1-479	chr1	97944607	97944757	+	19.9	0	intron (NM_013626, intron 3 of 25)	103111	NR_037993	B230216N24Rik
	chr7-218	chr7	16399789	16399939	+	19.9	0	CpG	-1332	NM_198631	Zc3h4
	chr1-457	chr1	82156125	82156275	+	19.9	0	Charlie13a|DNA|hAT-Charlie	24284	NR_105762	Mir6344
	chr5-206	chr5	74697701	74697851	+	19.9	0	intron (NM_001159577, intron 1 of 10)	5127	NM_001159577	Lnx1
	chr12-123	chr12	103157629	103157779	+	19.9	0	intron (NM_001081017, intron 41 of 48)	84442	NM_133364	Prima1
	chr15-183	chr15	36870886	36871036	+	19.9	0	L2b|LINE|L2	-74032	NM_001253806	Ywhaz
	chr14-146	chr14	77678052	77678202	+	19.9	0	intron (NM_001253759, intron 17 of 19)	120841	NM_001033440	Gm1587
	chr2-430	chr2	84048874	84049024	+	19.9	0	L1MD3|LINE|L1	-107723	NM_027964	Zswim2
	chr11-189	chr11	109546773	109546923	+	19.9	0	intron (NM_001166177, intron 1 of 4)	3137	NM_001166177	Arsg
	chr6-351	chr6	6291904	6292054	+	19.9	0	intron (NR_136905, intron 1 of 3)	43320	NR_136905	Gm20619
	chr8-385	chr8	73007417	73007567	+	19.9	0	intron (NM_001317391, intron 7 of 15)	-9020	NR_039551	Mir28b
	chr12-134	chr12	117872405	117872555	+	19.9	0	intron (NM_146040, intron 4 of 9)	28619	NM_146040	Cdca7l
	chr1-444	chr1	139422113	139422263	+	19.9	0	promoter-TSS (NM_172643)	-195	NM_172643	Zbtb41
	chr19-174	chr19	16326031	16326181	+	19.9	0	intron (NM_008139, intron 3 of 6)	-11102	NR_105832	Mir496b
	chr9-185	chr9	65201731	65201881	+	19.9	0	U5|snRNA|snRNA	-12884	NM_177460	Parp16
	chr2-433	chr2	105977709	105977859	+	19.9	0	intron (NR_033993, intron 2 of 3)	25765	NM_026992	Dnajc24
	chr18-75	chr18	32054815	32054965	+	19.9	0	Intergenic	-12844	NM_173441	Iws1
	chr16-249	chr16	38370799	38370949	+	19.9	0	intron (NM_001081984, intron 2 of 3)	8684	NM_022318	Popdc2
	chr15-199	chr15	7152295	7152445	+	19.9	0	MIRb|SINE|MIR	11828	NM_013584	Lifr
	chr18-85	chr18	73708395	73708545	+	19.5	0	Intergenic	-4729	NM_008540	Smad4
	chr19-182	chr19	30090324	30090474	+	19.5	0	B2_Mm1a|SINE|B2	59886	NM_144873	Uhrf2
	chr8-358	chr8	68276065	68276215	+	19.5	0	promoter-TSS (NM_028182)	-388	NM_028182	Sh2d4a
	chr19-180	chr19	7054883	7055033	+	19.5	0	Intergenic	-1810	NM_134147	Macrod1
	chr12-145	chr12	90946316	90946466	+	19.5	0	Intergenic	-99457	NR_045858	5430427M07Rik
	chr8-405	chr8	60764089	60764239	+	19.5	0	Intergenic	108607	NM_001177882	Mfap3l
	chr7-178	chr7	43546155	43546305	+	19.5	0	Intergenic	-13059	NM_021293	Cd33
	chr2-483	chr2	84163440	84163590	+	19.5	0	Intergenic	-222289	NM_027964	Zswim2
	chr3-529	chr3	133563648	133563798	+	19.5	0	Intergenic	-19333	NM_001040400	Tet2
	chr12-129	chr12	57776745	57776895	+	19.5	0	Intergenic	-113909	NR_131112	BC042761
	chr1-397	chr1	75124893	75125043	+	19.5	0	TTS (NM_194333)	8922	NM_194333	Slc23a3
	chr8-353	chr8	27008672	27008822	+	19.5	0	Intergenic	-15052	NM_153592	Erlin2
	chr1-463	chr1	152258363	152258513	+	19.5	0	Intergenic	128244	NM_025677	Tsen15
	chr3-509	chr3	100394918	100395068	+	19.5	0	Intergenic	-31412	NR_040543	4930406D18Rik
	chr3-590	chr3	104670822	104670972	+	19.5	0	Intergenic	32233	NM_009196	Slc16a1
	chr9-167	chr9	31117565	31117715	+	19.5	0	intron (NM_011176, intron 1 of 18)	14159	NM_011176	St14
	chr4-99	chr4	122838180	122838330	+	19.5	0	intron (NM_008917, intron 1 of 8)	2028	NM_008917	Ppt1
	chr16-255	chr16	76388991	76389141	+	19.5	0	Intergenic	-16017	NM_173440	Nrip1
	chr16-212	chr16	11330551	11330701	+	19.5	0	intron (NM_028964, intron 1 of 20)	7722	NM_028964	Snx29
	chr8-408	chr8	104375075	104375225	+	19.5	0	intron (NM_153582, intron 1 of 3)	20657	NM_153582	Cmtm4
	chr5-210	chr5	139930160	139930310	+	19.5	0	intron (NM_175522, intron 1 of 1)	22292	NM_175522	Elfn1
	chr14-131	chr14	72983522	72983672	+	19.5	0	Intergenic	-42006	NR_027860	Gm9199
	chr11-269	chr11	89060572	89060722	+	19.5	0	promoter-TSS (NR_110336)	101	NM_019505	Dgke
	chr11-222	chr11	33882829	33882979	+	19.5	0	intron (NM_001190886, intron 1 of 7)	-39319	NM_001290690	Kcnip1
	chr12-133	chr12	104814583	104814733	+	19.5	0	intron (NM_001040682, intron 1 of 12)	50418	NR_104436	Clmn
	chr11-230	chr11	43608407	43608557	+	19.5	0	Intergenic	-6920	NM_008375	Fabp6
	chr18-90	chr18	46958751	46958901	+	19.5	0	promoter-TSS (NM_178377)	-50	NM_178377	Commd10
	chr19-168	chr19	17372796	17372946	+	19.5	0	promoter-TSS (NM_010265)	-27	NM_010265	Gcnt1
	chr13-235	chr13	101676867	101677017	+	19.5	0	Intergenic	15688	NM_001024955	Pik3r1
	chr12-136	chr12	8865118	8865268	+	19.5	0	Intergenic	-56114	NM_008640	Laptm4a
	chr7-184	chr7	139810239	139810389	+	19.5	0	Intergenic	-23860	NM_177469	Adgra1
	chr7-235	chr7	38112117	38112267	+	19.1	0	MLT1K|LTR|ERVL-MaLR	-4702	NM_007633	Ccne1
	chr2-536	chr2	125162130	125162280	+	19.1	0	intron (NM_001079690, intron 5 of 27)	9605	NM_001079690	Slc12a1
	chr1-506	chr1	39144575	39144725	+	19.1	0	Tigger7|DNA|TcMar-Tigger	42342	NR_105767	Mir6349
	chr18-92	chr18	81831364	81831514	+	19.1	0	Intergenic	160641	NR_039589	Mir5127
	chr7-240	chr7	83815298	83815448	+	19.1	0	Intergenic	-20534	NM_029335	Cfap161
	chr2-452	chr2	143501817	143501967	+	19.1	0	Intergenic	-44241	NM_008792	Pcsk2
	chr10-158	chr10	107905752	107905902	+	19.1	0	intron (NM_001177567, intron 3 of 57)	6307	NM_001177567	Otogl
	chr6-369	chr6	125319077	125319227	+	19.1	0	Intergenic	-2188	NM_011324	Scnn1a
	chr8-410	chr8	110802967	110803117	+	19.1	0	intron (NM_029646, intron 1 of 7)	2882	NM_029646	Il34
	chr7-179	chr7	66724501	66724651	+	19.1	0	Intergenic	-18928	NM_001164201	Cers3
	chr3-558	chr3	90656072	90656222	+	19.1	0	intron (NM_199422, intron 2 of 2)	1845	NM_199422	S100a7a
	chr11-215	chr11	5271648	5271798	+	19.1	0	Intergenic	-10113	NM_032396	Kremen1
	chr9-204	chr9	38718928	38719078	+	19.1	0	intron (NM_001145957, intron 1 of 18)	735	NM_172767	Vwa5a
	chr2-541	chr2	137646074	137646224	+	19.1	0	Intergenic	-529629	NM_013822	Jag1
	chr4-114	chr4	34551578	34551728	+	19.1	0	intron (NM_001007589, intron 1 of 4)	1038	NM_001007589	Akirin2
	chr15-246	chr15	34606189	34606339	+	19.1	0	intron (NM_145469, intron 5 of 10)	-68809	NR_045883	4930413F20Rik
	chr3-484	chr3	144585463	144585613	+	19.1	0	intron (NM_053102, intron 2 of 4)	15111	NM_053102	Selenof
	chr10-164	chr10	80329866	80330016	+	19.1	0	promoter-TSS (NM_139292)	-204	NM_001204931	Reep6
	chr3-508	chr3	97188977	97189127	+	19.1	0	Intergenic	30275	NM_019800	Acp6
	chr3-493	chr3	129725760	129725910	+	19.1	0	promoter-TSS (NM_001310737)	-749	NM_001329594	Egf
	chr3-546	chr3	126723278	126723428	+	19.1	0	intron (NM_001346636, intron 3 of 20)	126402	NM_023813	Camk2d
	chr3-532	chr3	158577985	158578135	+	19.1	0	ORR1C2|LTR|ERVL-MaLR	-15839	NM_001081358	Lrrc7
	chr9-200	chr9	20607303	20607453	+	19.1	0	promoter-TSS (NR_033729)	-97	NR_033729	Fbxl12os
	chr12-115	chr12	91668705	91668855	+	19.1	0	intron (NM_175367, intron 4 of 6)	-78293	NM_175335	Gtf2a1
	chr6-371	chr6	135814010	135814160	+	19.1	0	intron (NM_008171, intron 6 of 14)	155172	NR_126088	4930425L21Rik
	chr13-265	chr13	52910065	52910215	+	19.1	0	intron (NM_016709, intron 3 of 9)	19537	NM_016709	Auh
	chr1-456	chr1	61658496	61658646	+	19.1	0	intron (NM_001081050, intron 1 of 22)	19747	NM_001081050	Pard3b
	chr15-213	chr15	7841821	7841971	+	19.1	0	Intergenic	26346	NM_001301357	Gdnf
	chr13-245	chr13	72343573	72343723	+	19.1	0	MTD|LTR|ERVL-MaLR	284916	NR_030701	Gm20554
	chr3-555	chr3	22075033	22075183	+	19.1	0	Intergenic	-1544	NM_030732	Tbl1xr1
	chr15-253	chr15	66818804	66818954	+	19.1	0	intron (NM_009192, intron 1 of 8)	12950	NM_001029841	Sla
	chr17-276	chr17	70987391	70987541	+	19.1	0	intron (NM_023402, intron 1 of 3)	3050	NM_023402	Myl12b
	chr13-243	chr13	60147306	60147456	+	18.7	0	Intergenic	30154	NM_008086	Gas1
	chr3-599	chr3	27604371	27604521	+	18.7	0	intron (NM_173182, intron 3 of 25)	-19451	NR_037275	Mir3092
	chr6-391	chr6	7984964	7985114	+	18.7	0	Intergenic	139815	NM_052993	C1galt1
	chr16-272	chr16	10465319	10465469	+	18.7	0	Intergenic	-14678	NM_001302619	Ciita
	chr3-503	chr3	53347806	53347956	+	18.7	0	Intergenic	115377	NM_172501	Nhlrc3
	chr3-563	chr3	141996500	141996650	+	18.7	0	MLT1G|LTR|ERVL-MaLR	-14311	NM_007560	Bmpr1b
	chr8-417	chr8	68364882	68365032	+	18.7	0	intron (NM_172753, intron 8 of 9)	-3502	NR_038189	1700125H03Rik
	chr1-540	chr1	106144558	106144708	+	18.7	0	MTE2b|LTR|ERVL-MaLR	26891	NR_040630	Gm20753
	chr4-96	chr4	62661455	62661605	+	18.7	0	L2c|LINE|L2	-12444	NM_001310706	Rgs3
	chr11-247	chr11	50705503	50705653	+	18.7	0	L1MA4|LINE|L1	103493	NM_175643	Adamts2
	chr9-189	chr9	79952014	79952164	+	18.7	0	ORR1E|LTR|ERVL-MaLR	25793	NM_001081243	Filip1
	chr1-447	chr1	168226311	168226461	+	18.7	0	intron (NM_008783, intron 2 of 7)	205783	NM_001291508	Pbx1
	chr17-292	chr17	74501084	74501234	+	18.7	0	TTS (NM_026417)	11666	NM_026417	Yipf4
	chr6-368	chr6	124426656	124426806	+	18.7	0	Intergenic	-11664	NM_001277805	Pex5
	chr17-275	chr17	66350991	66351141	+	18.7	0	intron (NM_001114098, intron 10 of 14)	98684	NM_172963	Mtcl1
	chr10-172	chr10	66987631	66987781	+	18.7	0	Intergenic	-17369	NR_110511	Gm31763
	chr3-557	chr3	67459909	67460059	+	18.7	0	intron (NM_016753, intron 4 of 5)	3923	NM_016753	Lxn
	chr6-394	chr6	54565119	54565269	+	18.7	0	intron (NM_027268, intron 1 of 7)	1188	NM_027268	Scrn1
	chr10-144	chr10	96001029	96001179	+	18.7	0	intron (NM_001001932, intron 9 of 28)	60441	NM_001001932	Eea1
	chr5-281	chr5	112972994	112973144	+	18.7	0	URR1A|DNA|hAT-Charlie	42469	NM_001285806	Grk3
	chr19-184	chr19	38224043	38224193	+	18.7	0	promoter-TSS (NM_001081075)	14	NM_001081075	Fra10ac1
	chr14-150	chr14	15075879	15076029	+	18.7	0	Intergenic	255139	NM_001195229	Nek10
	chr17-229	chr17	27767523	27767673	+	18.7	0	intron (NM_001271511, intron 3 of 3)	-38647	NM_013891	Spdef
	chr2-539	chr2	132432612	132432762	+	18.7	0	intron (NR_045802, intron 1 of 3)	7946	NR_045802	4921508D12Rik
	chr2-553	chr2	51989762	51989912	+	18.7	0	Intergenic	-16629	NM_001141948	Nmi
	chr11-260	chr11	46291101	46291251	+	18.7	0	intron (NM_133769, intron 2 of 30)	21182	NM_001252460	Cyfip2
	chr14-154	chr14	41253665	41253815	+	18.7	0	Intergenic	-68542	NM_009160	Sftpd
	chr8-375	chr8	66275355	66275505	+	18.7	0	intron (NM_001166372, intron 3 of 7)	-110871	NM_001166375	2020-03-01
	chr6-376	chr6	3741350	3741500	+	18.7	0	intron (NM_007588, intron 3 of 15)	-19422	NR_030250	Mir489
	chr12-152	chr12	90165700	90165850	+	18.7	0	intron (NM_001252074, intron 2 of 6)	353292	NM_001252074	Nrxn3
	chr5-302	chr5	132075280	132075430	+	18.7	0	intron (NM_177047, intron 2 of 18)	195086	NR_040704	4930563F08Rik
	chr7-239	chr7	64856749	64856899	+	18.7	0	intron (NM_183087, intron 2 of 9)	16216	NM_023239	Ndnl2
	chr9-186	chr9	75780751	75780901	+	18.7	0	intron (NM_007555, intron 1 of 6)	5461	NM_007555	Bmp5
	chr7-217	chr7	139769315	139769465	+	18.7	0	RLTR30D2_MM|LTR|ERV1	-9628	NR_105827	Mir6401
	chr18-76	chr18	39378422	39378572	+	18.4	0	Intergenic	108748	NM_008173	Nr3c1
	chr9-213	chr9	15138657	15138807	+	18.4	0	Intergenic	-26624	NM_001164797	Hephl1
	chr16-306	chr16	35760413	35760563	+	18.4	0	L2a|LINE|L2	8868	NM_153550	Dirc2
	chr13-289	chr13	21419218	21419368	+	18.4	0	Intergenic	-16538	NM_023685	Zkscan3
	chr8-457	chr8	91331668	91331818	+	18.4	0	intron (NM_011936, intron 1 of 8)	18218	NM_011936	Fto
	chr12-144	chr12	89592544	89592694	+	18.4	0	intron (NM_172544, intron 14 of 19)	-219864	NM_001252074	Nrxn3
	chr17-246	chr17	75081615	75081765	+	18.4	0	intron (NM_019919, intron 3 of 33)	76161	NM_019919	Ltbp1
	chr3-581	chr3	9156695	9156845	+	18.4	0	Intergenic	-93797	NM_177660	Zbtb10
	chr3-614	chr3	115664770	115664920	+	18.4	0	Intergenic	50210	NM_007901	S1pr1
	chr2-574	chr2	58830138	58830288	+	18.4	0	intron (NM_001001178, intron 11 of 13)	75029	NM_029692	Upp2
	chr10-189	chr10	82863273	82863423	+	18.4	0	intron (NM_001042513, intron 2 of 14)	3007	NM_001042514	Txnrd1
	chr6-402	chr6	5005542	5005692	+	18.4	0	intron (NM_181595, intron 2 of 15)	102297	NM_181595	Ppp1r9a
	chr8-430	chr8	57962509	57962659	+	18.4	0	intron (NM_175032, intron 4 of 11)	-309529	NM_144731	Galnt7
	chr1-439	chr1	106168076	106168226	+	18.4	0	MER135|DNA|DNA	3373	NR_040630	Gm20753
	chr18-93	chr18	32445173	32445323	+	18.4	0	Intergenic	-66964	NR_045403	A830052D11Rik
	chr14-180	chr14	121172636	121172786	+	18.4	0	intron (NM_134082, intron 2 of 26)	137137	NM_134082	Farp1
	chr5-262	chr5	112997574	112997724	+	18.4	0	intron (NM_177078, intron 1 of 20)	17889	NM_001285806	Grk3
	chr5-291	chr5	64012882	64013032	+	18.4	0	Intergenic	-32016	NR_045384	5830416I19Rik
	chr12-172	chr12	118811693	118811843	+	18.4	0	Intergenic	-34561	NM_177082	Sp8
	chr2-543	chr2	148507373	148507523	+	18.4	0	Lx8|LINE|L1	-63913	NM_010740	Cd93
	chr11-270	chr11	94189633	94189783	+	18.4	0	Intergenic	-21746	NM_009427	Tob1
	chr2-598	chr2	58449253	58449403	+	18.4	0	intron (NM_007394, intron 10 of 11)	-91570	NM_001111030	Acvr1c
	chr17-266	chr17	13716806	13716956	+	18.4	0	3' UTR (NM_022311, exon 3 of 3)	-43660	NM_010806	Afdn
	chr16-317	chr16	95341006	95341156	+	18.4	0	Intergenic	83523	NM_001271690	Kcnj15
	chr8-428	chr8	32846208	32846358	+	18.4	0	Intergenic	103743	NM_001177589	Gm3985
	chr1-518	chr1	127577155	127577305	+	18.4	0	intron (NM_028135, intron 2 of 7)	100791	NM_028135	Tmem163
	chr9-180	chr9	104281088	104281238	+	18.4	0	Intergenic	-18233	NM_001163026	Dnajc13
	chr16-275	chr16	20800318	20800468	+	18.4	0	Intergenic	-65882	NM_009379	Thpo
	chr10-206	chr10	112962362	112962512	+	18.4	0	RLTR1B|LTR|ERV1	-33411	NM_001033474	Atxn7l3b
	chr2-580	chr2	130679991	130680141	+	18.4	0	intron (NM_025922, intron 7 of 7)	12225	NM_025922	Itpa
	chr7-279	chr7	6283874	6284024	+	18.4	0	Intergenic	-2631	NM_001024928	Zfp667
	chr4-102	chr4	145037143	145037293	+	18.4	0	intron (NM_001276502, intron 64 of 68)	144081	NM_011303	Dhrs3
	chr15-279	chr15	43717775	43717925	+	18.4	0	Intergenic	152179	NM_175502	Tmem74
	chr8-470	chr8	57939952	57940102	+	18.4	0	intron (NM_175032, intron 6 of 11)	-286972	NM_144731	Galnt7
	chr1-503	chr1	172567880	172568030	+	18.4	0	Intergenic	8049	NR_027644	Vsig8
	chr7-251	chr7	16452774	16452924	+	18.4	0	promoter-TSS (NM_026938)	70	NM_026938	Tmem160
	chr1-508	chr1	45572740	45572890	+	18.4	0	RLTR13B4|LTR|ERVK	-69533	NM_007737	Col5a2
	chr8-407	chr8	83165545	83165695	+	18.4	0	5' UTR (NM_001111304, exon 1 of 21)	268	NM_027758	Tbc1d9
	chr6-374	chr6	142448491	142448641	+	18.4	0	intron (NM_145572, intron 10 of 16)	24543	NM_145572	Gys2
	chr16-296	chr16	58150043	58150193	+	18	0	RLTR30|LTR|ERV1	-258417	NM_028523	Dcbld2
	chr11-275	chr11	117991727	117991877	+	18	0	intron (NM_133757, intron 1 of 9)	4945	NM_133757	Pgs1
	chr2-604	chr2	109921688	109921838	+	18	0	intron (NM_172671, intron 1 of 17)	4116	NM_172671	Lgr4
	chr14-185	chr14	47303476	47303626	+	18	0	intron (NM_178684, intron 1 of 3)	5237	NM_178684	Mapk1ip1l
	chr19-225	chr19	58275426	58275576	+	18	0	intron (NR_104342, intron 6 of 11)	-20703	NR_040449	Gm10007
	chr7-237	chr7	49842946	49843096	+	18	0	intron (NM_133740, intron 13 of 15)	64663	NM_133740	Prmt3
	chr1-513	chr1	77227135	77227285	+	18	0	Intergenic	269558	NR_105770	Mir6352
	chr13-261	chr13	114288453	114288603	+	18	0	3' UTR (NM_010887, exon 5 of 5)	99566	NM_010887	Ndufs4
	chr2-526	chr2	59382572	59382722	+	18	0	non-coding (NR_040510, exon 3 of 3)	4035	NR_040510	5330411J11Rik
	chr4-126	chr4	136310775	136310925	+	18	0	promoter-TSS (NM_001277123)	-92	NM_001277122	Hnrnpr
	chr5-275	chr5	70573641	70573791	+	18	0	B4A|SINE|B4	268901	NM_010252	Gabrg1
	chr9-169	chr9	58055749	58055899	+	18	0	intron (NM_001311085, intron 11 of 18)	23550	NM_001243265	Gm16130
	chr8-401	chr8	94307367	94307517	+	18	0	intron (NM_172410, intron 17 of 22)	-16869	NR_029552	Mir138-2
	chr7-233	chr7	27490873	27491023	+	18	0	TTS (NM_018820)	3995	NM_018820	Sertad1
	chr2-586	chr2	167850130	167850280	+	18	0	RSINE1|SINE|B4	-82122	NM_011201	Ptpn1
	chr5-329	chr5	90764102	90764252	+	18	0	Intergenic	-4341	NM_023785	Ppbp
	chr13-288	chr13	20237252	20237402	+	18	0	ORR1E|LTR|ERVL-MaLR	146820	NM_080288	Elmo1
	chr17-310	chr17	86602492	86602642	+	18	0	intron (NM_011104, intron 11 of 14)	-151297	NM_010137	Epas1
	chr11-216	chr11	8569832	8569982	+	18	0	intron (NM_001083587, intron 4 of 30)	94628	NM_001083587	Tns3
	chr6-416	chr6	140477146	140477296	+	18	0	intron (NM_144920, intron 3 of 30)	53122	NM_144920	Plekha5
	chr2-590	chr2	12174838	12174988	+	18	0	intron (NR_138462, intron 23 of 30)	-126333	NR_040353	E030013I19Rik
	chr16-332	chr16	4656005	4656155	+	18	0	intron (NM_030205, intron 7 of 27)	16135	NM_139307	Vasn
	chr3-586	chr3	31885811	31885961	+	18	0	Intergenic	-16817	NM_028231	Kcnmb2
	chr11-228	chr11	16607027	16607177	+	18	0	Intergenic	-98618	NM_001109971	Sec61g
	chr1-500	chr1	170051596	170051746	+	18	0	MIR|SINE|MIR	37273	NM_022563	Ddr2
	chr1-535	chr1	78908107	78908257	+	18	0	Intergenic	91233	NM_021342	Kcne4
	chr8-453	chr8	73233775	73233925	+	18	0	intron (NM_010687, intron 1 of 14)	119690	NM_001317391	Large1
	chr8-443	chr8	124304129	124304279	+	18	0	intron (NM_139272, intron 2 of 15)	72810	NM_139272	Galnt2
	chr12-167	chr12	88967852	88968002	+	18	0	intron (NM_172544, intron 2 of 19)	14537	NM_172544	Nrxn3
	chr2-601	chr2	90565294	90565444	+	18	0	intron (NM_008982, intron 1 of 23)	15278	NM_008982	Ptprj
	chr12-150	chr12	69388591	69388741	+	18	0	Intergenic	16516	NM_007481	Arf6
	chr19-203	chr19	47988029	47988179	+	18	0	intron (NM_001163267, intron 14 of 17)	50392	NM_001163267	Cfap58
	chr6-392	chr6	22332291	22332441	+	18	0	intron (NM_138587, intron 3 of 9)	23715	NM_138587	Fam3c
	chr16-353	chr16	43615943	43616093	+	18	0	intron (NM_181058, intron 6 of 6)	-24637	NR_030576	Mir568
	chr5-324	chr5	12297490	12297640	+	18	0	Intergenic	-85601	NM_028882	Sema3d
	chr17-307	chr17	71994050	71994200	+	18	0	RMER15|LTR|ERVL	212178	NM_030179	Clip4
	chr17-283	chr17	27976383	27976533	+	18	0	intron (NM_001286040, intron 2 of 24)	67152	NM_181413	Anks1
	chr9-224	chr9	111714028	111714178	+	18	0	Intergenic	-23755	NM_001324546	Stac
	chr1-421	chr1	156495157	156495307	+	18	0	Intergenic	-20904	NM_009230	Soat1
	chr5-256	chr5	53009253	53009403	+	18	0	Intergenic	-17036	NR_040413	5033403H07Rik
	chr6-409	chr6	71664586	71664736	+	18	0	Intergenic	-31744	NM_001038695	Kdm3a
	chr3-626	chr3	83080808	83080958	+	18	0	B3|SINE|B2	25345	NM_016784	Plrg1
	chr14-166	chr14	118652133	118652283	+	18	0	intron (NM_001163676, intron 3 of 29)	24723	NM_001163675	Abcc4
	chr1-507	chr1	39410241	39410391	+	18	0	intron (NM_018775, intron 2 of 19)	42465	NM_001252218	Rpl31
	chr7-282	chr7	30121726	30121876	+	17.6	0	promoter-TSS (NM_001081007)	-147	NM_001081007	Zfp382
	chr2-743	chr2	172412609	172412759	+	17.6	0	intron (NM_001080820, intron 1 of 6)	18890	NM_001276423	Cass4
	chr18-105	chr18	38882369	38882519	+	17.6	0	intron (NM_010197, intron 1 of 3)	-10012	NM_001033789	Gm5820
	chr13-310	chr13	60223863	60224013	+	17.6	0	ORR1D1|LTR|ERVL-MaLR	18467	NR_036449	Gm5084
	chr19-242	chr19	34192596	34192746	+	17.6	0	CpG	401	NM_029682	Stambpl1
	chr11-308	chr11	113096789	113096939	+	17.6	0	intron (NR_015556, intron 1 of 2)	104974	NR_015556	2610035D17Rik
	chr18-106	chr18	40064619	40064769	+	17.6	0	Intergenic	154705	NM_023311	Yipf5
	chr6-414	chr6	134990709	134990859	+	17.6	0	Intergenic	8783	NM_001109914	Apold1
	chr15-285	chr15	90814010	90814160	+	17.6	0	Intergenic	84391	NR_033583	Spn-ps
	chr10-226	chr10	128589648	128589798	+	17.6	0	promoter-TSS (NM_010153)	-222	NM_010153	Erbb3
	chr8-462	chr8	14114096	14114246	+	17.6	0	intron (NM_001145965, intron 1 of 14)	18296	NM_172910	Dlgap2
	chr1-432	chr1	40183654	40183804	+	17.6	0	Intergenic	-41351	NM_008362	Il1r1
	chr13-314	chr13	5592508	5592658	+	17.6	0	Intergenic	265509	NR_045891	1700016G22Rik
	chr9-240	chr9	6430945	6431095	+	17.6	0	RLTR47|LTR|ERVK	-164473	NM_027942	Ddi1
	chr2-597	chr2	50010608	50010758	+	17.6	0	Intergenic	-55746	NR_033304	Lypd6
	chr6-404	chr6	8352720	8352870	+	17.6	0	intron (NM_001302353, intron 2 of 4)	93507	NM_001302353	Umad1
	chr1-539	chr1	95709014	95709164	+	17.6	0	ORR1D2|LTR|ERVL-MaLR	7429	NR_040479	4930598F16Rik
	chr13-313	chr13	114495886	114496036	+	17.6	0	Intergenic	-37010	NM_008046	Fst
	chr5-359	chr5	150611717	150611867	+	17.6	0	L3|LINE|CR1	-17267	NM_133898	N4bp2l1
	chr16-328	chr16	44651042	44651192	+	17.6	0	MIR|SINE|MIR	-73184	NM_145972	Nepro
	chr11-300	chr11	69073414	69073564	+	17.6	0	TTS (NM_025838)	2680	NM_028336	Tmem107
	chr3-584	chr3	21986543	21986693	+	17.6	0	Intergenic	-90034	NM_030732	Tbl1xr1
	chr4-117	chr4	87648299	87648449	+	17.6	0	Intergenic	157949	NM_001286158	Mllt3
	chr17-273	chr17	62757138	62757288	+	17.6	0	intron (NM_010109, intron 1 of 3)	124104	NM_207654	Efna5
	chr5-390	chr5	150208072	150208222	+	17.6	0	Intergenic	-51783	NM_172887	Fry
	chr5-300	chr5	111958158	111958308	+	17.6	0	Intergenic	-196505	NR_045833	E130006D01Rik
	chr16-336	chr16	13152092	13152242	+	17.6	0	TTS (NM_015769)	42431	NM_015769	Ercc4
	chr6-417	chr6	148211453	148211603	+	17.6	0	promoter-TSS (NR_015615)	-760	NR_015615	4732416N19Rik
	chr7-272	chr7	92189171	92189321	+	17.6	0	intron (NM_011807, intron 13 of 22)	-45724	NM_001243047	Dlg2
	chr9-244	chr9	51963506	51963656	+	17.6	0	promoter-TSS (NM_007996)	21	NM_007996	Fdx1
	chr16-307	chr16	43592084	43592234	+	17.6	0	intron (NM_181058, intron 5 of 6)	-48496	NR_030576	Mir568
	chr19-186	chr19	46305558	46305708	+	17.6	0	promoter-TSS (NM_001177370)	-62	NM_019408	Nfkb2
	chr12-177	chr12	91066645	91066795	+	17.6	0	intron (NM_181815, intron 21 of 25)	20872	NR_045858	5430427M07Rik
	chr3-602	chr3	41564814	41564964	+	17.6	0	promoter-TSS (NM_001130186)	9	NM_001130186	Jade1
	chr13-293	chr13	49755561	49755711	+	17.6	0	Intergenic	73506	NM_172015	Iars
	chr3-554	chr3	159092240	159092390	+	17.6	0	intron (NR_040750, intron 2 of 4)	15951	NR_040750	Gm20752
	chr18-100	chr18	53628545	53628695	+	17.6	0	Intergenic	-19531	NR_040349	Gm19466
	chr1-521	chr1	144913406	144913556	+	17.2	0	RMER19A|LTR|ERVK	-138060	NM_022881	Rgs18
	chr1-586	chr1	58712646	58712796	+	17.2	0	promoter-TSS (NM_207653)	-565	NM_009805	Cflar
	chr1-547	chr1	185863928	185864078	+	17.2	0	intron (NR_030555, intron 4 of 6)	253307	NM_146106	Lyplal1
	chr13-315	chr13	14039541	14039691	+	17.2	0	promoter-TSS (NM_178337)	22	NR_130788	Tbce
	chr7-252	chr7	19508572	19508722	+	17.2	0	promoter-TSS (NM_177692)	-23	NR_138583	Trappc6a
	chr5-295	chr5	92988722	92988872	+	17.2	0	Intergenic	56225	NM_175270	Sowahb
	chr19-228	chr19	20420527	20420677	+	17.2	0	intron (NR_045817, intron 1 of 2)	15314	NR_045817	1500015L24Rik
	chr11-298	chr11	60914090	60914240	+	17.2	0	promoter-TSS (NM_025294)	-373	NM_025294	Natd1
	chr4-139	chr4	114454360	114454510	+	17.2	0	MIRc|SINE|MIR	47711	NM_001085549	Trabd2b
	chr8-458	chr8	114214326	114214476	+	17.2	0	intron (NM_173016, intron 1 of 8)	8761	NM_173016	Vat1l
	chr19-239	chr19	21585894	21586044	+	17.2	0	Intergenic	66822	NM_025423	1110059E24Rik
	chr19-245	chr19	48026796	48026946	+	17.2	0	intron (NM_001163267, intron 16 of 17)	89159	NM_001163267	Cfap58
	chr12-173	chr12	70871485	70871635	+	17.2	0	L1MA8|LINE|L1	46046	NM_028127	Frmd6
	chr11-288	chr11	76879868	76880018	+	17.2	0	Intergenic	-24602	NM_025655	Tmigd1
	chr8-499	chr8	111164093	111164243	+	17.2	0	intron (NM_009149, intron 19 of 25)	-18670	NR_040364	9430091E24Rik
	chr8-455	chr8	83799019	83799169	+	17.2	0	MTEa|LTR|ERVL-MaLR	-57783	NM_001163031	Adgre5
	chr3-617	chr3	22091063	22091213	+	17.2	0	intron (NM_030732, intron 1 of 15)	14486	NM_030732	Tbl1xr1
	chr8-442	chr8	120003015	120003165	+	17.2	0	intron (NM_030209, intron 1 of 14)	10652	NM_001310635	Crispld2
	chr10-244	chr10	95967662	95967812	+	17.2	0	intron (NM_001001932, intron 1 of 28)	27074	NM_001001932	Eea1
	chr6-462	chr6	99095490	99095640	+	17.2	0	intron (NM_001347345, intron 5 of 19)	-67267	NM_001197322	Foxp1
	chr15-286	chr15	93195500	93195650	+	17.2	0	Intergenic	79509	NM_001033275	Gxylt1
	chr1-536	chr1	81738559	81738709	+	17.2	0	Intergenic	-393282	NR_105762	Mir6344
	chr1-599	chr1	166981221	166981371	+	17.2	0	L1MEc|LINE|L1	18434	NR_037988	Gm16701
	chr5-387	chr5	149209453	149209603	+	17.2	0	intron (NM_001013378, intron 7 of 9)	24968	NM_001115149	Uspl1
	chr6-498	chr6	134802712	134802862	+	17.2	0	Intergenic	-10159	NM_001048054	Dusp16
	chr15-336	chr15	10898853	10899003	+	17.2	0	ID_B1|SINE|B4	-53404	NM_030888	C1qtnf3
	chr7-257	chr7	118932054	118932204	+	17.2	0	L1MEi|LINE|L1	63082	NM_022420	Gprc5b
	chr16-309	chr16	50503750	50503900	+	17.2	0	Intergenic	-22420	NR_040380	G730013B05Rik
	chr7-255	chr7	40674653	40674803	+	17.2	0	promoter-TSS (NR_045504)	-9	NR_045504	4933402C06Rik
	chr8-541	chr8	94541227	94541377	+	17.2	0	intron (NM_153507, intron 1 of 15)	8274	NM_153507	Cpne2
	chr17-334	chr17	51951543	51951693	+	17.2	0	intron (NR_045095, intron 2 of 2)	68891	NR_045095	Gm20098
	chr17-313	chr17	11570443	11570593	+	17.2	0	intron (NM_016694, intron 6 of 11)	312671	NR_045808	D17Ertd648e
	chr6-480	chr6	47186874	47187024	+	17.2	0	intron (NM_001004357, intron 20 of 23)	-57447	NM_025771	Cntnap2
	chr15-313	chr15	43136370	43136520	+	17.2	0	intron (NM_172815, intron 2 of 5)	34373	NM_172815	Rspo2
	chr1-571	chr1	152669570	152669720	+	17.2	0	intron (NM_001346118, intron 2 of 18)	-44428	NM_016846	Rgl1
	chr2-615	chr2	145453983	145454133	+	17.2	0	intron (NM_053195, intron 3 of 16)	100924	NM_001037929	Gm14092
	chr13-329	chr13	116947731	116947881	+	17.2	0	intron (NM_001081009, intron 3 of 26)	77710	NM_001081009	Parp8
	chr6-479	chr6	37252725	37252875	+	17.2	0	intron (NM_001347104, intron 1 of 32)	47176	NM_001081206	Dgki
	chr19-232	chr19	53649892	53650042	+	17.2	0	MTEa|LTR|ERVL-MaLR	-27339	NM_001170847	Rbm20
	chr8-481	chr8	109958193	109958343	+	17.2	0	MIRc|SINE|MIR	3937	NM_212447	Marveld3
	chr1-602	chr1	193576221	193576371	+	17.2	0	Intergenic	-68766	NR_029592	Mir205
	chr14-191	chr14	87861337	87861487	+	17.2	0	Intergenic	444829	NM_001253755	Tdrd3
	chr6-458	chr6	66969635	66969785	+	17.2	0	intron (NM_001177560, intron 3 of 4)	-66889	NR_040278	E230016M11Rik
	chr2-657	chr2	49909816	49909966	+	17.2	0	intron (NM_027990, intron 4 of 9)	122205	NM_027990	Lypd6b
	chr9-243	chr9	28625057	28625207	+	17.2	0	intron (NM_177906, intron 2 of 7)	833863	NM_177906	Opcml
	chr10-194	chr10	111658764	111658914	+	17.2	0	Intergenic	-64566	NR_045344	4933440J02Rik
	chr15-302	chr15	93595891	93596041	+	17.2	0	promoter-TSS (NM_001033217)	-75	NM_001033217	Prickle1
	chr19-205	chr19	9053123	9053273	+	17.2	0	intron (NM_001286518, intron 6 of 6)	34758	NM_011681	Scgb1a1
	chr19-241	chr19	31114954	31115104	+	17.2	0	intron (NM_011160, intron 3 of 17)	32188	NM_031249	Cstf2t
	chr8-480	chr8	106185865	106186015	+	17.2	0	MER96|DNA|hAT-Tip100	17065	NM_178798	Slc7a6
	chr8-496	chr8	72260663	72260813	+	17.2	0	Intergenic	20720	NM_007456	Ap1m1
	chr1-549	chr1	189726383	189726533	+	17.2	0	MIRb|SINE|MIR	-1810	NM_008976	Ptpn14
	chr16-338	chr16	34782886	34783036	+	17.2	0	Intergenic	-1989	NM_139300	Mylk
	chr2-653	chr2	31791923	31792073	+	16.8	0	intron (NM_001283045, intron 6 of 10)	18582	NM_183424	Qrfp
	chr15-333	chr15	91049013	91049163	+	16.8	0	intron (NM_001109040, intron 1 of 36)	863	NM_001109041	Kif21a
	chr19-247	chr19	57398910	57399060	+	16.8	0	RLTR19|LTR|ERVK	37976	NM_145505	Fam160b1
	chr13-301	chr13	97599145	97599295	+	16.8	0	Intergenic	39220	NR_046157	Gm5086
	chr16-331	chr16	95074726	95074876	+	16.8	0	Intergenic	-77105	NM_010606	Kcnj6
	chr3-665	chr3	96675393	96675543	+	16.8	0	MIRb|SINE|MIR	5337	NM_001081139	Ankrd35
	chr2-632	chr2	60632915	60633065	+	16.8	0	intron (NM_021359, intron 8 of 14)	40703	NM_021359	Itgb6
	chr17-338	chr17	66416898	66417048	+	16.8	0	intron (NM_001114098, intron 3 of 14)	32777	NM_172963	Mtcl1
	chr14-225	chr14	32410167	32410317	+	16.8	0	intron (NM_009891, intron 15 of 15)	-21869	NM_001034037	1700024G13Rik
	chr8-489	chr8	16093190	16093340	+	16.8	0	intron (NM_053171, intron 28 of 69)	75573	NR_037214	Mir3106
	chr7-269	chr7	58666791	58666941	+	16.8	0	RLTR42-int|LTR|ERVK	8664	NM_009728	Atp10a
	chr15-325	chr15	31631704	31631854	+	16.8	0	Intergenic	29663	NM_026546	Fam173b
	chr17-362	chr17	15801448	15801598	+	16.8	0	Intergenic	25063	NM_178615	Rgmb
	chr3-640	chr3	147968144	147968294	+	16.8	0	UCON10|Unknown|Unknown	986416	NM_001081298	Adgrl2
	chr3-673	chr3	152872675	152872825	+	16.8	0	intron (NM_012028, intron 2 of 4)	109457	NM_012028	St6galnac5
	chr8-528	chr8	24383801	24383951	+	16.8	0	Intergenic	55070	NM_026931	1810011O10Rik
	chr1-568	chr1	135699019	135699169	+	16.8	0	Intergenic	-30103	NM_007791	Csrp1
	chr17-317	chr17	29437350	29437500	+	16.8	0	CpG	-53620	NM_008842	Pim1
	chr13-364	chr13	47352816	47352966	+	16.8	0	Intergenic	158888	NM_001170643	Rnf144b
	chr5-331	chr5	101816860	101817010	+	16.8	0	intron (NM_173370, intron 11 of 12)	51805	NM_173370	Cds1
	chr8-533	chr8	65781236	65781386	+	16.8	0	intron (NM_175188, intron 1 of 7)	162786	NM_175188	2020-03-01
	chr11-323	chr11	65352731	65352881	+	16.8	0	Intergenic	-64973	NR_040280	Gm12295
	chr2-691	chr2	48567948	48568098	+	16.8	0	MamTip3|DNA|hAT-Tip100	-246086	NM_007396	Acvr2a
	chr6-492	chr6	89687309	89687459	+	16.8	0	MYSERV6-int|LTR|ERVK	-26819	NM_053228	Vmn1r40
	chr16-367	chr16	73105617	73105767	+	16.8	0	Intergenic	442543	NM_019413	Robo1
	chr8-501	chr8	120125009	120125159	+	16.8	0	intron (NM_172286, intron 1 of 12)	10932	NM_001163761	6430548M08Rik
	chr6-481	chr6	47564877	47565027	+	16.8	0	MERVL_2A-int|LTR|ERVL	30078	NM_007971	Ezh2
	chr15-268	chr15	38197980	38198130	+	16.8	0	Intergenic	-21148	NM_008757	Odf1
	chr7-286	chr7	46639782	46639932	+	16.8	0	promoter-TSS (NM_013789)	-50	NM_013789	Sergef
	chr19-295	chr19	42948242	42948392	+	16.8	0	intron (NM_001081257, intron 6 of 11)	-168341	NM_019424	Hps1
	chr5-318	chr5	135914301	135914451	+	16.8	0	intron (NM_018871, intron 1 of 1)	20265	NM_018871	Ywhag
	chr16-370	chr16	86142856	86143006	+	16.8	0	Intergenic	-241806	NM_011782	Adamts5
	chr17-316	chr17	24035162	24035312	+	16.8	0	RLTR30D2_MM|LTR|ERV1	-3006	NM_175440	Prss27
	chr1-563	chr1	100118892	100119042	+	16.8	0	B4A|SINE|B4	346202	NM_172851	Cntnap5b
	chr17-410	chr17	93313850	93314000	+	16.8	0	Intergenic	114757	NM_009625	Adcyap1
	chr1-595	chr1	149947062	149947212	+	16.8	0	intron (NM_008869, intron 1 of 17)	14153	NM_008869	Pla2g4a
	chr9-272	chr9	24227845	24227995	+	16.8	0	MIR|SINE|MIR	129902	NM_175678	Npsr1
	chr5-327	chr5	66034502	66034652	+	16.8	0	intron (NM_178446, intron 3 of 6)	-30292	NR_027961	9130230L23Rik
	chr10-217	chr10	84481014	84481164	+	16.8	0	Intergenic	-7204	NR_108059	4930463O16Rik
	chr9-277	chr9	50845633	50845783	+	16.8	0	Intergenic	-11216	NM_001034085	Ppp2r1b
	chr14-192	chr14	100171240	100171390	+	16.4	0	Intergenic	-21519	NM_010636	Klf12
	chr18-151	chr18	73898338	73898488	+	16.4	0	Intergenic	39028	NM_001305882	Mro
	chr9-281	chr9	99568844	99568994	+	16.4	0	promoter-TSS (NM_001166138)	-20	NM_028768	Armc8
	chr15-312	chr15	40969909	40970059	+	16.4	0	Lx8|LINE|L1	314942	NM_011766	Zfpm2
	chr9-257	chr9	30653390	30653540	+	16.4	0	Intergenic	226136	NM_028874	Snx19
	chr11-363	chr11	114636707	114636857	+	16.4	0	intron (NR_037269, intron 2 of 4)	-31761	NM_023372	Rpl38
	chr10-262	chr10	112788340	112788490	+	16.4	0	MLT1H|LTR|ERVL-MaLR	61489	NR_040579	1700010J16Rik
	chr13-358	chr13	3918146	3918296	+	16.4	0	promoter-TSS (NM_019671)	-1	NM_019671	Net1
	chr8-505	chr8	4319272	4319422	+	16.4	0	RMER4A|LTR|ERVK	5753	NM_010485	Elavl1
	chr8-538	chr8	89299788	89299938	+	16.4	0	Intergenic	-255701	NM_021390	Sall1
	chr6-487	chr6	72896711	72896861	+	16.4	0	MER58B|DNA|hAT-Charlie	2506	NM_001347231	Kcmf1
	chr3-720	chr3	116985298	116985448	+	16.4	0	TTS (NR_040596)	-16421	NM_023245	Palmd
	chr2-700	chr2	110129907	110130057	+	16.4	0	Intergenic	-79503	NR_040508	Ccdc34os
	chr3-686	chr3	85050839	85050989	+	16.4	0	Intergenic	98703	NM_080428	Fbxw7
	chr9-241	chr9	15670324	15670474	+	16.4	0	Intergenic	-39370	NM_172289	Slc36a4
	chr14-212	chr14	83243922	83244072	+	16.4	0	Intergenic	-1199566	NM_001013753	Pcdh17
	chr16-395	chr16	33908383	33908533	+	16.4	0	intron (NM_010580, intron 8 of 14)	58545	NM_009471	Umps
	chr12-254	chr12	90236176	90236326	+	16.4	0	intron (NM_001252074, intron 5 of 6)	423768	NM_001252074	Nrxn3
	chr8-492	chr8	53857741	53857891	+	16.4	0	Intergenic	-218751	NM_146208	Neil3
	chr2-722	chr2	70444198	70444348	+	16.4	0	Intergenic	-30650	NM_022435	Sp5
	chr1-605	chr1	24553552	24553702	+	16.4	0	intron (NM_007733, intron 4 of 50)	33810	NM_007733	Col19a1
	chr7-303	chr7	6913809	6913959	+	16.4	0	intron (NM_001290994, intron 4 of 8)	62778	NR_036631	Zim3
	chr5-347	chr5	105500492	105500642	+	16.4	0	Intergenic	-18904	NM_133897	Lrrc8c
	chr3-739	chr3	58714254	58714404	+	16.4	0	intron (NR_045167, intron 2 of 7)	21740	NR_045167	4930593A02Rik
	chr12-148	chr12	57021496	57021646	+	16.4	0	intron (NM_172577, intron 1 of 9)	139072	NM_001167976	Slc25a21
	chr12-192	chr12	8524479	8524629	+	16.4	0	Intergenic	15012	NM_001038660	Slc7a15
	chr13-389	chr13	119351363	119351513	+	16.4	0	intron (NM_001308506, intron 14 of 16)	57573	NM_008710	Nnt
	chr15-294	chr15	59060648	59060798	+	16.4	0	ID_B1|SINE|B4	21303	NM_001146180	Mtss1
	chr15-272	chr15	80097827	80097977	+	16.4	0	intron (NM_207708, intron 1 of 3)	6568	NM_207708	Syngr1
	chr1-649	chr1	156193502	156193652	+	16.4	0	intron (NM_177838, intron 1 of 4)	11449	NM_177838	Fam163a
	chr3-682	chr3	53353630	53353780	+	16.4	0	Intergenic	109553	NM_172501	Nhlrc3
	chr18-95	chr18	46473424	46473574	+	16.4	0	Intergenic	-7683	NR_045438	Mospd4
	chr19-263	chr19	16997741	16997891	+	16.4	0	intron (NM_181348, intron 1 of 19)	41698	NM_181348	Prune2
	chr6-507	chr6	53562819	53562969	+	16.4	0	L2|LINE|L2	-10480	NM_172728	Creb5
	chr19-260	chr19	56652121	56652271	+	16.4	0	Lx8|LINE|L1	-70176	NM_007419	Adrb1
	chr3-623	chr3	71000362	71000512	+	16.4	0	Intergenic	-193146	NR_040556	Gm6634
	chr15-308	chr15	31374744	31374894	+	16.4	0	Intergenic	-7060	NM_027496	Ankrd33b
	chr16-382	chr16	63871751	63871901	+	16.4	0	Intergenic	-7669	NM_010140	Epha3
	chr7-293	chr7	118484674	118484824	+	16.4	0	TTS (NM_001033380)	7226	NM_001033380	Itpripl2
	chr3-595	chr3	109232533	109232683	+	16.4	0	Intergenic	-108075	NM_020505	Vav3
	chr12-198	chr12	74951309	74951459	+	16.4	0	intron (NM_172805, intron 10 of 10)	225948	NM_172805	Kcnh5
	chr8-465	chr8	34225374	34225524	+	16.4	0	L3|LINE|CR1	-58737	NR_105820	Mir6395
	chr5-371	chr5	77123617	77123767	+	16.4	0	MLT1G|LTR|ERVL-MaLR	-8569	NM_175606	Hopx
	chr2-730	chr2	113639273	113639423	+	16.4	0	intron (NM_001285458, intron 13 of 16)	-45742	NM_001287818	Fmn1
	chr6-442	chr6	93935893	93936043	+	16.4	0	intron (NM_001029850, intron 2 of 23)	-22278	NM_001083320	Magi1
	chr13-359	chr13	19859808	19859958	+	16.4	0	Intergenic	-35626	NM_181754	Gpr141
	chr9-249	chr9	96849274	96849424	+	16.4	0	intron (NM_001289646, intron 3 of 6)	40125	NM_001289646	Pxylp1
	chr3-726	chr3	144593495	144593645	+	16.4	0	intron (NM_053102, intron 3 of 4)	23143	NM_053102	Selenof
	chr8-513	chr8	84067330	84067480	+	16.4	0	CpG	569	NM_009055	Rfx1
	chr8-509	chr8	25101858	25102008	+	16.4	0	promoter-TSS (NM_031257)	-122	NM_031257	Plekha2
	chr8-540	chr8	94323184	94323334	+	16.4	0	Intergenic	-1052	NR_029552	Mir138-2
	chr1-596	chr1	152766528	152766678	+	16.4	0	promoter-TSS (NM_026369)	61	NM_026369	Arpc5
	chr8-522	chr8	8517797	8517947	+	16.4	0	Intergenic	142901	NM_010111	Efnb2
	chr1-616	chr1	125585617	125585767	+	16.4	0	URR1A|DNA|hAT-Charlie	24676	NM_028787	Slc35f5
	chr16-341	chr16	44212840	44212990	+	16.1	0	intron (NM_001029889, intron 7 of 7)	39518	NM_001029889	Usf3
	chr13-382	chr13	70689649	70689799	+	16.1	0	Intergenic	-52090	NM_144837	Ice1
	chr7-308	chr7	49700644	49700794	+	16.1	0	Intergenic	-58387	NM_001146053	Htatip2
	chr15-348	chr15	94263399	94263549	+	16.1	0	Intergenic	16272	NR_045629	D630010B17Rik
	chr15-375	chr15	25940838	25940988	+	16.1	0	promoter-TSS (NM_001277316)	87	NM_025459	Fam134b
	chr19-282	chr19	38970830	38970980	+	16.1	0	Intergenic	-36114	NM_028089	Cyp2c55
	chr15-324	chr15	10796254	10796404	+	16.1	0	Intergenic	-32722	NR_040357	Gm19276
	chr17-363	chr17	26368664	26368814	+	16.1	0	L1ME1|LINE|L1	-46226	NM_001081656	Neurl1b
	chr17-377	chr17	26244279	26244429	+	16.1	0	promoter-TSS (NM_001206335)	-112	NM_001206335	Fam234a
	chr19-256	chr19	40654328	40654478	+	16.1	0	L2a|LINE|L2	-5367	NM_009848	Entpd1
	chr19-272	chr19	60226631	60226781	+	16.1	0	promoter-TSS (NM_029648)	-9	NM_029648	Fam204a
	chr7-337	chr7	5014620	5014770	+	16.1	0	promoter-TSS (NM_001110329)	2	NM_001110328	Fiz1
	chr7-342	chr7	43579981	43580131	+	16.1	0	intron (NM_172482, intron 1 of 3)	470	NM_172482	Zfp719
	chr1-629	chr1	33589524	33589674	+	16.1	0	intron (NM_008922, intron 7 of 13)	80195	NM_008922	Prim2
	chr12-185	chr12	71354917	71355067	+	16.1	0	Intergenic	29216	NR_136902	1700083H02Rik
	chr9-314	chr9	66620678	66620828	+	16.1	0	LTR101_Mam|LTR|ERVL	-27638	NM_001302122	Usp3
	chr12-201	chr12	16161970	16162120	+	16.1	0	Intergenic	-345260	NM_144551	Trib2
	chr3-732	chr3	29822691	29822841	+	16.1	0	Intergenic	-68251	NR_110437	Mannr
	chr2-845	chr2	162182690	162182840	+	16.1	0	intron (NM_001291151, intron 6 of 30)	-208048	NR_040617	Ptprtos
	chr3-706	chr3	30896288	30896438	+	16.1	0	exon (NM_027965, exon 4 of 4)	40413	NM_001286994	Gpr160
	chr6-476	chr6	22417291	22417441	+	16.1	0	RLTR28|LTR|ERVL	-61285	NM_138587	Fam3c
	chr11-389	chr11	49713421	49713571	+	16.1	0	promoter-TSS (NM_212484)	-774	NM_212484	Cnot6
	chr7-347	chr7	89551022	89551172	+	16.1	0	Intergenic	-33511	NM_029614	Prss23
	chr3-741	chr3	62436001	62436151	+	16.1	0	RMER21A|LTR|ERV1	70912	NM_028136	Dhx36
	chr1-611	chr1	72980984	72981134	+	16.1	0	ORR1D1|LTR|ERVL-MaLR	34840	NM_009407	Tnp1
	chr15-361	chr15	54105676	54105826	+	16.1	0	Intergenic	172733	NM_008764	Tnfrsf11b
	chr3-675	chr3	21273752	21273902	+	16.1	0	MLT1F2|LTR|ERVL-MaLR	-802825	NM_030732	Tbl1xr1
	chr3-705	chr3	27881011	27881161	+	16.1	0	ID_B1|SINE|B4	15282	NM_001164437	Tmem212
	chr1-608	chr1	45761194	45761344	+	16.1	0	Intergenic	-34232	NM_028599	Wdr75
	chr7-355	chr7	24841085	24841235	+	16.1	0	TTS (NR_045096)	22365	NR_045096	Gm5893
	chr17-375	chr17	25578987	25579137	+	16.1	0	promoter-TSS (NM_029624)	-112	NM_029624	Lmf1
	chr3-803	chr3	37632302	37632452	+	16.1	0	Intergenic	-7570	NM_001305441	Spry1
	chr5-403	chr5	64878661	64878811	+	16.1	0	Intergenic	53963	NM_030682	Tlr1
	chr5-361	chr5	9338992	9339142	+	16.1	0	intron (NM_172706, intron 1 of 21)	-36637	NR_030537	Mir879
	chr2-720	chr2	48617209	48617359	+	16.1	0	MIR3|SINE|MIR	-196825	NM_007396	Acvr2a
	chr2-772	chr2	160561990	160562140	+	16.1	0	L1ME4b|LINE|L1	-83832	NM_009408	Top1
	chr15-368	chr15	78796704	78796854	+	16.1	0	intron (NM_130859, intron 4 of 20)	6263	NM_130859	Card10
	chr8-531	chr8	45034960	45035110	+	16.1	0	intron (NM_001081286, intron 15 of 25)	30383	NR_033588	AY512931
	chr2-726	chr2	91452597	91452747	+	16.1	0	Intergenic	-4859	NM_172668	Lrp4
	chr1-594	chr1	149895092	149895242	+	16.1	0	intron (NM_001305632, intron 4 of 16)	27272	NM_001305632	Pla2g4a
	chr8-610	chr8	72737044	72737194	+	16.1	0	intron (NM_001113248, intron 5 of 6)	13849	NM_009188	Sin3b
	chr2-732	chr2	124948457	124948607	+	16.1	0	Intergenic	-119595	NM_175034	Slc24a5
	chr9-312	chr9	44379468	44379618	+	16.1	0	promoter-TSS (NM_021395)	53	NM_021395	Hyou1
	chr13-327	chr13	102258370	102258520	+	16.1	0	Intergenic	-435113	NM_008533	Cd180
	chr15-349	chr15	96883792	96883942	+	16.1	0	Intergenic	172089	NM_027052	Slc38a4
	chr8-532	chr8	45036575	45036725	+	16.1	0	intron (NM_001081286, intron 17 of 25)	28768	NR_033588	AY512931
	chr17-352	chr17	47065636	47065786	+	16.1	0	Intergenic	-55179	NM_001177374	Ubr2
	chr11-354	chr11	77686050	77686200	+	16.1	0	promoter-TSS (NM_001024205)	-14	NM_001024205	Nufip2
	chr5-427	chr5	100256598	100256748	+	16.1	0	Intergenic	45981	NR_040679	2310034O05Rik
	chr6-428	chr6	67298841	67298991	+	16.1	0	exon (NM_008354, exon 13 of 16)	31937	NM_025814	Serbp1
	chr6-514	chr6	108216329	108216479	+	16.1	0	intron (NM_010585, intron 2 of 61)	3308	NM_010585	Itpr1
	chr17-337	chr17	60738457	60738607	+	16.1	0	Intergenic	-1725210	NM_026497	Nudt12
	chr7-348	chr7	118841185	118841335	+	16.1	0	TTS (NM_001168218)	14353	NM_001168220	Knop1
	chr5-424	chr5	73344326	73344476	+	16.1	0	Intergenic	-5454	NM_001310636	Ociad2
	chr2-733	chr2	125091651	125091801	+	16.1	0	intron (NM_010852, intron 15 of 15)	23599	NM_175034	Slc24a5
	chr16-390	chr16	20537196	20537346	+	16.1	0	intron (NM_001302970, intron 1 of 10)	1791	NM_009679	Ap2m1
	chr2-795	chr2	68978803	68978953	+	16.1	0	intron (NM_172856, intron 3 of 9)	117437	NM_001347161	Cers6
	chr3-702	chr3	150627047	150627197	+	16.1	0	Intergenic	-810760	NM_133222	Adgrl4
	chr11-367	chr11	3266459	3266609	+	16.1	0	promoter-TSS (NM_007879)	-148	NM_007879	Drg1
	chr8-556	chr8	48222092	48222242	+	16.1	0	Intergenic	112154	NM_001161515	Dctd
	chr12-164	chr12	45733902	45734052	+	16.1	0	Intergenic	-659494	NM_144552	Stxbp6
	chr1-666	chr1	78462793	78462943	+	15.7	0	exon (NM_011811, exon 12 of 17)	26029	NR_102758	Farsb
	chr8-510	chr8	32286724	32286874	+	15.7	0	Intergenic	134904	NR_046039	Gm8179
	chr2-724	chr2	72614381	72614531	+	15.7	0	Intergenic	-89054	NR_040503	8430437L04Rik
	chr11-418	chr11	86867205	86867355	+	15.7	0	intron (NR_106195, intron 4 of 8)	-59620	NM_026191	Dhx40
	chr8-551	chr8	24102398	24102548	+	15.7	0	URR1B|DNA|hAT-Charlie	336473	NM_026931	1810011O10Rik
	chr2-776	chr2	167314040	167314190	+	15.7	0	intron (NM_019835, intron 1 of 8)	35063	NM_019835	B4galt5
	chr8-520	chr8	124271741	124271891	+	15.7	0	intron (NM_139272, intron 1 of 15)	40422	NM_139272	Galnt2
	chr2-782	chr2	24919636	24919786	+	15.7	0	promoter-TSS (NM_001109687)	-102	NM_001109686	Ehmt1
	chr2-745	chr2	179538133	179538283	+	15.7	0	intron (NM_001316723, intron 2 of 5)	95777	NM_009867	Cdh4
	chr4-203	chr4	150837609	150837759	+	15.7	0	intron (NR_040649, intron 3 of 3)	17265	NR_040649	1700045H11Rik
	chr2-769	chr2	146921370	146921520	+	15.7	0	intron (NM_001033298, intron 6 of 13)	65556	NM_001033298	Kiz
	chr4-195	chr4	97344434	97344584	+	15.7	0	Intergenic	-237434	NM_001122952	Nfia
	chr7-374	chr7	139818980	139819130	+	15.7	0	Intergenic	-15119	NM_177469	Adgra1
	chr1-573	chr1	164798713	164798863	+	15.7	0	intron (NM_019759, intron 1 of 3)	2056	NM_019759	Dpt
	chr7-306	chr7	31008960	31009110	+	15.7	0	Intergenic	27114	NM_001242647	Fam187b
	chr14-254	chr14	57348262	57348412	+	15.7	0	intron (NM_030004, intron 3 of 7)	50146	NM_030004	Cryl1
	chr3-781	chr3	105801296	105801446	+	15.7	0	promoter-TSS (NM_145541)	10	NM_145541	Rap1a
	chr18-146	chr18	52478656	52478806	+	15.7	0	intron (NM_026040, intron 3 of 7)	13038	NM_026040	Srfbp1
	chr1-678	chr1	151698368	151698518	+	15.7	0	intron (NM_022018, intron 8 of 13)	-56931	NM_001311165	Edem3
	chr17-388	chr17	86906154	86906304	+	15.7	0	Intergenic	-11119	NM_001277980	Tmem247
	chr3-770	chr3	68564106	68564256	+	15.7	0	Charlie15b|DNA|hAT-Charlie	-8187	NM_013928	Schip1
	chr2-757	chr2	72736841	72736991	+	15.7	0	Intergenic	33406	NR_040503	8430437L04Rik
	chr7-324	chr7	30729480	30729630	+	15.7	0	promoter-TSS (NM_027215)	-21	NM_027215	Tmem147
	chr12-215	chr12	55491888	55492038	+	15.7	0	TTS (NR_035430)	684	NM_010907	Nfkbia
	chr3-733	chr3	30246854	30247004	+	15.7	0	intron (NM_021442, intron 1 of 2)	-233725	NM_007963	Mecom
	chr5-480	chr5	131732707	131732857	+	15.7	0	intron (NM_177047, intron 5 of 18)	-147487	NR_040704	4930563F08Rik
	chr2-766	chr2	128401388	128401538	+	15.7	0	MIR|SINE|MIR	27888	NR_028591	Gm14005
	chr8-577	chr8	36079719	36079869	+	15.7	0	MLT2D|LTR|ERVL	-15034	NM_172911	Prag1
	chr18-126	chr18	46476957	46477107	+	15.7	0	Intergenic	-11216	NR_045438	Mospd4
	chr18-140	chr18	73647850	73648000	+	15.7	0	intron (NM_008540, intron 10 of 11)	55816	NM_008540	Smad4
	chr15-403	chr15	90780908	90781058	+	15.7	0	Intergenic	-101595	NM_001033851	Cpne8
	chr1-698	chr1	52158973	52159123	+	15.7	0	intron (NM_001205313, intron 24 of 24)	39426	NM_001205313	Stat1
	chr8-566	chr8	119881227	119881377	+	15.7	0	Intergenic	18997	NM_146219	Klhl36
	chr2-750	chr2	20968974	20969124	+	15.7	0	non-coding (NR_033225, exon 1 of 2)	175	NR_033225	Gm13375
	chr19-288	chr19	10835612	10835762	+	15.7	0	Intergenic	-5629	NM_009852	Cd6
	chr11-379	chr11	88286238	88286388	+	15.7	0	Intergenic	-7730	NM_028859	Ccdc182
	chr7-388	chr7	82848995	82849145	+	15.7	0	Intergenic	-18263	NM_175366	Mex3b
	chr2-839	chr2	131423679	131423829	+	15.7	0	ORR1F|LTR|ERVL-MaLR	-68108	NM_001177834	Smox
	chr16-354	chr16	56665125	56665275	+	15.7	0	B1_Mur1|SINE|Alu	52250	NM_001252443	Tfg
	chr3-800	chr3	27670186	27670336	+	15.7	0	intron (NM_173182, intron 1 of 25)	40178	NM_173182	Fndc3b
	chr12-188	chr12	109773949	109774099	+	15.7	0	ORR1C1|LTR|ERVL-MaLR	26146	NR_037233	Mir3072
	chr6-525	chr6	47554918	47555068	+	15.7	0	ORR1B2|LTR|ERVL-MaLR	40037	NM_007971	Ezh2
	chr6-550	chr6	87274010	87274160	+	15.7	0	MIRc|SINE|MIR	61690	NM_054041	Antxr1
	chr2-781	chr2	23893936	23894086	+	15.7	0	Intergenic	155368	NM_080462	Hnmt
	chr7-372	chr7	119023376	119023526	+	15.7	0	Intergenic	-28240	NM_001195774	Gprc5b
	chr8-622	chr8	40296550	40296700	+	15.7	0	Intergenic	-9672	NM_030610	Fgf20
	chr4-216	chr4	3626859	3627009	+	15.7	0	RLTR30D2_MM|LTR|ERV1	-29572	NR_040643	2210414B05Rik
	chr2-756	chr2	58365749	58365899	+	15.7	0	Intergenic	-8066	NM_001111030	Acvr1c
	chr2-787	chr2	39092111	39092261	+	15.7	0	intron (NM_178778, intron 14 of 17)	-26645	NM_029793	Golga1
	chr3-738	chr3	58245360	58245510	+	15.7	0	Intergenic	-81628	NR_040538	1700007F19Rik
	chr14-241	chr14	122017079	122017229	+	15.7	0	ORR1F|LTR|ERVL-MaLR	-17520	NM_001037744	Timm8a2
	chr3-785	chr3	120000552	120000702	+	15.7	0	Intergenic	-217239	NM_019550	Ptbp2
	chr13-395	chr13	56330770	56330920	+	15.7	0	Intergenic	-32055	NR_046061	Gm10782
	chr6-553	chr6	100193896	100194046	+	15.7	0	RMER5|LTR|ERV1	93387	NM_019743	Rybp
	chr1-643	chr1	131730628	131730778	+	15.7	0	Intergenic	-13319	NM_177243	Slc26a9
	chr3-769	chr3	54753584	54753734	+	15.7	0	Intergenic	-1923	NM_019483	Smad9
	chr19-267	chr19	32970748	32970898	+	15.7	0	Intergenic	213246	NM_008960	Pten
	chr1-688	chr1	177336587	177336737	+	15.7	0	ORR1F|LTR|ERVL-MaLR	-87895	NM_011785	Akt3
	chr1-577	chr1	194756557	194756707	+	15.7	0	intron (NM_008882, intron 9 of 31)	136803	NM_008882	Plxna2
	chr1-645	chr1	151009018	151009168	+	15.3	0	Intergenic	-15658	NM_001024720	Hmcn1
	chr7-410	chr7	49699122	49699272	+	15.3	0	Intergenic	-59909	NM_001146053	Htatip2
	chr9-333	chr9	86356031	86356181	+	15.3	0	intron (NM_027394, intron 9 of 9)	108810	NM_027394	Ube2cbp
	chr1-700	chr1	61658015	61658165	+	15.3	0	intron (NM_001081050, intron 1 of 22)	19266	NM_001081050	Pard3b
	chr2-808	chr2	137437754	137437904	+	15.3	0	Intergenic	-321309	NM_013822	Jag1
	chr3-764	chr3	37256142	37256292	+	15.3	0	Intergenic	-23581	NM_021782	Il21
	chr2-798	chr2	91411473	91411623	+	15.3	0	intron (NM_001311144, intron 2 of 8)	33094	NM_175123	1110051M20Rik
	chr17-376	chr17	26054495	26054645	+	15.3	0	intron (NM_001162869, intron 1 of 14)	14607	NM_001162868	Rab11fip3
	chr10-313	chr10	96535561	96535711	+	15.3	0	Intergenic	-81365	NM_007569	Btg1
	chr2-759	chr2	90563618	90563768	+	15.3	0	B4|SINE|B4	16954	NM_008982	Ptprj
	chr7-432	chr7	51832957	51833107	+	15.3	0	Intergenic	-28983	NM_001330608	Gas2
	chr8-602	chr8	36626886	36627036	+	15.3	0	MLT2B3|LTR|ERVL	-13018	NM_015802	Dlc1
	chr9-309	chr9	21751484	21751634	+	15.3	0	Intergenic	8727	NM_026282	Spc24
	chr18-147	chr18	61213276	61213426	+	15.3	0	Intergenic	-1755	NM_007885	Slc26a2
	chr1-711	chr1	106149156	106149306	+	15.3	0	Intergenic	22293	NR_040630	Gm20753
	chr13-439	chr13	63513216	63513366	+	15.3	0	ID4|SINE|ID	52444	NM_008957	Ptch1
	chr16-413	chr16	56696649	56696799	+	15.3	0	intron (NM_019678, intron 6 of 7)	20726	NM_001252443	Tfg
	chr17-403	chr17	51626131	51626281	+	15.3	0	Intergenic	-177937	NR_046166	C330011F03Rik
	chr19-334	chr19	53192213	53192363	+	15.3	0	intron (NM_013758, intron 1 of 15)	48291	NM_013758	Add3
	chr6-567	chr6	18420752	18420902	+	15.3	0	exon (NM_080285, exon 8 of 23)	93998	NM_080285	Cttnbp2
	chr9-344	chr9	14086257	14086407	+	15.3	0	Intergenic	-189969	NM_030261	Sesn3
	chr19-270	chr19	37075803	37075953	+	15.3	0	intron (NM_001290826, intron 7 of 10)	-97965	NR_045329	A330032B11Rik
	chr7-365	chr7	58677081	58677231	+	15.3	0	intron (NM_009728, intron 1 of 20)	18954	NM_009728	Atp10a
	chr3-708	chr3	40688273	40688423	+	15.3	0	MTE2b|LTR|ERVL-MaLR	-20523	NM_178386	Slc25a31
	chr6-609	chr6	135487114	135487264	+	15.3	0	Intergenic	119696	NM_001288627	Emp1
	chr3-725	chr3	142755482	142755632	+	15.3	0	Intergenic	-9690	NM_145546	Gtf2b
	chr1-729	chr1	184708725	184708875	+	15.3	0	Intergenic	-3697	NR_040627	4930488B22Rik
	chr1-719	chr1	144356119	144356269	+	15.3	0	MLT1C|LTR|ERVL-MaLR	-107090	NM_015811	Rgs1
	chr1-737	chr1	24520601	24520751	+	15.3	0	intron (NM_007733, intron 9 of 50)	66761	NM_007733	Col19a1
	chr8-571	chr8	15867307	15867457	+	15.3	0	MER45B|DNA|hAT-Tip100	301456	NR_037214	Mir3106
	chr15-291	chr15	38144836	38144986	+	15.3	0	Intergenic	-66057	NM_001081359	Ubr5
	chr10-258	chr10	72650899	72651049	+	15.3	0	Intergenic	-3872	NM_025635	Zwint
	chr8-589	chr8	88199079	88199229	+	15.3	0	promoter-TSS (NM_001164497)	-59	NM_001164499	Papd5
	chr15-400	chr15	81062097	81062247	+	15.3	0	intron (NM_001082536, intron 2 of 13)	42875	NM_153049	Mkl1
	chr7-387	chr7	65774740	65774890	+	15.3	0	Intergenic	-29237	NR_045301	1810008I18Rik
	chr2-863	chr2	62436265	62436415	+	15.3	0	Intergenic	-24109	NM_001159543	Dpp4
	chr14-230	chr14	31336569	31336719	+	15.3	0	promoter-TSS (NM_009796)	-80	NM_009796	Capn7
	chr8-548	chr8	8810300	8810450	+	15.3	0	Intergenic	-119838	NM_176849	Arglu1
	chr9-350	chr9	77427305	77427455	+	15.3	0	Intergenic	-27964	NR_040378	5730403I07Rik
	chr2-752	chr2	31636160	31636310	+	15.3	0	CpG	-3802	NM_001123362	Prdm12
	chr12-206	chr12	84819408	84819558	+	15.3	0	Charlie7|DNA|hAT-Charlie	46213	NM_028863	Isca2
	chr13-384	chr13	110491196	110491346	+	15.3	0	ORR1B1|LTR|ERVL-MaLR	96227	NM_152804	Plk2
	chr2-864	chr2	65214470	65214620	+	15.3	0	intron (NM_027225, intron 1 of 12)	24081	NM_177025	Cobll1
	chr9-339	chr9	112993097	112993247	+	15.3	0	L1MA4|LINE|L1	593980	NR_040760	AU023762
	chr13-393	chr13	19794647	19794797	+	15.3	0	ORR1B1|LTR|ERVL-MaLR	29535	NM_181754	Gpr141
	chr3-810	chr3	60757401	60757551	+	15.3	0	RMER5|LTR|ERV1	-245309	NM_008772	P2ry1
	chr3-744	chr3	81293330	81293480	+	15.3	0	Intergenic	256989	NM_019971	Pdgfc
	chr14-240	chr14	117584123	117584273	+	15.3	0	intron (NM_001079844, intron 3 of 9)	369649	NR_105747	Mir6239
	chr1-615	chr1	107537139	107537289	+	15.3	0	intron (NM_198028, intron 4 of 7)	8211	NM_198028	Serpinb10
	chr10-333	chr10	86126605	86126755	+	15.3	0	intron (NM_013722, intron 7 of 13)	30826	NR_038024	4930486F22Rik
	chr5-452	chr5	146976795	146976945	+	14.9	0	Intergenic	-13073	NM_001256100	Mtif3
	chr17-420	chr17	51628278	51628428	+	14.9	0	RMER1B|Other|Other	-180084	NR_046166	C330011F03Rik
	chr1-705	chr1	80025992	80026142	+	14.9	0	Intergenic	-167402	NM_009255	Serpine2
	chr7-446	chr7	139822649	139822799	+	14.9	0	Intergenic	-11450	NM_177469	Adgra1
	chr17-432	chr17	33812629	33812779	+	14.9	0	B3A|SINE|B2	2181	NM_030697	Kank3
	chr19-303	chr19	14890830	14890980	+	14.9	0	Intergenic	-292722	NM_001302947	Tle4
	chr13-397	chr13	62932451	62932601	+	14.9	0	Intergenic	-32367	NM_001289926	2010111I01Rik
	chr19-327	chr19	21159841	21159991	+	14.9	0	Intergenic	55206	NR_126458	4930554I06Rik
	chr1-652	chr1	184708128	184708278	+	14.9	0	Intergenic	-4294	NR_040627	4930488B22Rik
	chr15-408	chr15	103306040	103306190	+	14.9	0	Intergenic	4323	NM_030720	Gpr84
	chr3-900	chr3	134184131	134184281	+	14.9	0	MLT1G3-int|LTR|ERVL-MaLR	-52289	NM_001004367	Cxxc4
	chr3-805	chr3	41332588	41332738	+	14.9	0	Intergenic	160536	NR_040385	Platr4
	chr13-316	chr13	15444407	15444557	+	14.9	0	Charlie17b|DNA|hAT-Charlie	-19241	NM_008130	Gli3
	chr13-396	chr13	60290901	60291051	+	14.9	0	Intergenic	85505	NR_036449	Gm5084
	chr10-300	chr10	23156962	23157112	+	14.9	0	intron (NM_010167, intron 8 of 18)	192853	NM_001347372	Eya4
	chr19-318	chr19	57110015	57110165	+	14.9	0	intron (NM_001290813, intron 6 of 20)	8934	NM_001347459	Ablim1
	chr18-171	chr18	84880848	84880998	+	14.9	0	Intergenic	29509	NM_025797	Cyb5a
	chr1-770	chr1	28732984	28733134	+	14.9	0	URR1A|DNA|hAT-Charlie	47193	NM_001013750	Gm597
	chr6-544	chr6	34577549	34577699	+	14.9	0	Intergenic	-20880	NM_001347100	Cald1
	chr3-897	chr3	127493304	127493454	+	14.9	0	intron (NM_001327938, intron 1 of 47)	5736	NM_001327938	Ank2
	chr7-368	chr7	64946336	64946486	+	14.9	0	intron (NM_183087, intron 2 of 9)	-73371	NM_023239	Ndnl2
	chr3-866	chr3	152025237	152025387	+	14.9	0	Intergenic	140588	NM_016867	Gipc2
	chr16-410	chr16	49878937	49879087	+	14.9	0	Lx9|LINE|L1	23358	NM_010581	Cd47
	chr8-597	chr8	14965679	14965829	+	14.9	0	intron (NM_172751, intron 18 of 28)	-45271	NM_029116	Kbtbd11
	chr9-269	chr9	7914739	7914889	+	14.9	0	Intergenic	-41644	NM_007464	Birc3
	chr2-786	chr2	35320730	35320880	+	14.9	0	intron (NM_013515, intron 5 of 6)	16204	NM_013515	Stom
	chr6-586	chr6	28685801	28685951	+	14.9	0	intron (NM_019776, intron 12 of 23)	145871	NM_138682	Lrrc4
	chr13-433	chr13	19433448	19433598	+	14.9	0	Intergenic	-37710	NM_001347485	Stard3nl
	chr12-209	chr12	102014509	102014659	+	14.9	0	Intergenic	38610	NM_016856	Cpsf2
	chr16-460	chr16	94782072	94782222	+	14.9	0	intron (NM_001025584, intron 3 of 4)	74543	NM_001025590	Kcnj6
	chr9-370	chr9	80234174	80234324	+	14.9	0	Lx8|LINE|L1	69215	NM_001039546	Myo6
	chr19-290	chr19	16598980	16599130	+	14.9	0	exon (NM_008137, exon 3 of 7)	163388	NM_008137	Gna14
	chr8-604	chr8	43648380	43648530	+	14.9	0	MLTR31D_MM|LTR|ERVK	17105	NM_145745	Adam34
	chr2-812	chr2	156247438	156247588	+	14.9	0	intron (NM_172674, intron 2 of 17)	50866	NM_172674	Phf20
	chr17-472	chr17	14380013	14380163	+	14.9	0	intron (NM_022315, intron 9 of 12)	18854	NR_027986	4930474M22Rik
	chr7-422	chr7	132259808	132259958	+	14.9	0	intron (NM_029935, intron 5 of 7)	-55781	NR_028578	Gm10584
	chr2-825	chr2	51056194	51056344	+	14.9	0	Intergenic	92842	NM_028810	Rnd3
	chr16-468	chr16	24172793	24172943	+	14.9	0	Intergenic	-184256	NM_009744	Bcl6
	chr11-451	chr11	29677968	29678118	+	14.9	0	RLTR1B|LTR|ERV1	-14855	NM_194053	Rtn4
	chr6-547	chr6	53572584	53572734	+	14.9	0	promoter-TSS (NM_172728)	-715	NM_172728	Creb5
	chr2-794	chr2	68910883	68911033	+	14.9	0	intron (NM_172856, intron 1 of 9)	49517	NM_001347161	Cers6
	chr19-332	chr19	47947192	47947342	+	14.9	0	intron (NM_001163267, intron 3 of 17)	9555	NM_001163267	Cfap58
	chr19-291	chr19	23416793	23416943	+	14.9	0	MIR|SINE|MIR	31454	NM_174857	Mamdc2
	chr14-285	chr14	41019265	41019415	+	14.9	0	RLTR30D2_MM|LTR|ERV1	-5507	NM_001316737	Fam213a
	chr3-836	chr3	36557982	36558132	+	14.9	0	ORR1A2-int|LTR|ERVL-MaLR	5451	NM_019393	Exosc9
	chr19-287	chr19	7083516	7083666	+	14.9	0	intron (NM_134147, intron 3 of 10)	22138	NM_201411	Flrt1
	chr3-730	chr3	14786568	14786718	+	14.9	0	intron (NM_009799, intron 1 of 7)	-8183	NM_001083957	Car1
	chr1-803	chr1	190128834	190128984	+	14.9	0	intron (NM_008937, intron 4 of 4)	41771	NM_008937	Prox1
	chr16-437	chr16	87007465	87007615	+	14.9	0	Intergenic	-346645	NM_001159331	N6amt1
	chr8-673	chr8	124924353	124924503	+	14.9	0	intron (NM_053207, intron 1 of 4)	24826	NM_053207	Egln1
	chr16-428	chr16	30248353	30248503	+	14.9	0	Intergenic	19104	NM_027904	Cpn2
	chr11-465	chr11	88070565	88070715	+	14.9	0	intron (NM_016686, intron 1 of 5)	2361	NM_016686	Vezf1
	chr6-603	chr6	112840581	112840731	+	14.9	0	intron (NM_080448, intron 1 of 21)	106610	NM_080448	Srgap3
	chr1-676	chr1	137560720	137560870	+	14.9	0	Intergenic	-405660	NR_029795	Mir181a-1
	chr5-464	chr5	64241858	64242008	+	14.9	0	intron (NM_001289514, intron 1 of 18)	11576	NM_001289514	Tbc1d1
	chr8-605	chr8	46781136	46781286	+	14.9	0	intron (NM_008391, intron 1 of 8)	41466	NM_008391	Irf2
	chr2-836	chr2	121588074	121588224	+	14.9	0	intron (NM_172673, intron 2 of 14)	81426	NM_001290986	Wdr76
	chr2-696	chr2	79924681	79924831	+	14.9	0	MIR|SINE|MIR	-16357	NM_001009978	Pde1a
	chr11-440	chr11	73326013	73326163	+	14.9	0	Intergenic	-1451	NM_023113	Aspa
	chr2-725	chr2	84319234	84319384	+	14.9	0	Intergenic	105957	NM_018782	Calcrl
	chr4-207	chr4	40311084	40311234	+	14.9	0	Intergenic	-2073	NR_040663	4930509K18Rik
	chr6-610	chr6	137602777	137602927	+	14.9	0	intron (NM_007945, intron 1 of 21)	-31843	NM_001271587	Eps8
	chr1-625	chr1	193590454	193590604	+	14.9	0	Intergenic	-82999	NR_029592	Mir205
	chr1-689	chr1	9565259	9565409	+	14.9	0	intron (NR_027664, intron 11 of 12)	17288	NR_027664	Adhfe1
	chr2-903	chr2	72881592	72881742	+	14.9	0	Intergenic	-67950	NR_102349	6430710C18Rik
	chr15-418	chr15	67019293	67019443	+	14.9	0	Intergenic	-49727	NM_008681	Ndrg1
	chr8-611	chr8	84076992	84077142	+	14.9	0	intron (NM_009055, intron 2 of 20)	-9032	NR_030490	Mir709
	chr7-371	chr7	111779974	111780124	+	14.9	0	promoter-TSS (NM_173739)	-72	NM_173739	Galnt18
	chr8-617	chr8	3417373	3417523	+	14.9	0	RSINE1|SINE|B4	24440	NM_133962	Arhgef18
	chr9-345	chr9	31009526	31009676	+	14.9	0	Intergenic	-21043	NM_001115130	Zbtb44
	chr1-786	chr1	136556010	136556160	+	14.9	0	Intergenic	-68816	NM_177643	Zfp281
	chr5-470	chr5	88656215	88656365	+	14.9	0	Intergenic	19290	NM_001098476	Grsf1
	chr9-361	chr9	21133195	21133345	+	14.9	0	ORR1D1|LTR|ERVL-MaLR	-1995	NM_001205312	Tyk2
	chr19-333	chr19	52347717	52347867	+	14.9	0	Lx8|LINE|L1	83495	NM_008386	Ins1
	chr11-435	chr11	55365373	55365523	+	14.9	0	Intergenic	-53191	NM_001029988	Fat2
	chr11-424	chr11	116168105	116168255	+	14.9	0	promoter-TSS (NM_172571)	-2	NM_172571	Fbf1
	chr3-839	chr3	58581593	58581743	+	14.9	0	intron (NM_001040396, intron 1 of 5)	5010	NM_001040396	Selenot
	chr13-367	chr13	97504975	97505125	+	14.9	0	Intergenic	22349	NR_110431	Lncenc1
	chr1-804	chr1	192689594	192689744	+	14.9	0	intron (NM_144881, intron 8 of 11)	81550	NM_144881	Hhat
	chr16-458	chr16	91246393	91246543	+	14.9	0	Intergenic	20918	NM_016967	Olig2
	chr8-680	chr8	25699678	25699828	+	14.5	0	intron (NM_001081269, intron 16 of 22)	-20295	NR_121642	Plpp5
	chr7-468	chr7	109669827	109669977	+	14.5	0	Intergenic	-33835	NM_020616	Akip1
	chr2-965	chr2	134819309	134819459	+	14.5	0	intron (NM_019677, intron 2 of 32)	33220	NM_001145830	Plcb1
	chr1-792	chr1	157506720	157506870	+	14.5	0	promoter-TSS (NM_033354)	-1	NM_033354	Sec16b
	chr5-494	chr5	98226895	98227045	+	14.5	0	Lx8b|LINE|L1	-27214	NM_010203	Fgf5
	chr19-341	chr19	7081598	7081748	+	14.5	0	ID_B1|SINE|B4	24056	NM_201411	Flrt1
	chr1-667	chr1	79439947	79440097	+	14.5	0	promoter-TSS (NM_009129)	68	NM_009129	Scg2
	chr15-413	chr15	31617486	31617636	+	14.5	0	TTS (NM_026546)	15445	NM_026546	Fam173b
	chr11-511	chr11	116247301	116247451	+	14.5	0	intron (NM_146032, intron 13 of 15)	-9285	NM_025276	Evpl
	chr9-377	chr9	110654147	110654297	+	14.5	0	promoter-TSS (NM_183276)	-61	NM_183276	Nbeal2
	chr10-350	chr10	66823218	66823368	+	14.5	0	Lx8|LINE|L1	97091	NR_138560	1110002J07Rik
	chr16-432	chr16	51879062	51879212	+	14.5	0	Intergenic	-152412	NM_001033238	Cblb
	chr10-307	chr10	78092738	78092888	+	14.5	0	Intergenic	23445	NM_015790	Icosl
	chr1-793	chr1	159234623	159234773	+	14.5	0	MTD|LTR|ERVL-MaLR	2372	NM_011931	Rfwd2
	chr7-463	chr7	80375431	80375581	+	14.5	0	Intergenic	-4131	NM_172903	Man2a2
	chr15-384	chr15	85703474	85703624	+	14.5	0	promoter-TSS (NR_110483)	-224	NR_110483	Lncppara
	chr10-322	chr10	31636102	31636252	+	14.5	0	MLT1A1-int|LTR|ERVL-MaLR	-26452	NM_001146349	Rnf217
	chr8-568	chr8	7472257	7472407	+	14.5	0	Intergenic	1188441	NM_010111	Efnb2
	chr9-385	chr9	35467531	35467681	+	14.5	0	intron (NM_021339, intron 7 of 18)	15530	NM_021339	Cdon
	chr16-480	chr16	76352753	76352903	+	14.5	0	intron (NM_173440, intron 1 of 3)	20221	NM_173440	Nrip1
	chr1-809	chr1	20470915	20471065	+	14.5	0	intron (NM_153179, intron 35 of 66)	114536	NR_045734	4930486I03Rik
	chr5-457	chr5	31628723	31628873	+	14.5	0	intron (NM_153196, intron 7 of 7)	14847	NM_025796	Mrpl33
	chr6-614	chr6	22268220	22268370	+	14.5	0	Intergenic	-19932	NM_053116	Wnt16
	chr11-453	chr11	49084923	49085073	+	14.5	0	intron (NM_001271677, intron 1 of 2)	-2019	NM_001271676	Ifi47
	chr4-234	chr4	59748436	59748586	+	14.5	0	intron (NM_001015681, intron 3 of 3)	35344	NM_001013577	Inip
	chr9-388	chr9	70657247	70657397	+	14.5	0	promoter-TSS (NM_172772)	-148	NM_172772	Fam63b
	chr3-760	chr3	21861374	21861524	+	14.5	0	MIR3|SINE|MIR	-215203	NM_030732	Tbl1xr1
	chr3-838	chr3	52199569	52199719	+	14.5	0	Intergenic	-68693	NM_019739	Foxo1
	chr15-461	chr15	74120619	74120769	+	14.5	0	Intergenic	-281023	NM_001033365	Mroh5
	chr18-159	chr18	56724095	56724245	+	14.5	0	intron (NM_010721, intron 1 of 10)	16357	NM_010721	Lmnb1
	chr5-460	chr5	43801963	43802113	+	14.5	0	Charlie9|DNA|hAT-Charlie	-16855	NM_009763	Bst1
	chr1-769	chr1	20477742	20477892	+	14.5	0	intron (NM_153179, intron 35 of 66)	121363	NR_045734	4930486I03Rik
	chr7-413	chr7	66222932	66223082	+	14.5	0	MER97b|DNA|hAT-Tip100	113492	NM_001081163	Chsy1
	chr6-620	chr6	51287914	51288064	+	14.5	0	Intergenic	-18079	NR_029719	Mir148a
	chr10-344	chr10	51941307	51941457	+	14.5	0	Intergenic	-81120	NM_001300957	Vgll2
	chr19-294	chr19	41716223	41716373	+	14.5	0	intron (NM_015748, intron 4 of 36)	27558	NM_015748	Slit1
	chr11-492	chr11	67578541	67578691	+	14.5	0	intron (NM_008088, intron 1 of 13)	-7884	NM_001109657	Gas7
	chr3-903	chr3	139886133	139886283	+	14.5	0	Intergenic	-142041	NR_105798	Mir7j
	chr18-168	chr18	65157032	65157182	+	14.5	0	intron (NM_001114386, intron 8 of 30)	-91754	NR_029600	Mir122
	chr16-441	chr16	97918947	97919097	+	14.5	0	intron (NM_174847, intron 1 of 13)	3611	NM_174847	C2cd2
	chr1-679	chr1	152669909	152670059	+	14.5	0	intron (NM_001346118, intron 2 of 18)	-44767	NM_016846	Rgl1
	chr2-827	chr2	73540728	73540878	+	14.5	0	MER74B|LTR|ERVL	-11316	NM_153138	Wipf1
	chr2-862	chr2	58456686	58456836	+	14.5	0	intron (NM_007394, intron 10 of 11)	-99003	NM_001111030	Acvr1c
	chr17-440	chr17	85463450	85463600	+	14.5	0	Intergenic	154871	NR_038084	Six3os1
	chr8-621	chr8	35701455	35701605	+	14.5	0	ORR1G|LTR|ERVL-MaLR	-112510	NR_040376	Gm16793
	chr1-911	chr1	64615544	64615694	+	14.5	0	intron (NM_025964, intron 1 of 2)	1549	NM_025964	Mettl21a
	chr19-335	chr19	58582151	58582301	+	14.5	0	Intergenic	-24103	NR_038136	1810007D17Rik
	chr9-405	chr9	31118626	31118776	+	14.5	0	intron (NM_011176, intron 1 of 18)	13098	NM_011176	St14
	chr11-414	chr11	70021303	70021453	+	14.5	0	intron (NM_001109752, intron 1 of 19)	2773	NM_007864	Dlg4
	chr1-740	chr1	51597099	51597249	+	14.5	0	Intergenic	-118775	NM_001310549	Nabp1
	chr8-570	chr8	13668454	13668604	+	14.5	0	intron (NM_009025, intron 1 of 23)	9058	NM_009025	Rasa3
	chr5-465	chr5	74193721	74193871	+	14.5	0	Intergenic	-1530	NM_026878	Rasl11b
	chr1-694	chr1	22118515	22118665	+	14.5	0	Intergenic	-155940	NM_001310477	Kcnq5
	chr3-875	chr3	52784663	52784813	+	14.5	0	Intergenic	45014	NR_038079	Gm2447
	chr7-451	chr7	25635429	25635579	+	14.5	0	intron (NM_007533, intron 4 of 8)	7880	NM_146184	B3gnt8
	chr13-461	chr13	58215610	58215760	+	14.5	0	promoter-TSS (NM_152234)	-32	NM_026842	Ubqln1
	chr6-652	chr6	92290990	92291140	+	14.5	0	Intergenic	-46415	NM_009426	Trh
	chr2-877	chr2	113806756	113806906	+	14.5	0	intron (NM_009162, intron 2 of 5)	22260	NM_009162	Scg5
	chr1-697	chr1	40380281	40380431	+	14.5	0	Lx8b|LINE|L1	-49214	NM_001294171	Il1rl1
	chr1-723	chr1	171350680	171350830	+	14.5	0	RSINE1|SINE|B4	5056	NM_011070	Pfdn2
	chr4-180	chr4	54374679	54374829	+	14.5	0	Intergenic	548709	NM_028053	Tmem38b
	chr11-448	chr11	5542190	5542340	+	14.5	0	promoter-TSS (NM_134033)	-48	NM_134033	Ccdc117
	chr14-273	chr14	18779093	18779243	+	14.5	0	intron (NM_144839, intron 3 of 5)	114459	NM_144839	Ube2e2
	chr7-466	chr7	90039631	90039781	+	14.5	0	intron (NR_110365, intron 3 of 5)	10547	NR_110364	E230029C05Rik
	chr8-707	chr8	116500440	116500590	+	14.5	0	MTE2a|LTR|ERVL-MaLR	-4500	NM_029297	Dynlrb2
	chr5-485	chr5	21979871	21980021	+	14.5	0	intron (NM_001310464, intron 32 of 63)	-114342	NM_030727	Slc26a5
	chr1-742	chr1	66788567	66788717	+	14.5	0	intron (NM_177645, intron 2 of 13)	28953	NM_177645	Kansl1l
	chr2-886	chr2	166558271	166558421	+	14.5	0	Intergenic	110895	NR_015558	5031425F14Rik
	chr4-248	chr4	150909799	150909949	+	14.5	0	promoter-TSS (NM_020569)	47	NM_020569	Park7
	chr1-653	chr1	185886998	185887148	+	14.5	0	intron (NR_030555, intron 5 of 6)	230237	NM_146106	Lyplal1
	chr1-749	chr1	132085456	132085606	+	14.5	0	Intergenic	-17469	NM_001114662	Mfsd4a
	chr6-589	chr6	34887142	34887292	+	14.2	0	intron (NM_001013366, intron 11 of 14)	-9152	NM_001135611	3110062M04Rik
	chr17-484	chr17	43232869	43233019	+	14.2	0	Intergenic	-37403	NM_133776	Adgrf1
	chr18-192	chr18	57465434	57465584	+	14.2	0	Intergenic	-2977	NM_001134697	Ctxn3
	chr2-937	chr2	22679987	22680137	+	14.2	0	intron (NM_008078, intron 12 of 15)	25779	NR_039548	Mir3967
	chr16-433	chr16	62784006	62784156	+	14.2	0	intron (NM_178925, intron 2 of 5)	2635	NM_178925	Nsun3
	chr5-553	chr5	76969329	76969479	+	14.2	0	MTEb|LTR|ERVL-MaLR	-5297	NM_025691	Srp72
	chr13-372	chr13	15428889	15429039	+	14.2	0	L1MEi|LINE|L1	-34759	NM_008130	Gli3
	chr12-281	chr12	110737848	110737998	+	14.2	0	promoter-TSS (NM_027149)	-9	NM_001347428	Wdr20
	chr15-442	chr15	73556145	73556295	+	14.2	0	intron (NM_001081066, intron 14 of 22)	40306	NM_001168255	Slc45a4
	chr3-712	chr3	85758028	85758178	+	14.2	0	LTR16A|LTR|ERVL	-11894	NM_172682	Fam160a1
	chr3-896	chr3	125658381	125658531	+	14.2	0	RMER21B|LTR|ERV1	254365	NM_022565	Ndst4
	chr6-671	chr6	43337575	43337725	+	14.2	0	Intergenic	-28096	NM_130869	Nobox
	chr11-519	chr11	43836460	43836610	+	14.2	0	promoter-TSS (NM_007416)	-46	NM_007416	Adra1b
	chr1-743	chr1	66833904	66834054	+	14.2	0	intron (NM_007381, intron 10 of 10)	-16384	NM_001122738	Kansl1l
	chr6-612	chr6	5138944	5139094	+	14.2	0	intron (NM_181595, intron 12 of 15)	54927	NM_011134	Pon1
	chr5-478	chr5	125116036	125116186	+	14.2	0	intron (NM_011424, intron 4 of 46)	63103	NM_001253905	Ncor2
	chr9-409	chr9	56757947	56758097	+	14.2	0	Intergenic	-72769	NM_181074	Lingo1
	chr3-861	chr3	116512311	116512461	+	14.2	0	promoter-TSS (NM_010022)	-693	NM_010022	Dbt
	chr1-880	chr1	155742118	155742268	+	14.2	0	promoter-TSS (NM_010712)	-166	NM_010712	Lhx4
	chr12-335	chr12	102731551	102731701	+	14.2	0	Intergenic	12035	NM_001142937	Moap1
	chr2-792	chr2	61579617	61579767	+	14.2	0	intron (NM_011529, intron 1 of 7)	1106	NM_011529	Tank
	chr1-857	chr1	45573139	45573289	+	14.2	0	RLTR13B4|LTR|ERVK	-69932	NM_007737	Col5a2
	chr13-432	chr13	6634780	6634930	+	14.2	0	B4A|SINE|B4	13916	NM_019703	Pfkp
	chr13-459	chr13	37436597	37436747	+	14.2	0	Intergenic	91327	NM_010745	Ly86
	chr16-435	chr16	75163762	75163912	+	14.2	0	MLT1J|LTR|ERVL-MaLR	422224	NM_001252513	Lipi
	chr3-910	chr3	19984276	19984426	+	14.2	0	intron (NM_001276250, intron 14 of 19)	27297	NM_007752	Cp
	chr10-325	chr10	53421704	53421854	+	14.2	0	Intergenic	-41928	NM_001204983	Cep85l
	chr16-497	chr16	58512573	58512723	+	14.2	0	intron (NM_018784, intron 1 of 10)	10664	NM_018784	St3gal6
	chr7-525	chr7	127017338	127017488	+	14.2	0	promoter-TSS (NM_030240)	-61	NM_030240	Pagr1a
	chr9-415	chr9	69199471	69199621	+	14.2	0	intron (NM_013646, intron 2 of 10)	-90295	NM_001289916	Rora
	chr3-793	chr3	141140879	141141029	+	14.2	0	Intergenic	71401	NM_008811	Pdha2
	chr8-749	chr8	61693001	61693151	+	14.2	0	intron (NM_001081390, intron 8 of 19)	67022	NM_001293773	Palld
	chr11-513	chr11	3754798	3754948	+	14.2	0	intron (NM_152818, intron 2 of 13)	-32646	NM_001302630	Osbp2
	chr1-847	chr1	194852799	194852949	+	14.2	0	Intergenic	-85947	NM_133654	Cd34
	chr3-995	chr3	153671457	153671607	+	14.2	0	intron (NM_011372, intron 1 of 4)	53601	NM_011372	St6galnac3
	chr17-465	chr17	79715782	79715932	+	14.2	0	promoter-TSS (NM_009994)	-816	NM_009994	Cyp1b1
	chr8-704	chr8	110793970	110794120	+	14.2	0	ID_B1|SINE|B4	11879	NM_029646	Il34
	chr18-197	chr18	81585444	81585594	+	14.2	0	Intergenic	406561	NR_039589	Mir5127
	chr3-873	chr3	37919812	37919962	+	14.2	0	ORR1E|LTR|ERVL-MaLR	21074	NR_040559	Gm20755
	chr6-663	chr6	128097584	128097734	+	14.2	0	intron (NM_175414, intron 1 of 8)	45919	NM_175414	Tspan9
	chr9-393	chr9	99132365	99132515	+	14.2	0	intron (NM_029094, intron 1 of 23)	7771	NM_029094	Pik3cb
	chr2-861	chr2	49912677	49912827	+	14.2	0	intron (NM_027990, intron 4 of 9)	125066	NM_027990	Lypd6b
	chr12-262	chr12	75735948	75736098	+	14.2	0	promoter-TSS (NM_030750)	-294	NM_030750	Sgpp1
	chr13-463	chr13	70824039	70824189	+	14.2	0	intron (NM_172053, intron 3 of 22)	17697	NM_172053	Adamts16
	chr16-472	chr16	31878285	31878435	+	14.2	0	promoter-TSS (NM_013900)	-450	NM_013900	Mfi2
	chr6-628	chr6	98640400	98640550	+	14.2	0	Intergenic	-297721	NM_001128092	Gm765
	chr6-615	chr6	22523273	22523423	+	14.2	0	Intergenic	-167267	NM_138587	Fam3c
	chr3-878	chr3	81248416	81248566	+	14.2	0	Intergenic	212075	NM_019971	Pdgfc
	chrX-70	chrX	157434806	157434956	+	14.2	0	Intergenic	-19595	NM_011077	Phex
	chr14-239	chr14	117426157	117426307	+	14.2	0	intron (NM_001079844, intron 2 of 9)	500935	NM_011821	Gpc6
	chr1-829	chr1	144355696	144355846	+	14.2	0	L1ME2|LINE|L1	-106667	NM_015811	Rgs1
	chr2-898	chr2	46054515	46054665	+	14.2	0	Intergenic	357985	NR_040497	1700019E08Rik
	chr1-692	chr1	13779486	13779636	+	14.2	0	Intergenic	7368	NR_004447	Gm5523
	chr19-370	chr19	57808441	57808591	+	14.2	0	Lx9|LINE|L1	197482	NM_181415	Atrnl1
	chr1-731	chr1	191474812	191474962	+	14.2	0	Lx8b|LINE|L1	-77846	NM_144880	Ppp2r5a
	chr5-534	chr5	16867685	16867835	+	14.2	0	Intergenic	313859	NM_001289461	Hgf
	chr8-662	chr8	93813315	93813465	+	14.2	0	non-coding (NR_026888, exon 1 of 1)	165	NR_026888	4930488L21Rik
	chr16-495	chr16	55547184	55547334	+	14.2	0	Tigger7|DNA|TcMar-Tigger	52528	NR_039578	Mir5118
	chr1-764	chr1	191454826	191454976	+	14.2	0	Intergenic	-57860	NM_144880	Ppp2r5a
	chr1-657	chr1	10591340	10591490	+	14.2	0	intron (NM_177834, intron 2 of 10)	128530	NM_001289497	Cpa6
	chr6-701	chr6	141574251	141574401	+	14.2	0	ID_B1|SINE|B4	49940	NM_021471	Slco1c1
	chr11-450	chr11	22930436	22930586	+	14.2	0	intron (NM_144514, intron 2 of 2)	-41494	NM_011663	Zrsr1
	chr19-352	chr19	56292297	56292447	+	14.2	0	MIR|SINE|MIR	4460	NM_146101	Habp2
	chr8-649	chr8	50082376	50082526	+	14.2	0	Intergenic	-285661	NR_046067	Gm2516
	chr12-278	chr12	102183344	102183494	+	14.2	0	intron (NM_172152, intron 2 of 16)	54000	NM_172152	Slc24a4
	chr4-256	chr4	33784693	33784843	+	14.2	0	Intergenic	-139864	NM_007726	Cnr1
	chr7-430	chr7	49668387	49668537	+	14.2	0	Intergenic	-31627	NM_001005232	Dbx1
	chr8-661	chr8	93573922	93574072	+	14.2	0	Intergenic	-38290	NM_001003951	Ces5a
	chr5-533	chr5	16795097	16795247	+	14.2	0	Intergenic	241271	NM_001289461	Hgf
	chr8-710	chr8	122906481	122906631	+	14.2	0	intron (NR_037865, intron 4 of 13)	58182	NM_007662	Cdh15
	chr5-556	chr5	99561528	99561678	+	14.2	0	intron (NR_030692, intron 1 of 3)	167457	NR_030692	A930011G23Rik
	chr1-884	chr1	166807857	166808007	+	14.2	0	Intergenic	-126087	NM_001347135	Fmo9
	chr4-277	chr4	21879763	21879913	+	13.8	0	CpG	163	NM_172687	Coq3
	chr16-447	chr16	41827336	41827486	+	13.8	0	intron (NM_001347236, intron 1 of 6)	294069	NM_175548	Lsamp
	chr10-360	chr10	30729841	30729991	+	13.8	0	RMER1B|Other|Other	73191	NM_172495	Ncoa7
	chr11-524	chr11	67637062	67637212	+	13.8	0	intron (NM_001277080, intron 3 of 12)	40582	NM_001277079	Gas7
	chr12-266	chr12	8674139	8674289	+	13.8	0	promoter-TSS (NM_001160219)	-45	NR_027670	Pum2
	chr16-511	chr16	38304700	38304850	+	13.8	0	intron (NM_001081025, intron 14 of 16)	-9951	NM_001098404	Nr1i2
	chr8-699	chr8	95386196	95386346	+	13.8	0	Intergenic	33975	NM_008609	Mmp15
	chr10-314	chr10	96847913	96848063	+	13.8	0	Intergenic	-187780	NR_045358	4930556N09Rik
	chr1-856	chr1	40515300	40515450	+	13.8	0	promoter-TSS (NM_010553)	13	NM_010553	Il18rap
	chr15-499	chr15	7857418	7857568	+	13.8	0	Intergenic	41943	NM_001301357	Gdnf
	chr10-393	chr10	71361133	71361283	+	13.8	0	intron (NM_027184, intron 1 of 5)	13445	NM_027184	Ipmk
	chr15-502	chr15	25739582	25739732	+	13.8	0	MIR|SINE|MIR	-103641	NM_001034851	Fam134b
	chr15-434	chr15	38661834	38661984	+	13.8	0	promoter-TSS (NM_025494)	5	NM_025494	Atp6v1c1
	chr5-580	chr5	95880987	95881137	+	13.8	0	Intergenic	-75877	NM_018866	Cxcl13
	chr17-426	chr17	67996218	67996368	+	13.8	0	intron (NM_172964, intron 1 of 17)	7815	NM_172964	Arhgap28
	chr17-464	chr17	74796406	74796556	+	13.8	0	intron (NM_152817, intron 12 of 19)	78731	NM_152817	Ttc27
	chr10-481	chr10	116072729	116072879	+	13.8	0	intron (NM_011217, intron 2 of 13)	41113	NM_001161855	4933416C03Rik
	chr16-571	chr16	57456122	57456272	+	13.8	0	intron (NM_001040397, intron 1 of 4)	-93045	NM_001177871	Filip1l
	chr2-986	chr2	17845214	17845364	+	13.8	0	Intergenic	-114221	NM_028757	Nebl
	chr1-813	chr1	52293631	52293781	+	13.8	0	Intergenic	-60474	NM_001113383	Gls
	chr2-1046	chr2	38284968	38285118	+	13.8	0	intron (NM_146122, intron 1 of 21)	2341	NM_146122	Dennd1a
	chr13-420	chr13	62930435	62930585	+	13.8	0	Intergenic	-34383	NM_001289926	2010111I01Rik
	chr19-348	chr19	21152074	21152224	+	13.8	0	Intergenic	47439	NR_126458	4930554I06Rik
	chr5-538	chr5	24704706	24704856	+	13.8	0	intron (NM_016736, intron 11 of 14)	18966	NM_001305264	Nub1
	chr4-222	chr4	115103727	115103877	+	13.8	0	Intergenic	15094	NM_001164557	Pdzk1ip1
	chr14-295	chr14	14865081	14865231	+	13.8	0	intron (NM_001195229, intron 19 of 34)	44341	NM_001195229	Nek10
	chr10-401	chr10	125184200	125184350	+	13.8	0	Intergenic	144260	NM_011391	Slc16a7
	chr16-526	chr16	18424808	18424958	+	13.8	0	intron (NM_001111062, intron 1 of 5)	-1534	NM_013711	Txnrd2
	chr3-907	chr3	158554393	158554543	+	13.8	0	intron (NM_001081358, intron 1 of 27)	7753	NM_001291453	Lrrc7
	chr11-502	chr11	97083807	97083957	+	13.8	0	Intergenic	20114	NR_106181	Mir8103
	chr6-664	chr6	134715791	134715941	+	13.8	0	3' UTR (NM_130447, exon 7 of 7)	74926	NM_026371	Borcs5
	chr9-366	chr9	61326277	61326427	+	13.8	0	Intergenic	-32543	NR_045334	B930092H01Rik
	chr3-1009	chr3	53252996	53253146	+	13.8	0	intron (NM_175386, intron 3 of 3)	210187	NM_172501	Nhlrc3
	chr5-616	chr5	103800394	103800544	+	13.8	0	intron (NM_001080798, intron 3 of 19)	45896	NM_001080798	Aff1
	chr19-369	chr19	55771759	55771909	+	13.8	0	intron (NM_001331150, intron 4 of 14)	30024	NM_001142923	Tcf7l2
	chr17-430	chr17	6467958	6468108	+	13.8	0	Intergenic	-17039	NR_033520	Tmem181b-ps
	chr8-751	chr8	77326283	77326433	+	13.8	0	B2_Mm2|SINE|B2	-190698	NR_028125	0610038B21Rik
	chr1-894	chr1	189440828	189440978	+	13.8	0	B4A|SINE|B4	-38630	NM_001281848	Kcnk2
	chr17-435	chr17	46646123	46646273	+	13.8	0	promoter-TSS (NM_001316742)	-23	NM_001316742	Mrpl2
	chr7-515	chr7	51736291	51736441	+	13.8	0	Intergenic	114536	NM_080853	Slc17a6
	chr4-184	chr4	114627805	114627955	+	13.8	0	Intergenic	-193840	NR_033617	Gm12830
	chr4-281	chr4	56608780	56608930	+	13.8	0	Intergenic	132570	NM_025271	Actl7b
	chr8-609	chr8	72261024	72261174	+	13.8	0	Intergenic	21081	NM_007456	Ap1m1
	chr8-690	chr8	68922740	68922890	+	13.8	0	MER63D|DNA|hAT-Blackjack	42260	NM_008509	Lpl
	chr6-732	chr6	124787122	124787272	+	13.8	0	ORR1A4|LTR|ERVL-MaLR	-7470	NM_001302555	Lrrc23
	chr2-936	chr2	20711093	20711243	+	13.8	0	intron (NM_029895, intron 5 of 18)	191655	NM_001177631	Etl4
	chr1-701	chr1	62976830	62976980	+	13.8	0	Intergenic	137362	NM_001081436	Ino80d
	chr6-641	chr6	5139809	5139959	+	13.8	0	intron (NM_181595, intron 12 of 15)	54062	NM_011134	Pon1
	chr19-377	chr19	12499569	12499719	+	13.8	0	intron (NM_172442, intron 1 of 8)	2352	NM_172442	Dtx4
	chr1-841	chr1	189861194	189861344	+	13.8	0	intron (NM_008976, intron 16 of 18)	61019	NM_026796	Smyd2
	chr15-482	chr15	51156997	51157147	+	13.8	0	Intergenic	238538	NR_045092	Gm19303
	chr8-669	chr8	117256528	117256678	+	13.8	0	promoter-TSS (NM_001163262)	-416	NM_001163262	Cmip
	chr1-833	chr1	165075651	165075801	+	13.8	0	intron (NR_040480, intron 1 of 4)	16204	NR_040480	4930568G15Rik
	chr1-781	chr1	105519327	105519477	+	13.8	0	3' UTR (NM_013784, exon 31 of 31)	144274	NM_013784	Pign
	chr3-906	chr3	144456379	144456529	+	13.8	0	intron (NM_011828, intron 2 of 6)	113762	NM_011828	Hs2st1
	chr5-570	chr5	20682319	20682469	+	13.8	0	intron (NM_001170746, intron 22 of 22)	199730	NM_172992	Phtf2
	chr13-416	chr13	52675699	52675849	+	13.8	0	Intergenic	78892	NM_011518	Syk
	chr16-496	chr16	55964709	55964859	+	13.8	0	B3|SINE|B2	-1491	NM_024218	Rpl24
	chr4-287	chr4	95967097	95967247	+	13.8	0	promoter-TSS (NR_045777)	-137	NR_045777	9530080O11Rik
	chr19-364	chr19	42758501	42758651	+	13.8	0	intron (NM_001346703, intron 17 of 19)	-5801	NM_029011	Pyroxd2
	chr15-458	chr15	67277615	67277765	+	13.8	0	intron (NR_045140, intron 4 of 8)	50921	NR_045140	1700012I11Rik
	chr5-442	chr5	92112816	92112966	+	13.8	0	Intergenic	-25047	NM_019490	Uso1
	chr2-1037	chr2	20385112	20385262	+	13.8	0	MMERGLN-int|LTR|ERV1	95274	NM_001081006	Etl4
	chr2-993	chr2	52364496	52364646	+	13.8	0	ORR1D1|LTR|ERVL-MaLR	-25773	NM_010889	Neb
	chr1-855	chr1	40339436	40339586	+	13.8	0	intron (NM_133193, intron 4 of 10)	14884	NM_133193	Il1rl2
	chr9-412	chr9	61946877	61947027	+	13.8	0	promoter-TSS (NM_024245)	-153	NM_024245	Kif23
	chr1-831	chr1	158343278	158343428	+	13.8	0	intron (NM_207583, intron 1 of 7)	12907	NM_207583	Brinp2
	chr5-551	chr5	64802937	64803087	+	13.8	0	promoter-TSS (NM_008453)	-511	NM_008453	Klf3
	chr19-345	chr19	14466173	14466323	+	13.8	0	intron (NM_001302947, intron 11 of 19)	-27742	NR_003027	Rnu6
	chr6-629	chr6	112628562	112628712	+	13.8	0	intron (NM_001167730, intron 12 of 13)	68033	NM_021385	Rad18
	chr3-1037	chr3	152874824	152874974	+	13.8	0	MIR|SINE|MIR	107308	NM_012028	St6galnac5
	chr1-796	chr1	163392257	163392407	+	13.8	0	intron (NR_132627, intron 5 of 5)	11337	NM_001313738	Gorab
	chr15-466	chr15	84365889	84366039	+	13.8	0	Intergenic	39845	NM_001162500	Parvg
	chr11-568	chr11	76431096	76431246	+	13.8	0	intron (NM_001346670, intron 15 of 21)	24028	NM_019818	Timm22
	chr4-282	chr4	59893637	59893787	+	13.8	0	intron (NM_172468, intron 7 of 8)	21344	NM_021053	Slc46a2
	chr1-824	chr1	119986622	119986772	+	13.8	0	intron (NM_001115074, intron 2 of 22)	8513	NM_001115074	Cfap221
	chr17-581	chr17	13857118	13857268	+	13.8	0	intron (NM_010806, intron 20 of 32)	-91180	NM_001122977	Gm7168
	chr9-417	chr9	95958106	95958256	+	13.8	0	intron (NM_011916, intron 1 of 41)	3421	NM_001311130	Xrn1
	chr12-306	chr12	38854410	38854560	+	13.8	0	intron (NM_001347379, intron 9 of 11)	70774	NM_001163154	Etv1
	chr10-397	chr10	83364157	83364307	+	13.8	0	intron (NM_026579, intron 2 of 3)	4011	NM_026579	D10Wsu102e
	chr5-583	chr5	101524058	101524208	+	13.8	0	Intergenic	140578	NM_144955	Nkx6-1
	chr12-329	chr12	70727541	70727691	+	13.8	0	Intergenic	-97898	NM_028127	Frmd6
	chr17-496	chr17	23979701	23979851	+	13.8	0	Intergenic	-4546	NM_013921	Prss30
	chr1-818	chr1	67925671	67925821	+	13.8	0	Intergenic	802719	NM_001080809	Cps1
	chr13-485	chr13	75367218	75367368	+	13.8	0	RLTR48A|LTR|ERV1	277306	NM_013628	Pcsk1
	chr2-976	chr2	160419345	160419495	+	13.8	0	MTEa|LTR|ERVL-MaLR	-52355	NM_010658	Mafb
	chr9-317	chr9	80026937	80027087	+	13.8	0	Intergenic	-39891	NM_001311110	Senp6
	chr12-293	chr12	102236603	102236753	+	13.8	0	intron (NM_172152, intron 11 of 16)	-46396	NM_177620	Rin3
	chr11-515	chr11	9530938	9531088	+	13.8	0	intron (NM_178259, intron 45 of 61)	339071	NM_178259	Abca13
	chr8-644	chr8	22433336	22433486	+	13.8	0	Intergenic	22071	NM_020560	Mrps31
	chr16-499	chr16	73096746	73096896	+	13.8	0	Intergenic	433672	NM_019413	Robo1
	chr8-618	chr8	8969523	8969673	+	13.8	0	Intergenic	162690	NR_045854	4933430N04Rik
	chr3-956	chr3	56659190	56659340	+	13.8	0	MTD|LTR|ERVL-MaLR	-475564	NM_030595	Nbea
	chr15-477	chr15	32278782	32278932	+	13.8	0	intron (NM_009154, intron 1 of 22)	34044	NM_009154	Sema5a
	chr15-479	chr15	36367409	36367559	+	13.8	0	ORR1E|LTR|ERVL-MaLR	-84337	NM_013923	Rnf19a
	chr14-291	chr14	78060398	78060548	+	13.8	0	Intergenic	28534	NM_177629	Fam216b
	chr8-696	chr8	87182953	87183103	+	13.8	0	MER117|DNA|hAT-Charlie	16822	NR_040697	Gm10637
	chr17-424	chr17	65643057	65643207	+	13.8	0	promoter-TSS (NM_001146002)	-928	NM_001146002	Txndc2
	chr8-658	chr8	86416040	86416190	+	13.8	0	RLTR13D5|LTR|ERVK	150475	NM_172912	Abcc12
	chr9-410	chr9	59659849	59659999	+	13.8	0	intron (NM_001253883, intron 1 of 10)	3556	NM_001253883	Pkm
	chr19-363	chr19	33982106	33982256	+	13.8	0	MTEa-int|LTR|ERVL-MaLR	20933	NM_026334	Lipf
	chr5-516	chr5	93032818	93032968	+	13.8	0	L1MC3|LINE|L1	12129	NM_175270	Sowahb
	chr8-675	chr8	10939329	10939479	+	13.8	0	MTD|LTR|ERVL-MaLR	-10947	NR_135302	3930402G23Rik
	chrX-67	chrX	80800304	80800454	+	13.8	0	Intergenic	-270265	NM_138751	Tmem47
	chr8-657	chr8	85555305	85555455	+	13.8	0	promoter-TSS (NM_019794)	-109	NM_019794	Dnaja2
	chr14-350	chr14	20162540	20162690	+	13.8	0	intron (NM_021542, intron 1 of 4)	19167	NM_021542	Kcnk5
	chr1-805	chr1	194502859	194503009	+	13.8	0	Intergenic	-116895	NM_008882	Plxna2
	chr7-428	chr7	45526258	45526408	+	13.8	0	promoter-TSS (NM_148927)	3	NM_148927	Plekha4
	chr9-435	chr9	49827783	49827933	+	13.8	0	Intergenic	-28465	NM_001311065	Ncam1
	chr3-932	chr3	105151832	105151982	+	13.8	0	Intergenic	85063	NM_029228	4930564D02Rik
	chr11-546	chr11	3482111	3482261	+	13.8	0	Intergenic	-6041	NM_172791	Pla2g3
	chr17-498	chr17	26932997	26933147	+	13.8	0	promoter-TSS (NM_009343)	-55	NM_001302397	Phf1
	chr9-334	chr9	102542717	102542867	+	13.8	0	3' UTR (NM_024291, exon 11 of 11)	36654	NM_024291	Ky
	chr10-340	chr10	12824008	12824158	+	13.8	0	intron (NM_011682, intron 1 of 73)	37652	NM_011682	Utrn
	chr2-1069	chr2	152881282	152881432	+	13.8	0	intron (NM_001141977, intron 9 of 17)	16290	NR_049195	Mir5622
	chr9-416	chr9	95855101	95855251	+	13.8	0	TTS (NM_001271569)	2341	NR_073361	1700065D16Rik
	chr7-526	chr7	127027105	127027255	+	13.8	0	promoter-TSS (NM_010772)	-701	NM_010772	Maz
	chr2-928	chr2	156720862	156721012	+	13.4	0	promoter-TSS (NM_001042488)	-28	NR_040505	4930405A21Rik
	chr15-473	chr15	8586886	8587036	+	13.4	0	Intergenic	123846	NM_148938	Slc1a3
	chr8-740	chr8	126592011	126592161	+	13.4	0	intron (NM_001164598, intron 1 of 1)	1350	NM_001164598	Irf2bp2
	chr1-917	chr1	91080046	91080196	+	13.4	0	intron (NM_008515, intron 6 of 22)	26677	NM_008515	Lrrfip1
	chr4-235	chr4	81023559	81023709	+	13.4	0	Intergenic	112948	NM_026821	Lurap1l
	chr2-956	chr2	113263195	113263345	+	13.4	0	MTC|LTR|ERVL-MaLR	-22462	NM_029232	Tmco5b
	chr13-478	chr13	41817412	41817562	+	13.4	0	intron (NM_175417, intron 2 of 6)	30001	NM_175417	Adtrp
	chr1-835	chr1	179177416	179177566	+	13.4	0	intron (NM_027188, intron 5 of 11)	340512	NM_027188	Smyd3
	chr1-1037	chr1	194510092	194510242	+	13.4	0	Intergenic	-109662	NM_008882	Plxna2
	chr6-584	chr6	148947137	148947287	+	13.4	0	promoter-TSS (NM_019643)	-780	NM_019643	Fam60a
	chr11-584	chr11	18944995	18945145	+	13.4	0	intron (NM_001193271, intron 7 of 12)	73899	NM_001193271	Meis1
	chr18-185	chr18	24808797	24808947	+	13.4	0	L1MB8|LINE|L1	100249	NM_001289655	Fhod3
	chr3-975	chr3	107850716	107850866	+	13.4	0	Intergenic	-26439	NM_133867	Eps8l3
	chr1-858	chr1	45605196	45605346	+	13.4	0	Intergenic	-101989	NM_007737	Col5a2
	chr10-469	chr10	76816559	76816709	+	13.4	0	intron (NM_001347216, intron 3 of 15)	-90590	NM_009933	Col6a1
	chr3-959	chr3	80901937	80902087	+	13.4	0	intron (NM_001345957, intron 2 of 10)	10106	NM_001345996	Glrb
	chr18-205	chr18	44573381	44573531	+	13.4	0	intron (NM_001085373, intron 3 of 18)	-88209	NR_026853	A930012L18Rik
	chr12-301	chr12	21225552	21225702	+	13.4	0	intron (NM_001004364, intron 12 of 26)	60610	NM_008403	Itgb1bp1
	chr5-681	chr5	105445076	105445226	+	13.4	0	intron (NM_001033550, intron 1 of 4)	29376	NM_001033550	Lrrc8b
	chr2-910	chr2	109692354	109692504	+	13.4	0	promoter-TSS (NM_001048141)	-7	NM_001048141	Bdnf
	chr2-1051	chr2	65210573	65210723	+	13.4	0	intron (NM_027225, intron 1 of 12)	27978	NM_177025	Cobll1
	chr9-454	chr9	20459855	20460005	+	13.4	0	CpG	230	NM_011753	Zfp26
	chr10-420	chr10	96822521	96822671	+	13.4	0	Intergenic	205595	NM_007569	Btg1
	chr16-512	chr16	44109111	44109261	+	13.4	0	intron (NM_007508, intron 6 of 14)	29833	NM_007508	Atp6v1a
	chr9-449	chr9	102645432	102645582	+	13.4	0	Intergenic	19211	NM_181394	Anapc13
	chr9-439	chr9	59687470	59687620	+	13.4	0	Intergenic	-20219	NM_001033498	Gramd2
	chr17-493	chr17	21728239	21728389	+	13.4	0	Intergenic	-5410	NM_001164676	Zfp229
	chr15-564	chr15	6971659	6971809	+	13.4	0	Intergenic	-97421	NM_001310469	Osmr
	chr1-863	chr1	78330741	78330891	+	13.4	0	intron (NM_001004173, intron 1 of 4)	20470	NM_001004173	Sgpp2
	chr11-583	chr11	13975721	13975871	+	13.4	0	Intergenic	203245	NR_131011	4930554G24Rik
	chr11-604	chr11	88457489	88457639	+	13.4	0	intron (NM_054043, intron 7 of 13)	104791	NR_039545	Mir378b
	chr16-529	chr16	24296929	24297079	+	13.4	0	Intergenic	-96346	NM_178665	Lpp
	chr6-757	chr6	67532739	67532889	+	13.4	0	Intergenic	3008	NM_020047	Tacstd2
	chr1-903	chr1	30838849	30838999	+	13.4	0	RSINE1|SINE|B4	24332	NM_001081080	Phf3
	chr17-535	chr17	65905391	65905541	+	13.4	0	Intergenic	-19711	NM_009067	Ralbp1
	chr17-545	chr17	93484676	93484826	+	13.4	0	Intergenic	285583	NM_009625	Adcyap1
	chr1-846	chr1	192604341	192604491	+	13.4	0	intron (NM_144881, intron 9 of 11)	166803	NM_144881	Hhat
	chr9-424	chr9	9124348	9124498	+	13.4	0	intron (NM_027823, intron 3 of 22)	-111865	NR_045754	Gm16833
	chr11-562	chr11	54852480	54852630	+	13.4	0	intron (NM_029327, intron 2 of 4)	8036	NM_029327	Lyrm7
	chr10-383	chr10	38136102	38136252	+	13.4	0	Intergenic	-39597	NR_131035	4930591E09Rik
	chr11-500	chr11	90046431	90046581	+	13.4	0	Intergenic	16158	NM_026433	Tmem100
	chr17-534	chr17	65719860	65720010	+	13.4	0	intron (NM_133685, intron 2 of 6)	52817	NM_133685	Rab31
	chr2-945	chr2	50273538	50273688	+	13.4	0	Intergenic	23064	NM_133839	Mmadhc
	chr6-692	chr6	121026137	121026287	+	13.4	0	intron (NR_138097, intron 12 of 18)	-38252	NR_138098	Gm4651
	chr12-296	chr12	117729588	117729738	+	13.4	0	intron (NM_175930, intron 21 of 27)	-114198	NM_146040	Cdca7l
	chr13-577	chr13	24841751	24841901	+	13.4	0	3' UTR (NM_019551, exon 7 of 7)	-3305	NM_001081051	D130043K22Rik
	chr18-202	chr18	14961179	14961329	+	13.4	0	Intergenic	-27741	NR_045372	4933424G05Rik
	chr17-474	chr17	21706521	21706671	+	13.4	0	MMSAT4|Satellite|Satellite	-1145	NM_001008501	Zfp760
	chr18-175	chr18	25844676	25844826	+	13.4	0	MLT1H2|LTR|ERVL-MaLR	-90768	NM_001174074	Celf4
	chr8-686	chr8	61624182	61624332	+	13.4	0	MIR|SINE|MIR	-33088	NM_001293774	Palld
	chr15-558	chr15	84224885	84225035	+	13.4	0	Intergenic	-7083	NM_133167	Parvb
	chr14-330	chr14	120355590	120355740	+	13.4	0	intron (NM_175341, intron 2 of 8)	79996	NM_175341	Mbnl2
	chr3-931	chr3	104298956	104299106	+	13.4	0	L1MA4|LINE|L1	-78625	NM_001159354	Magi3
	chr5-572	chr5	24952479	24952629	+	13.4	0	intron (NM_145401, intron 3 of 15)	43199	NM_001310480	Prkag2
	chr2-1042	chr2	29802524	29802674	+	13.4	0	promoter-TSS (NM_011989)	-81	NM_011989	Slc27a4
	chr4-289	chr4	98699219	98699369	+	13.4	0	intron (NM_172696, intron 42 of 43)	-27460	NM_001081202	L1td1
	chr11-556	chr11	47149713	47149863	+	13.4	0	intron (NM_011891, intron 3 of 7)	229514	NM_011891	Sgcd
	chr19-384	chr19	57055974	57056124	+	13.4	0	B2_Mm2|SINE|B2	-47474	NM_001177797	Afap1l2
	chr8-722	chr8	67494718	67494868	+	13.4	0	promoter-TSS (NM_010874)	-82	NM_001168577	Nat2
	chr5-549	chr5	64056462	64056612	+	13.4	0	ORR1D1|LTR|ERVL-MaLR	11564	NR_045384	5830416I19Rik
	chr1-897	chr1	14003985	14004135	+	13.4	0	MLT1A0|LTR|ERVL-MaLR	-217131	NR_004447	Gm5523
	chr1-853	chr1	34202722	34202872	+	13.4	0	intron (NM_001276764, intron 48 of 102)	42467	NM_010081	Dst
	chr17-511	chr17	72842016	72842166	+	13.4	0	intron (NM_027166, intron 1 of 2)	5387	NM_027166	Ypel5
	chr1-869	chr1	125996782	125996932	+	13.4	0	intron (NM_001081756, intron 14 of 16)	-83929	NM_001311089	Lypd1
	chr14-282	chr14	20892048	20892198	+	13.4	0	Intergenic	-37310	NM_009502	Vcl
	chr1-817	chr1	67482109	67482259	+	13.4	0	Lx9|LINE|L1	359157	NM_001080809	Cps1
	chr8-692	chr8	77509173	77509323	+	13.4	0	intron (NM_030113, intron 1 of 22)	-7808	NR_028125	0610038B21Rik
	chr16-469	chr16	26400650	26400800	+	13.4	0	Intergenic	-28886	NM_016674	Cldn1
	chr2-991	chr2	44394790	44394940	+	13.4	0	3' UTR (NM_001301831, exon 15 of 15)	-329541	NR_040622	Arhgap15os
	chr9-430	chr9	30564629	30564779	+	13.4	0	L1MD2|LINE|L1	137375	NM_028874	Snx19
	chr2-885	chr2	166206789	166206939	+	13.4	0	Intergenic	-51181	NM_028072	Sulf2
	chr19-411	chr19	33983216	33983366	+	13.4	0	RLTR17D_Mm|LTR|ERVK	22043	NM_026334	Lipf
	chr15-481	chr15	44222063	44222213	+	13.4	0	intron (NM_013696, intron 2 of 3)	26003	NM_013696	Trhr
	chr1-864	chr1	82185142	82185292	+	13.4	0	Intergenic	53301	NR_105762	Mir6344
	chr1-789	chr1	153560444	153560594	+	13.4	0	Intergenic	-10805	NM_028749	Npl
	chr3-992	chr3	141921287	141921437	+	13.4	0	intron (NM_001277220, intron 1 of 11)	10226	NM_001277218	Bmpr1b
	chr9-383	chr9	30549993	30550143	+	13.4	0	MIRc|SINE|MIR	122739	NM_028874	Snx19
	chr19-391	chr19	38930798	38930948	+	13.4	0	promoter-TSS (NM_008234)	-117	NM_008234	Hells
	chr17-451	chr17	28571259	28571409	+	13.4	0	RLTR13D5|LTR|ERVK	-4385	NM_026571	Lhfpl5
	chr4-315	chr4	80919256	80919406	+	13.4	0	intron (NM_026821, intron 1 of 1)	8645	NM_026821	Lurap1l
	chr8-697	chr8	90669563	90669713	+	13.4	0	Intergenic	-159197	NM_177224	Chd9
	chr6-835	chr6	58893733	58893883	+	13.4	0	intron (NM_028705, intron 20 of 24)	13318	NM_021432	Nap1l5
	chr7-478	chr7	16254365	16254515	+	13.4	0	intron (NM_007577, intron 2 of 2)	4898	NM_001173550	C5ar1
	chr6-708	chr6	18721128	18721278	+	13.4	0	Intergenic	-127432	NM_133939	Lsm8
	chr1-963	chr1	86859571	86859721	+	13.4	0	intron (NM_153530, intron 8 of 20)	155842	NM_001172157	Dis3l2
	chr1-867	chr1	88537751	88537901	+	13.4	0	Intergenic	-13691	NR_037971	Gm19589
	chr1-941	chr1	179198273	179198423	+	13.4	0	intron (NM_027188, intron 5 of 11)	319655	NM_027188	Smyd3
	chr14-357	chr14	44503403	44503553	+	13.4	0	intron (NM_198677, intron 3 of 4)	3356	NM_198677	BC061237
	chr16-465	chr16	15084251	15084401	+	13.4	0	Intergenic	177680	NM_025769	Efcab1
	chr3-962	chr3	90531861	90532011	+	13.4	0	Intergenic	5087	NM_001163526	S100a14
	chr2-904	chr2	75660539	75660689	+	13.4	0	intron (NM_146130, intron 1 of 10)	1324	NR_033513	Gm6793
	chr2-1043	chr2	33406441	33406591	+	13.4	0	3' UTR (NM_001085507, exon 3 of 3)	24808	NM_001085507	Zbtb34
	chr6-741	chr6	139938611	139938761	+	13.4	0	MARNA|DNA|TcMar-Mariner	97241	NM_011084	Pik3c2g
	chr15-496	chr15	96492415	96492565	+	13.4	0	Intergenic	-31647	NM_028148	Scaf11
	chr14-279	chr14	88337347	88337497	+	13.4	0	Intergenic	133974	NM_178685	Pcdh20
	chr9-421	chr9	116833371	116833521	+	13.4	0	MIRb|SINE|MIR	419037	NM_001172123	Rbms3
	chr19-383	chr19	55120667	55120817	+	13.4	0	Intergenic	-21295	NM_008149	Gpam
	chr17-504	chr17	45322944	45323094	+	13.4	0	Intergenic	110688	NM_152810	Cdc5l
	chr4-257	chr4	47036911	47037061	+	13	0	intron (NM_001024136, intron 8 of 14)	20320	NM_001024136	Anks6
	chrX-85	chrX	105800604	105800754	+	13	0	intron (NM_009530, intron 34 of 34)	36202	NM_030614	Fgf16
	chr11-547	chr11	12558296	12558446	+	13	0	Intergenic	-93411	NM_001282993	Cobl
	chr17-463	chr17	73068638	73068788	+	13	0	Intergenic	-39272	NM_001177968	Lclat1
	chr3-967	chr3	98238314	98238464	+	13	0	Intergenic	16233	NM_026328	Reg4
	chr18-239	chr18	44662231	44662381	+	13	0	promoter-TSS (NM_001085374)	-40	NM_001085374	Mcc
	chr8-718	chr8	27043451	27043601	+	13	0	intron (NM_001039077, intron 1 of 4)	971	NM_054057	Prosc
	chr3-946	chr3	9004443	9004593	+	13	0	promoter-TSS (NM_009412)	-3	NM_001025264	Tpd52
	chr4-232	chr4	33581990	33582140	+	13	0	Intergenic	143984	NR_106198	Mir8118
	chr17-572	chr17	74022100	74022250	+	13	0	intron (NM_053188, intron 3 of 4)	25741	NM_053188	Srd5a2
	chr17-483	chr17	40862516	40862666	+	13	0	RLTR13D5|LTR|ERVK	17967	NM_027834	9130008F23Rik
	chr19-403	chr19	10137526	10137676	+	13	0	Intergenic	-36098	NM_019699	Fads2
	chr1-951	chr1	45576640	45576790	+	13	0	Intergenic	-73433	NM_007737	Col5a2
	chr19-302	chr19	7068511	7068661	+	13	0	intron (NM_134147, intron 3 of 10)	11818	NM_134147	Macrod1
	chr6-729	chr6	119634403	119634553	+	13	0	intron (NR_104484, intron 16 of 20)	-90131	NM_009525	Wnt5b
	chr19-396	chr19	56320601	56320751	+	13	0	3' UTR (NM_001329935, exon 13 of 13)	32764	NM_146101	Habp2
	chr10-429	chr10	40906944	40907094	+	13	0	L1M5|LINE|L1	23485	NM_031877	Wasf1
	chr3-1085	chr3	123605837	123605987	+	13	0	intron (NR_121616, intron 5 of 13)	13538	NM_001293682	Ndst3
	chr14-303	chr14	34952525	34952675	+	13	0	intron (NM_008166, intron 3 of 15)	57991	NR_029774	Mir346
	chr12-287	chr12	74144611	74144761	+	13	0	intron (NM_172804, intron 2 of 6)	-139590	NR_030734	1700086L19Rik
	chr1-1077	chr1	193434606	193434756	+	13	0	Intergenic	-64399	NM_144817	Camk1g
	chr18-238	chr18	43421797	43421947	+	13	0	MER126|DNA|DNA	16414	NM_001291455	Dpysl3
	chr15-486	chr15	73233059	73233209	+	13	0	B4|SINE|B4	21748	NR_029561	Mir151
	chr3-1049	chr3	40694236	40694386	+	13	0	intron (NM_175515, intron 13 of 15)	-14560	NM_178386	Slc25a31
	chr11-578	chr11	3332358	3332508	+	13	0	CpG-1656	1702	NM_178149	Pik3ip1
	chr4-325	chr4	144940070	144940220	+	13	0	MTD|LTR|ERVL-MaLR	47008	NM_011303	Dhrs3
	chr10-436	chr10	66780151	66780301	+	13	0	Intergenic	140158	NR_138560	1110002J07Rik
	chr6-560	chr6	125157937	125158087	+	13	0	URR1A|DNA|hAT-Charlie	7761	NM_008084	Gapdh
	chr3-951	chr3	37734000	37734150	+	13	0	RMER5|LTR|ERV1	-9715	NM_198657	Gm5148
	chr8-768	chr8	23724787	23724937	+	13	0	intron (NM_001277239, intron 1 of 7)	55201	NM_177086	Zmat4
	chr10-422	chr10	110642378	110642528	+	13	0	Intergenic	41803	NR_028438	9230102K24Rik
	chr10-361	chr10	40417036	40417186	+	13	0	intron (NM_198164, intron 2 of 11)	67803	NM_001291816	Cdk19
	chr1-926	chr1	128714282	128714432	+	13	0	Intergenic	-122058	NM_009911	Cxcr4
	chr17-529	chr17	43327245	43327395	+	13	0	Intergenic	56973	NM_133776	Adgrf1
	chr7-571	chr7	114779605	114779755	+	13	0	MIR|SINE|MIR	33914	NM_173767	Insc
	chr1-946	chr1	189922288	189922438	+	13	0	promoter-TSS (NM_026796)	-75	NM_026796	Smyd2
	chr4-341	chr4	91263891	91264041	+	13	0	intron (NM_001347149, intron 5 of 7)	108089	NM_010486	Elavl2
	chr13-558	chr13	63126737	63126887	+	13	0	intron (NM_001289926, intron 5 of 15)	-113217	NR_110520	2010111I01Rik
	chr12-349	chr12	88446009	88446159	+	13	0	ORR1E|LTR|ERVL-MaLR	-68761	NR_045888	3200001D21Rik
	chr2-1103	chr2	113639642	113639792	+	13	0	L2c|LINE|L2	-45373	NM_001287818	Fmn1
	chr9-368	chr9	76421147	76421297	+	13	0	Intergenic	-97644	NM_198962	Hcrtr2
	chr16-530	chr16	26081603	26081753	+	13	0	intron (NM_173379, intron 1 of 14)	24106	NM_173379	P3h2
	chr8-761	chr8	110817607	110817757	+	13	0	exon (NM_133953, exon 18 of 26)	-11758	NM_001135100	Il34
	chr15-573	chr15	40259561	40259711	+	13	0	Intergenic	125271	NM_001256056	9330182O14Rik
	chr2-1111	chr2	138826809	138826959	+	13	0	Intergenic	6955	NR_035477	Mir1952
	chr1-930	chr1	151171666	151171816	+	13	0	Intergenic	33707	NR_038011	C730036E19Rik
	chr12-328	chr12	70225353	70225503	+	13	0	intron (NM_133198, intron 1 of 19)	2255	NM_133198	Pygl
	chr3-1026	chr3	122202633	122202783	+	13	0	Intergenic	-42849	NM_008129	Gclm
	chr1-980	chr1	170706358	170706508	+	13	0	3' UTR (NM_001081304, exon 16 of 16)	61901	NM_177068	Olfml2b
	chr7-484	chr7	44670922	44671072	+	13	0	promoter-TSS (NM_001271540)	-154	NM_001271540	Myh14
	chr13-507	chr13	71270642	71270792	+	13	0	Intergenic	163628	NR_130325	Mir466f-4
	chr13-572	chr13	15429298	15429448	+	13	0	RLTR26B_MM|LTR|ERVK	-34350	NM_008130	Gli3
	chr6-668	chr6	17528799	17528949	+	13	0	intron (NM_008591, intron 6 of 21)	64917	NM_008591	Met
	chr13-545	chr13	17803527	17803677	+	13	0	exon (NM_001081058, exon 1 of 14)	1495	NM_001081058	Cdk13
	chr5-673	chr5	64382644	64382794	+	13	0	Intergenic	85223	NR_040681	1700027F09Rik
	chr3-964	chr3	92205526	92205676	+	13	0	Intergenic	-10234	NM_001164787	Sprr2a2
	chr2-1112	chr2	140861457	140861607	+	13	0	intron (NM_001013802, intron 4 of 18)	-190056	NM_178382	Flrt3
	chr5-633	chr5	3529953	3530103	+	13	0	3' UTR (NM_009873, exon 8 of 8)	-13805	NM_001042501	Fam133b
	chr5-554	chr5	93020269	93020419	+	13	0	Intergenic	24678	NM_175270	Sowahb
	chr1-971	chr1	133482957	133483107	+	13	0	Intergenic	-58820	NM_011439	Sox13
	chr18-230	chr18	90553890	90554040	+	13	0	RLTR45-int|LTR|ERVK	43811	NM_198295	Tmx3
	chr5-605	chr5	48784238	48784388	+	13	0	intron (NM_001199244, intron 1 of 7)	105244	NM_030265	Kcnip4
	chr9-480	chr9	115583665	115583815	+	13	0	MTEa|LTR|ERVL-MaLR	201921	NR_130329	Mir467h
	chr17-488	chr17	5846361	5846511	+	13	0	Lx9|LINE|L1	5056	NM_025664	Snx9
	chr13-529	chr13	56381300	56381450	+	13	0	Intergenic	18475	NR_046061	Gm10782
	chr13-518	chr13	24751600	24751750	+	13	0	TTS (NM_020567)	10262	NM_020567	Gmnn
	chr13-506	chr13	70836235	70836385	+	13	0	non-coding (NR_137640, exon 3 of 23)	5501	NM_172053	Adamts16
	chr3-1080	chr3	116126304	116126454	+	13	0	intron (NM_011693, intron 2 of 8)	3309	NM_011693	Vcam1
	chr3-1143	chr3	153585059	153585209	+	13	0	intron (NM_011372, intron 1 of 4)	139999	NM_011372	St6galnac3
	chr1-866	chr1	83455252	83455402	+	13	0	Intergenic	-47127	NM_172430	Sphkap
	chr6-713	chr6	34567467	34567617	+	13	0	Intergenic	-30962	NM_001347100	Cald1
	chr13-593	chr13	107959988	107960138	+	13	0	Intergenic	-69999	NM_145456	Zswim6
	chr12-289	chr12	86889134	86889284	+	13	0	Intergenic	-4395	NM_145836	Irf2bpl
	chr1-910	chr1	59464927	59465077	+	13	0	Intergenic	-17145	NM_008057	Fzd7
	chr1-922	chr1	97873754	97873904	+	13	0	Lx8|LINE|L1	103657	NM_026250	Gin1
	chr5-623	chr5	131435690	131435840	+	13	0	Intergenic	-128243	NM_145218	Wbscr17
	chr15-471	chr15	6391535	6391685	+	13	0	intron (NM_001310446, intron 1 of 13)	4862	NM_001310446	Dab2
	chr2-893	chr2	14446852	14447002	+	13	0	intron (NM_001012305, intron 10 of 12)	58529	NM_001012305	Slc39a12
	chr6-764	chr6	101102396	101102546	+	13	0	Intergenic	268833	NM_182939	Ppp4r2
	chrX-88	chrX	40007396	40007546	+	13	0	Intergenic	-143867	NM_001191032	Cypt14
	chr3-1091	chr3	145348787	145348937	+	13	0	intron (NM_001317733, intron 12 of 59)	56390	NM_001317733	Col24a1
	chr16-569	chr16	57062155	57062305	+	13	0	intron (NM_183281, intron 2 of 6)	9116	NM_183281	Tmem45a2
	chr8-777	chr8	49493149	49493299	+	13	0	Intergenic	-818534	NM_011857	Tenm3
	chr8-755	chr8	91653527	91653677	+	13	0	intron (NM_011936, intron 8 of 8)	148052	NM_001253822	Irx3
	chr6-710	chr6	28344234	28344384	+	13	0	B4A|SINE|B4	77415	NM_028900	Gcc1
	chr3-1066	chr3	84974572	84974722	+	13	0	intron (NM_001177773, intron 12 of 13)	22436	NM_080428	Fbxw7
	chr8-676	chr8	11259930	11260080	+	13	0	intron (NR_133670, intron 2 of 52)	-52800	NM_009932	Col4a2
	chr9-447	chr9	96770540	96770690	+	13	0	intron (NR_102295, intron 2 of 2)	5053	NR_102296	C430002N11Rik
	chr1-852	chr1	33733127	33733277	+	13	0	Lx8|LINE|L1	12783	NM_001159729	Rab23
	chr14-310	chr14	12099830	12099980	+	13	0	intron (NM_008981, intron 6 of 29)	-90038	NM_001347593	Ptprg
	chr2-1110	chr2	137509440	137509590	+	12.6	0	Intergenic	-392995	NM_013822	Jag1
	chr6-800	chr6	100909479	100909629	+	12.6	0	Intergenic	75916	NM_182939	Ppp4r2
	chr7-493	chr7	109620993	109621143	+	12.6	0	MER21B|LTR|ERVL	-3921	NM_029811	St5
	chr16-524	chr16	13195195	13195345	+	12.6	0	Intergenic	-61211	NM_001122667	Mkl2
	chr7-598	chr7	92464494	92464644	+	12.6	0	MTC|LTR|ERVL-MaLR	-96580	NM_025515	Ccdc90b
	chr8-853	chr8	110316157	110316307	+	12.6	0	intron (NM_172916, intron 6 of 86)	49255	NM_172916	Hydin
	chr3-1086	chr3	128181274	128181424	+	12.6	0	intron (NR_045704, intron 2 of 5)	50256	NR_045704	D030025E07Rik
	chr16-523	chr16	13014006	13014156	+	12.6	0	Intergenic	-95655	NM_015769	Ercc4
	chr7-604	chr7	117571823	117571973	+	12.6	0	intron (NM_175645, intron 3 of 11)	190919	NM_175645	Xylt1
	chr9-515	chr9	33681074	33681224	+	12.6	0	Intergenic	-361222	NR_040744	7630403G23Rik
	chr14-333	chr14	11823042	11823192	+	12.6	0	intron (NM_008981, intron 2 of 29)	269564	NM_008981	Ptprg
	chr2-1116	chr2	148582415	148582565	+	12.6	0	Intergenic	-90125	NM_019761	Nxt1
	chr17-517	chr17	86414694	86414844	+	12.6	0	intron (NM_011104, intron 2 of 14)	-127591	NR_045435	2010106C02Rik
	chr1-1009	chr1	79898311	79898461	+	12.6	0	Intergenic	-39721	NM_009255	Serpine2
	chr2-1182	chr2	174419018	174419168	+	12.6	0	intron (NM_020580, intron 1 of 14)	3289	NM_020580	Nelfcd
	chr4-302	chr4	8744899	8745049	+	12.6	0	intron (NM_001277149, intron 1 of 37)	54568	NM_001277149	Chd7
	chr7-588	chr7	65011337	65011487	+	12.6	0	intron (NM_183087, intron 1 of 9)	-138372	NM_023239	Ndnl2
	chr3-1028	chr3	136866122	136866272	+	12.6	0	intron (NM_008913, intron 2 of 13)	196131	NM_001293622	Ppp3ca
	chr2-1122	chr2	160859623	160859773	+	12.6	0	intron (NM_177263, intron 1 of 3)	13292	NM_177263	Zhx3
	chr17-552	chr17	13760158	13760308	+	12.6	0	promoter-TSS (NM_010806)	-308	NM_010806	Afdn
	chr8-700	chr8	103781211	103781361	+	12.6	0	MLT1C|LTR|ERVL-MaLR	177487	NR_045730	4933400L20Rik
	chr1-908	chr1	52133343	52133493	+	12.6	0	intron (NM_001205313, intron 6 of 24)	13796	NM_001205313	Stat1
	chr2-1089	chr2	47927535	47927685	+	12.6	0	Intergenic	-886499	NM_007396	Acvr2a
	chr10-407	chr10	20347681	20347831	+	12.6	0	promoter-TSS (NM_027930)	-63	NM_027930	Mtfr2
	chr13-580	chr13	38815118	38815268	+	12.6	0	Intergenic	145344	NM_001170430	Slc35b3
	chr13-599	chr13	114655022	114655172	+	12.6	0	intron (NR_045976, intron 3 of 6)	47869	NR_045976	4930544M13Rik
	chr5-649	chr5	104428555	104428705	+	12.6	0	Intergenic	-6481	NM_001204201	Spp1
	chr4-245	chr4	130876022	130876172	+	12.6	0	Intergenic	-37237	NM_010686	Laptm5
	chr6-761	chr6	97566802	97566952	+	12.6	0	intron (NM_145148, intron 1 of 23)	50780	NM_145148	Frmd4b
	chr10-441	chr10	83152462	83152612	+	12.6	0	intron (NM_021439, intron 2 of 2)	167040	NM_021439	Chst11
	chr1-982	chr1	172213583	172213733	+	12.6	0	intron (NM_009813, intron 7 of 10)	6237	NM_009813	Casq1
	chr17-500	chr17	31512194	31512344	+	12.6	0	exon (NM_021322, exon 1 of 11)	218	NM_021322	Wdr4
	chr7-594	chr7	82688889	82689039	+	12.6	0	intron (NM_175317, intron 12 of 19)	40350	NM_175317	Efl1
	chr8-809	chr8	80976149	80976299	+	12.6	0	Intergenic	38682	NM_027554	Usp38
	chr11-651	chr11	22848211	22848361	+	12.6	0	intron (NM_001169114, intron 1 of 1)	11449	NM_016888	B3gnt2
	chr3-1181	chr3	105806840	105806990	+	12.6	0	Charlie10|DNA|hAT-Charlie	-5534	NM_145541	Rap1a
	chr2-1117	chr2	151749519	151749669	+	12.6	0	L2|LINE|L2	1871	NR_138568	4930556L07Rik
	chr4-365	chr4	97207240	97207390	+	12.6	0	Intergenic	-374628	NM_001122952	Nfia
	chr10-476	chr10	96394914	96395064	+	12.6	0	Intergenic	168782	NR_110448	4930459C07Rik
	chr5-590	chr5	134989879	134990029	+	12.6	0	non-coding (NR_026907, exon 4 of 5)	3740	NM_009902	Cldn3
	chr18-215	chr18	6952800	6952950	+	12.6	0	intron (NM_177595, intron 5 of 6)	51904	NM_177595	Mkx
	chr3-1090	chr3	144539135	144539285	+	12.6	0	intron (NM_011828, intron 1 of 6)	31006	NM_011828	Hs2st1
	chr17-513	chr17	78246771	78246921	+	12.6	0	intron (NM_015800, intron 2 of 16)	46598	NM_015800	Crim1
	chr4-340	chr4	88550310	88550460	+	12.6	0	Intergenic	7860	NM_206870	Ifna15
	chr3-965	chr3	92373717	92373867	+	12.6	0	promoter-TSS (NR_003548)	-123	NR_003548	Sprr2g
	chr17-590	chr17	28698353	28698503	+	12.6	0	intron (NM_001168514, intron 2 of 12)	5860	NM_001168513	Mapk14
	chr6-860	chr6	134568894	134569044	+	12.6	0	Intergenic	-2056	NM_008514	Lrp6
	chr11-649	chr11	16992286	16992436	+	12.6	0	intron (NM_019549, intron 4 of 9)	16357	NM_019549	Plek
	chr1-1052	chr1	75697170	75697320	+	12.6	0	Intergenic	150979	NM_009208	Slc4a3
	chr15-536	chr15	27904431	27904581	+	12.6	0	intron (NM_001081302, intron 4 of 56)	121342	NM_001081302	Trio
	chr3-1130	chr3	117073145	117073295	+	12.6	0	intron (NR_038029, intron 2 of 8)	4545	NR_038029	1700061I17Rik
	chr6-754	chr6	52443482	52443632	+	12.6	0	Intergenic	-48894	NR_046049	1700094M24Rik
	chr14-302	chr14	34549498	34549648	+	12.6	0	CpG	-26772	NM_030062	9230112D13Rik
	chr10-433	chr10	56783436	56783586	+	12.6	0	Intergenic	406211	NM_010288	Gja1
	chr8-905	chr8	128346305	128346455	+	12.6	0	MER54A|LTR|ERVL	-12693	NM_008737	Nrp1
	chr13-551	chr13	46727949	46728099	+	12.6	0	promoter-TSS (NM_175749)	-175	NM_175749	Nup153
	chr10-357	chr10	96822934	96823084	+	12.6	0	L1MB5|LINE|L1	206008	NM_007569	Btg1
	chr6-742	chr6	139951603	139951753	+	12.6	0	intron (NM_011084, intron 14 of 15)	89739	NM_054066	Plcz1
	chr8-784	chr8	83619628	83619778	+	12.6	0	Intergenic	11155	NM_001308227	Dnajb1
	chr6-704	chr6	149185968	149186118	+	12.6	0	intron (NM_001113424, intron 1 of 6)	2669	NM_001113424	Amn1
	chr1-998	chr1	39259843	39259993	+	12.6	0	intron (NM_008719, intron 1 of 20)	65646	NM_008719	Npas2
	chr8-721	chr8	64639793	64639943	+	12.6	0	intron (NM_013494, intron 1 of 8)	53241	NM_013494	Cpe
	chr19-367	chr19	47432464	47432614	+	12.6	0	intron (NM_001164717, intron 1 of 13)	31872	NM_001164717	Sh3pxd2a
	chr1-913	chr1	78705018	78705168	+	12.6	0	intron (NM_028817, intron 14 of 15)	46653	NM_001136226	Utp14b
	chr13-552	chr13	48447868	48448018	+	12.6	0	Intergenic	65467	NM_001164575	Zfp169
	chr10-467	chr10	53524532	53524682	+	12.6	0	MLT1A1|LTR|ERVL-MaLR	-5618	NR_037973	Gm20597
	chr9-549	chr9	59750803	59750953	+	12.6	0	promoter-TSS (NM_001172071)	-229	NM_001172070	Senp8
	chr5-663	chr5	23410068	23410218	+	12.6	0	Intergenic	24210	NR_040469	5031425E22Rik
	chr19-445	chr19	55548748	55548898	+	12.6	0	intron (NM_001293686, intron 7 of 7)	153381	NR_045318	4930552P12Rik
	chr4-367	chr4	101159674	101159824	+	12.6	0	intron (NM_146145, intron 17 of 24)	90711	NM_183024	Raver2
	chr6-647	chr6	72068548	72068698	+	12.6	0	RMER15|LTR|ERVL	-26095	NR_046180	9130221F21Rik
	chr4-331	chr4	33795539	33795689	+	12.6	0	Intergenic	-129018	NM_007726	Cnr1
	chr7-565	chr7	90233983	90234133	+	12.6	0	intron (NM_183293, intron 7 of 10)	31374	NM_029256	Ccdc83
	chr17-519	chr17	5679423	5679573	+	12.6	0	intron (NM_146073, intron 2 of 8)	-119159	NR_045081	3300005D01Rik
	chr12-353	chr12	102600508	102600658	+	12.6	0	intron (NM_172584, intron 4 of 9)	45642	NM_007693	Chga
	chr1-902	chr1	24286481	24286631	+	12.6	0	intron (NM_007733, intron 44 of 50)	91353	NM_001290691	Col9a1
	chr5-601	chr5	38298840	38298990	+	12.6	0	MIR|SINE|MIR	-20594	NM_013503	Drd5
	chr3-949	chr3	27616953	27617103	+	12.6	0	intron (NM_173182, intron 3 of 25)	-32033	NR_037275	Mir3092
	chr5-790	chr5	101905750	101905900	+	12.6	0	intron (NM_172882, intron 30 of 66)	140695	NM_173370	Cds1
	chr4-251	chr4	8857617	8857767	+	12.6	0	intron (NM_001277149, intron 32 of 37)	167286	NM_001277149	Chd7
	chr7-435	chr7	95829959	95830109	+	12.6	0	Intergenic	-341210	NM_001310762	Tenm4
	chr6-747	chr6	7692657	7692807	+	12.6	0	intron (NM_012055, intron 1 of 11)	450	NM_012055	Asns
	chr15-519	chr15	84214276	84214426	+	12.6	0	TTS (NM_178614)	-17692	NM_133167	Parvb
	chr8-774	chr8	40895452	40895602	+	12.6	0	intron (NM_007514, intron 1 of 11)	-30706	NM_026840	Pdgfrl
	chr5-602	chr5	38385280	38385430	+	12.6	0	intron (NM_001012363, intron 8 of 11)	40966	NR_046191	4930487D11Rik
	chr13-499	chr13	58215929	58216079	+	12.6	0	promoter-TSS (NM_152234)	-351	NM_026842	Ubqln1
	chr9-484	chr9	25042922	25043072	+	12.6	0	Intergenic	108784	NM_020586	Herpud2
	chr10-477	chr10	98744325	98744475	+	12.6	0	Intergenic	-170752	NM_026482	Atp2b1
	chr7-585	chr7	58931629	58931779	+	12.6	0	Lx5c|LINE|L1	273502	NM_009728	Atp10a
	chr2-1059	chr2	112733131	112733281	+	12.6	0	intron (NM_177652, intron 61 of 103)	173524	NM_001165935	Aven
	chr19-446	chr19	56419595	56419745	+	12.6	0	intron (NM_007611, intron 2 of 6)	22541	NM_007611	Casp7
	chr1-919	chr1	94138442	94138592	+	12.6	0	MLT1F2|LTR|ERVL-MaLR	-85964	NM_008798	Pdcd1
	chr19-432	chr19	14437373	14437523	+	12.6	0	Intergenic	1058	NR_003027	Rnu6
	chr2-1094	chr2	58787200	58787350	+	12.6	0	intron (NM_001289660, intron 7 of 7)	32091	NM_029692	Upp2
	chr1-932	chr1	152553782	152553932	+	12.6	0	intron (NM_001346119, intron 6 of 17)	71360	NM_016846	Rgl1
	chr16-503	chr16	92788609	92788759	+	12.6	0	intron (NM_001111022, intron 2 of 6)	37390	NM_001111021	Runx1
	chr1-940	chr1	178778179	178778329	+	12.6	0	intron (NM_001161665, intron 4 of 14)	249129	NM_001161665	Kif26b
	chr3-1014	chr3	84731150	84731300	+	12.6	0	Intergenic	65033	NM_177260	Tmem154
	chr8-705	chr8	111056215	111056365	+	12.6	0	promoter-TSS (NM_028274)	-49	NM_028274	Exosc6
	chr2-1068	chr2	145600547	145600697	+	12.6	0	L1MC5|LINE|L1	-45640	NM_001037929	Gm14092
	chr17-490	chr17	15988254	15988404	+	12.6	0	Intergenic	-161743	NM_178615	Rgmb
	chr17-491	chr17	17408354	17408504	+	12.6	0	intron (NM_025681, intron 1 of 5)	5743	NM_025681	Lix1
	chr6-878	chr6	47788356	47788506	+	12.6	0	Intergenic	15221	NR_030485	Mir704
	chr15-576	chr15	50731177	50731327	+	12.6	0	intron (NM_001310481, intron 4 of 5)	157797	NM_001310481	Trps1
	chr4-307	chr4	46070144	46070294	+	12.6	0	intron (NM_021883, intron 2 of 9)	30997	NM_021883	Tmod1
	chr13-495	chr13	46534215	46534365	+	12.6	0	intron (NM_026056, intron 3 of 12)	32387	NM_026056	Cap2
	chr17-583	chr17	23726777	23726927	+	12.6	0	CpG	516	NM_023058	Pkmyt1
	chr8-819	chr8	111659925	111660075	+	12.6	0	MERVL_2A-int|LTR|ERVL	16557	NM_011742	Zfp1
	chr1-909	chr1	52251167	52251317	+	12.6	0	PB1D7|SINE|Alu	-18010	NM_001113383	Gls
	chr19-419	chr19	48700357	48700507	+	12.6	0	RMER15|LTR|ERVL	494407	NM_025696	Sorcs3
	chr3-1033	chr3	146107542	146107692	+	12.6	0	intron (NM_172864, intron 1 of 22)	419	NM_172864	Wdr63
	chr8-780	chr8	73242210	73242360	+	12.6	0	intron (NM_010687, intron 1 of 14)	111255	NM_001317391	Large1
	chr6-872	chr6	8308015	8308165	+	12.6	0	intron (NM_001302353, intron 2 of 4)	48802	NM_001302353	Umad1
	chr13-505	chr13	70116309	70116459	+	12.6	0	MTEb|LTR|ERVL-MaLR	-88036	NR_045965	1700084F23Rik
	chr15-532	chr15	25966279	25966429	+	12.6	0	intron (NM_025459, intron 3 of 7)	-18012	NM_144523	Zfp622
	chr1-870	chr1	130047623	130047773	+	12.6	0	intron (NM_172485, intron 15 of 27)	375345	NM_007827	Cd55b
	chr10-456	chr10	26797883	26798033	+	12.6	0	intron (NM_176837, intron 1 of 14)	25446	NM_176837	Arhgap18
	chr9-461	chr9	41736129	41736279	+	12.6	0	Intergenic	154278	NR_029822	Mir125b-1
	chr3-977	chr3	108721114	108721264	+	12.6	0	intron (NM_029522, intron 1 of 14)	1110	NM_029522	Gpsm2
	chr6-802	chr6	115371867	115372017	+	12.6	0	intron (NM_001308354, intron 1 of 7)	9593	NM_001308354	Pparg
	chr10-444	chr10	112248459	112248609	+	12.6	0	L3|LINE|CR1	-22589	NM_001025581	Kcnc2
	chr9-500	chr9	95959830	95959980	+	12.6	0	intron (NM_011916, intron 1 of 41)	5145	NM_001311130	Xrn1
	chr5-676	chr5	88676123	88676273	+	12.6	0	promoter-TSS (NM_178700)	-27	NM_178700	Grsf1
	chr1-985	chr1	187267815	187267965	+	12.6	0	intron (NM_026367, intron 5 of 9)	52379	NM_026367	Gpatch2
	chr9-524	chr9	61533516	61533666	+	12.2	0	Intergenic	161225	NM_001083927	Tle3
	chr5-677	chr5	90218231	90218381	+	12.2	0	intron (NR_028088, intron 4 of 5)	5690	NR_028088	Cox18
	chr14-311	chr14	14476852	14477002	+	12.2	0	RLTR13D5|LTR|ERVK	130432	NM_008369	Il3ra
	chr6-776	chr6	143786116	143786266	+	12.2	0	Intergenic	-134903	NR_045732	1700060C16Rik
	chr1-1008	chr1	79458701	79458851	+	12.2	0	Intergenic	-18686	NM_001310680	Scg2
	chr13-611	chr13	47562784	47562934	+	12.2	0	Intergenic	-347576	NR_045156	G630093K05Rik
	chr3-1101	chr3	30788516	30788666	+	12.2	0	Intergenic	-4285	NM_027016	Sec62
	chr4-386	chr4	35402523	35402673	+	12.2	0	Intergenic	-176718	NM_001081343	3110043O21Rik
	chr6-740	chr6	137135586	137135736	+	12.2	0	Eulor5A|DNA?|DNA?	34057	NM_001164214	Rerg
	chr3-919	chr3	81699848	81699998	+	12.2	0	Intergenic	-102102	NR_138586	A830029E22Rik
	chr9-517	chr9	37143459	37143609	+	12.2	0	intron (NM_148950, intron 1 of 11)	3788	NM_148950	Pknox2
	chr17-526	chr17	28756479	28756629	+	12.2	0	Intergenic	-12763	NM_011950	Mapk13
	chr8-803	chr8	61692685	61692835	+	12.2	0	intron (NM_001081390, intron 8 of 19)	67338	NM_001293773	Palld
	chr16-586	chr16	18089116	18089266	+	12.2	0	promoter-TSS (NM_011172)	-1	NM_011172	Prodh
	chr10-518	chr10	120402807	120402957	+	12.2	0	intron (NM_001347170, intron 3 of 5)	13359	NR_040626	9230105E05Rik
	chr15-622	chr15	34904295	34904445	+	12.2	0	intron (NM_019635, intron 10 of 10)	66321	NM_001271704	Kcns2
	chr2-1098	chr2	102407756	102407906	+	12.2	0	Intergenic	-6931	NM_020267	Trim44
	chr12-344	chr12	73476490	73476640	+	12.2	0	Intergenic	-67002	NR_046013	D830013O20Rik
	chr13-568	chr13	106505192	106505342	+	12.2	0	Intergenic	431648	NM_029665	Ipo11
	chr4-362	chr4	89178000	89178150	+	12.2	0	intron (NM_024433, intron 7 of 7)	40705	NM_024433	Mtap
	chr11-672	chr11	78032069	78032219	+	12.2	0	promoter-TSS (NM_183286)	-169	NM_183286	Dhrs13
	chr8-767	chr8	18727118	18727268	+	12.2	0	intron (NM_007426, intron 1 of 8)	14369	NM_007426	Angpt2
	chr2-1153	chr2	74239622	74239772	+	12.2	0	Intergenic	68020	NR_040501	4930441J16Rik
	chr2-1050	chr2	64960220	64960370	+	12.2	0	intron (NM_016719, intron 2 of 13)	62471	NM_016719	Grb14
	chr3-1192	chr3	135729703	135729853	+	12.2	0	Intergenic	-38231	NM_008689	Nfkb1
	chr3-1282	chr3	89912649	89912799	+	12.2	0	intron (NM_001310676, intron 1 of 9)	472	NM_001310676	Il6ra
	chr15-539	chr15	50248499	50248649	+	12.2	0	Intergenic	640475	NM_001310481	Trps1
	chr1-1046	chr1	40128556	40128706	+	12.2	0	Intergenic	-42780	NR_037980	Gm16894
	chr11-688	chr11	3846590	3846740	+	12.2	0	intron (NM_152818, intron 1 of 13)	17238	NM_152818	Osbp2
	chr10-454	chr10	13429338	13429488	+	12.2	0	intron (NM_001195065, intron 1 of 12)	-40443	NM_001195066	Phactr2
	chr1-992	chr1	10005037	10005187	+	12.2	0	Lx8|LINE|L1	4024	NR_110971	Ppp1r42
	chr1-874	chr1	146693033	146693183	+	12.2	0	ORR1B1|LTR|ERVL-MaLR	195421	NM_001145807	Brinp3
	chr2-1053	chr2	71878137	71878287	+	12.2	0	B3A|SINE|B2	4988	NM_172665	Pdk1
	chr2-1165	chr2	121866755	121866905	+	12.2	0	promoter-TSS (NM_199038)	-140	NM_199038	Casc4
	chr17-587	chr17	26371214	26371364	+	12.2	0	Intergenic	-43676	NM_001081656	Neurl1b
	chr3-996	chr3	153729904	153730054	+	12.2	0	MTD|LTR|ERVL-MaLR	-4846	NM_011372	St6galnac3
	chr5-679	chr5	91036745	91036895	+	12.2	0	Intergenic	9303	NM_053087	Epgn
	chr1-952	chr1	54127807	54127957	+	12.2	0	intron (NM_001001883, intron 1 of 28)	67152	NM_001001883	Hecw2
	chr2-1150	chr2	65544479	65544629	+	12.2	0	intron (NM_018732, intron 1 of 26)	22938	NM_018732	Scn3a
	chr8-685	chr8	57939606	57939756	+	12.2	0	intron (NM_175032, intron 6 of 11)	-286626	NM_144731	Galnt7
	chr2-1143	chr2	48138136	48138286	+	12.2	0	Intergenic	-675898	NM_007396	Acvr2a
	chr8-817	chr8	93575022	93575172	+	12.2	0	MER5A1|DNA|hAT-Charlie	-39390	NM_001003951	Ces5a
	chr12-338	chr12	26836803	26836953	+	12.2	0	Intergenic	278117	NR_045052	Gm20187
	chr3-1221	chr3	54756198	54756348	+	12.2	0	intron (NM_019483, intron 1 of 5)	691	NM_019483	Smad9
	chr6-832	chr6	51278803	51278953	+	12.2	0	Intergenic	-8968	NR_029719	Mir148a
	chr1-984	chr1	179561109	179561259	+	12.2	0	intron (NM_146105, intron 1 of 10)	14655	NM_146105	Cnst
	chr1-1040	chr1	16637929	16638079	+	12.2	0	Intergenic	-18666	NM_001271017	Ube2w
	chr3-1256	chr3	144545954	144546104	+	12.2	0	intron (NM_011828, intron 1 of 6)	24187	NM_011828	Hs2st1
	chr6-828	chr6	41527395	41527545	+	12.2	0	L1_Mur3|LINE|L1	5694	NM_009430	Prss2
	chr7-535	chr7	35747269	35747419	+	12.2	0	RMER5|LTR|ERV1	7110	NM_178704	Dpy19l3
	chr10-450	chr10	3839764	3839914	+	12.2	0	intron (NM_001159942, intron 2 of 16)	-32828	NM_001033253	Plekhg1
	chr15-603	chr15	52967869	52968019	+	12.2	0	Intergenic	255499	NM_027212	Med30
	chr6-789	chr6	66962628	66962778	+	12.2	0	intron (NM_001177560, intron 3 of 4)	65812	NM_001177558	Gng12
	chr4-329	chr4	21793672	21793822	+	12.2	0	intron (NM_152825, intron 5 of 17)	17477	NM_152825	Usp45
	chr12-408	chr12	64381265	64381415	+	12.2	0	RLTR13D5|LTR|ERVK	93558	NM_001163271	Fscb
	chr16-627	chr16	30739725	30739875	+	12.2	0	Intergenic	140077	NM_177632	Fam43a
	chr1-1142	chr1	182369863	182370013	+	12.2	0	Intergenic	-28332	NM_175127	Fbxo28
	chr3-1111	chr3	66365809	66365959	+	12.2	0	Intergenic	-69047	NM_145820	Veph1
	chr7-514	chr7	44997530	44997680	+	12.2	0	promoter-TSS (NM_016849)	-26	NM_029410	Bcl2l12
	chr17-567	chr17	65114759	65114909	+	12.2	0	Intergenic	-278763	NM_030031	4930583I09Rik
	chr9-546	chr9	50880623	50880773	+	12.2	0	3' UTR (NM_028614, exon 15 of 15)	23774	NM_001286553	Ppp2r1b
	chr16-545	chr16	72096048	72096198	+	12.2	0	Intergenic	138204	NR_131116	8030451O07Rik
	chr12-377	chr12	8519458	8519608	+	12.2	0	Intergenic	-19548	NM_007483	Rhob
	chr3-1050	chr3	41133137	41133287	+	12.2	0	Intergenic	-50166	NM_027558	Pgrmc2
	chr5-686	chr5	132074324	132074474	+	12.2	0	intron (NM_177047, intron 2 of 18)	194130	NR_040704	4930563F08Rik
	chr8-816	chr8	93518210	93518360	+	12.2	0	intron (NM_001003951, intron 8 of 12)	17422	NM_001003951	Ces5a
	chr14-358	chr14	44730424	44730574	+	12.2	0	Intergenic	-5512	NM_001162954	Gm8267
	chr5-728	chr5	136584626	136584776	+	12.2	0	Intergenic	-17211	NM_001291238	Cux1
	chr18-267	chr18	21184343	21184493	+	12.2	0	intron (NM_001033445, intron 2 of 5)	112074	NM_008586	Mep1b
	chr19-444	chr19	53037543	53037693	+	12.2	0	intron (NM_133216, intron 1 of 20)	1036	NM_133216	Xpnpep1
	chr17-621	chr17	61608461	61608611	+	12.2	0	Intergenic	1272781	NM_207654	Efna5
	chr17-549	chr17	8856841	8856991	+	12.2	0	intron (NM_001347321, intron 1 of 21)	6931	NM_001347321	Pde10a
	chr8-824	chr8	125461317	125461467	+	12.2	0	intron (NM_001081337, intron 8 of 20)	31318	NM_001081337	Sipa1l2
	chr1-1069	chr1	177708869	177709019	+	12.2	0	Intergenic	-20870	NM_027077	1700016C15Rik
	chr1-929	chr1	138682023	138682173	+	12.2	0	promoter-TSS (NR_040304)	-23	NR_040304	Gm5833
	chr15-567	chr15	15981906	15982056	+	12.2	0	Lx9|LINE|L1	-796120	NM_009869	Cdh9
	chr3-1113	chr3	69913111	69913261	+	12.2	0	Intergenic	-53292	NM_001286959	Sptssb
	chr4-397	chr4	129742409	129742559	+	12.2	0	promoter-TSS (NR_045036)	-181	NR_045036	Khdrbs1
	chr12-361	chr12	9334487	9334637	+	12.2	0	Intergenic	236023	NR_045488	1700022H16Rik
	chr2-1203	chr2	48380336	48380486	+	12.2	0	Intergenic	-433698	NM_007396	Acvr2a
	chr10-485	chr10	19992017	19992167	+	12.2	0	MIR|SINE|MIR	57566	NM_008580	Map3k5
	chr15-616	chr15	81056195	81056345	+	12.2	0	Lx8|LINE|L1	48777	NM_153049	Mkl1
	chr2-1187	chr2	7641051	7641201	+	12.2	0	Intergenic	-244928	NM_001110231	Celf2
	chrX-103	chrX	21497549	21497699	+	12.2	0	ERVL-B4-int|LTR|ERVL	13000	NM_007429	Agtr2
	chr19-406	chr19	17256976	17257126	+	12.2	0	Intergenic	82454	NM_001136484	Gcnt1
	chr3-1046	chr3	32303489	32303639	+	12.2	0	B4|SINE|B4	-61925	NR_027966	4930429B21Rik
	chr5-662	chr5	149772654	149772804	+	12.2	0	Intergenic	39022	NR_077242	Gm21221
	chr15-605	chr15	56858195	56858345	+	12.2	0	Intergenic	-163724	NM_008216	Has2
	chr7-601	chr7	100100116	100100266	+	12.2	0	PB1D10|SINE|Alu	21309	NM_133692	Pold3
	chr1-1017	chr1	132128312	132128462	+	12.2	0	intron (NM_008795, intron 1 of 15)	11298	NM_008795	Cdk18
	chr15-582	chr15	74276978	74277128	+	12.2	0	Intergenic	210593	NR_144499	Gm32168
	chr3-1124	chr3	97998520	97998670	+	12.2	0	Intergenic	-14943	NM_010928	Notch2
	chr6-853	chr6	117848721	117848871	+	12.2	0	ORR1E|LTR|ERVL-MaLR	7521	NM_001346650	Zfp637
	chr8-775	chr8	44817841	44817991	+	12.2	0	Intergenic	-132292	NM_001081286	Fat1
	chr18-234	chr18	16702930	16703080	+	12.2	0	URR1A|DNA|hAT-Charlie	106241	NM_007664	Cdh2
	chr12-383	chr12	55464927	55465077	+	12.2	0	intron (NR_035430, intron 1 of 3)	27645	NM_010907	Nfkbia
	chr16-608	chr16	64587002	64587152	+	12.2	0	Intergenic	-107943	NM_173861	Csnka2ip
	chr9-513	chr9	23395148	23395298	+	12.2	0	intron (NM_028472, intron 11 of 14)	172147	NM_028472	Bmper
	chr12-395	chr12	9954471	9954621	+	12.2	0	Intergenic	380104	NM_011859	Osr1
	chr6-824	chr6	34248721	34248871	+	12.2	0	MamSINE1|SINE|tRNA	68647	NR_037965	Gm6644
	chr1-986	chr1	189142735	189142885	+	12.2	0	Intergenic	-134970	NM_172650	Kctd3
	chr6-752	chr6	38956731	38956881	+	12.2	0	intron (NM_011539, intron 3 of 12)	37820	NM_011539	Tbxas1
	chr12-373	chr12	100378029	100378179	+	12.2	0	intron (NM_001033213, intron 13 of 19)	101495	NR_045741	Gm10432
	chr3-1146	chr3	9025680	9025830	+	12.2	0	Intergenic	-21240	NM_001025264	Tpd52
	chr10-460	chr10	39417635	39417785	+	12.2	0	intron (NM_001122892, intron 2 of 12)	47911	NM_001122893	Fyn
	chr11-633	chr11	72342749	72342899	+	12.2	0	Intergenic	18472	NM_001282007	Tekt1
	chr10-492	chr10	35586315	35586465	+	12.2	0	Intergenic	-920417	NM_001253355	Hs3st5
	chr13-588	chr13	77271331	77271481	+	12.2	0	intron (NM_001145676, intron 11 of 19)	135870	NM_001145676	2210408I21Rik
	chr10-538	chr10	70747637	70747787	+	12.2	0	Intergenic	-91749	NR_045292	D630013N20Rik
	chr2-1149	chr2	64971234	64971384	+	12.2	0	intron (NM_016719, intron 2 of 13)	51457	NM_016719	Grb14
	chr15-578	chr15	55648466	55648616	+	12.2	0	intron (NM_016667, intron 4 of 6)	91133	NM_001168250	Mtbp
	chr13-535	chr13	95831912	95832062	+	12.2	0	intron (NM_027711, intron 2 of 35)	59935	NM_027711	Iqgap2
	chr1-1141	chr1	179058116	179058266	+	12.2	0	intron (NM_027188, intron 8 of 11)	459812	NM_027188	Smyd3
	chr4-283	chr4	63710493	63710643	+	12.2	0	Intergenic	34545	NM_177371	Tnfsf15
	chr10-427	chr10	29893240	29893390	+	12.2	0	Intergenic	307225	NM_001109747	Cenpw
	chr13-614	chr13	52025292	52025442	+	12.2	0	Intergenic	-71374	NR_045061	4921525O09Rik
	chr4-303	chr4	35004580	35004730	+	12.2	0	intron (NM_178061, intron 2 of 3)	-93174	NR_040652	Platr9
	chr11-745	chr11	44150451	44150601	+	12.2	0	Intergenic	-249289	NM_001284381	Adra1b
	chr1-1021	chr1	143702761	143702911	+	12.2	0	promoter-TSS (NM_145991)	57	NM_145991	Cdc73
	chr16-579	chr16	4045645	4045795	+	12.2	0	intron (NM_026508, intron 13 of 17)	8575	NM_010061	Dnase1
	chr16-560	chr16	24205614	24205764	+	12.2	0	Intergenic	-187661	NM_178665	Lpp
	chr5-744	chr5	67454512	67454662	+	11.9	0	Intergenic	-9311	NR_110363	C330024D21Rik
	chr11-725	chr11	109767254	109767404	+	11.9	0	Intergenic	-45073	NM_153782	Fam20a
	chr5-706	chr5	65020074	65020224	+	11.9	0	intron (NM_026667, intron 7 of 13)	49831	NR_030577	Mir574
	chr2-1090	chr2	48480949	48481099	+	11.9	0	Intergenic	-333085	NM_007396	Acvr2a
	chr9-621	chr9	102946486	102946636	+	11.9	0	Intergenic	-61928	NM_033314	Slco2a1
	chr15-690	chr15	90837455	90837605	+	11.9	0	RLTR19|LTR|ERVK	60946	NR_033583	Spn-ps
	chr19-469	chr19	59229673	59229823	+	11.9	0	intron (NM_207261, intron 2 of 2)	10100	NM_207261	Kcnk18
	chr19-464	chr19	52380484	52380634	+	11.9	0	Intergenic	116262	NM_008386	Ins1
	chr7-778	chr7	84779286	84779436	+	11.9	0	Intergenic	-74210	NM_146415	Olfr291
	chr8-845	chr8	72552950	72553100	+	11.9	0	ORR1D2-int|LTR|ERVL-MaLR	-4715	NM_027485	Med26
	chr6-903	chr6	131407059	131407209	+	11.9	0	LTR33|LTR|ERVL	-18684	NM_011733	Ybx3
	chr19-439	chr19	41097180	41097330	+	11.9	0	intron (NM_011904, intron 15 of 20)	-20142	NM_153520	Opalin
	chr13-648	chr13	63066753	63066903	+	11.9	0	intron (NM_001289926, intron 4 of 15)	101935	NM_001289924	2010111I01Rik
	chr14-388	chr14	118567994	118568144	+	11.9	0	intron (NM_001033336, intron 19 of 30)	24403	NR_105815	Mir6391
	chr8-861	chr8	125957594	125957744	+	11.9	0	Intergenic	-37433	NM_008430	Kcnk1
	chr1-1015	chr1	119617957	119618107	+	11.9	0	ORR1D1|LTR|ERVL-MaLR	30968	NM_001113416	Epb41l5
	chr7-703	chr7	66136372	66136522	+	11.9	0	intron (NM_001081163, intron 2 of 2)	26932	NM_001081163	Chsy1
	chr13-685	chr13	47225237	47225387	+	11.9	0	intron (NM_001170643, intron 3 of 7)	31309	NM_001170643	Rnf144b
	chr10-507	chr10	81643652	81643802	+	11.9	0	exon (NM_027480, exon 17 of 20)	-5342	NM_001142963	Gm10778
	chr3-1176	chr3	99887786	99887936	+	11.9	0	intron (NM_028892, intron 1 of 48)	2444	NM_028892	Spag17
	chr7-561	chr7	75361129	75361279	+	11.9	0	RLTR30|LTR|ERV1	-51942	NM_153579	Sv2b
	chr6-845	chr6	108249105	108249255	+	11.9	0	intron (NM_010585, intron 4 of 61)	36084	NM_010585	Itpr1
	chr1-1112	chr1	105184563	105184713	+	11.9	0	Intergenic	172072	NM_178779	Rnf152
	chr4-387	chr4	57839494	57839644	+	11.9	0	intron (NM_001304544, intron 6 of 8)	-5679	NM_009649	Akap2
	chr2-1277	chr2	135092880	135093030	+	11.9	0	intron (NM_019677, intron 3 of 32)	122661	NR_040517	4930545L23Rik
	chr14-354	chr14	27145207	27145357	+	11.9	0	intron (NM_001289686, intron 1 of 12)	1289	NM_001289686	Arhgef3
	chr1-977	chr1	157069544	157069694	+	11.9	0	Intergenic	39031	NM_001305059	Tex35
	chr7-555	chr7	40276254	40276404	+	11.9	0	Intergenic	-398408	NR_045504	4933402C06Rik
	chr16-607	chr16	57453174	57453324	+	11.9	0	intron (NM_001040397, intron 1 of 4)	-95993	NM_001177871	Filip1l
	chr2-1169	chr2	128552127	128552277	+	11.9	0	Intergenic	-40139	NM_001310641	Spdye4c
	chr16-633	chr16	42441004	42441154	+	11.9	0	Intergenic	-100428	NM_008083	Gap43
	chr16-666	chr16	57386474	57386624	+	11.9	0	ORR1F|LTR|ERVL-MaLR	33272	NM_001040397	Filip1l
	chr9-544	chr9	27026781	27026931	+	11.9	0	intron (NM_178027, intron 1 of 5)	3238	NM_178027	Vps26b
	chr8-818	chr8	110793021	110793171	+	11.9	0	intron (NM_029646, intron 1 of 7)	12828	NM_029646	Il34
	chr10-493	chr10	37714465	37714615	+	11.9	0	ORR1D1|LTR|ERVL-MaLR	-461234	NR_131035	4930591E09Rik
	chr13-636	chr13	15666232	15666382	+	11.9	0	intron (NM_008130, intron 10 of 14)	136323	NR_045507	4933412O06Rik
	chr8-837	chr8	26914280	26914430	+	11.9	0	Intergenic	-62981	NM_001101502	Zfp703
	chr16-613	chr16	94350016	94350166	+	11.9	0	Intergenic	20239	NM_001159619	Pigp
	chr11-774	chr11	118983184	118983334	+	11.9	0	Intergenic	-4929	NM_001030291	Enpp7
	chr10-528	chr10	20040219	20040369	+	11.9	0	intron (NM_008580, intron 7 of 29)	105768	NM_008580	Map3k5
	chr11-650	chr11	18905498	18905648	+	11.9	0	intron (NM_001193271, intron 9 of 12)	113396	NM_001193271	Meis1
	chr11-741	chr11	16790093	16790243	+	11.9	0	intron (NM_207655, intron 1 of 27)	37965	NM_007912	Egfr
	chr14-317	chr14	48260063	48260213	+	11.9	0	3' UTR (NM_033602, exon 6 of 6)	61422	NR_003630	Gm6498
	chr9-587	chr9	92249579	92249729	+	11.9	0	promoter-TSS (NM_011636)	-540	NM_011636	Plscr1
	chr7-634	chr7	89338713	89338863	+	11.9	0	promoter-TSS (NM_028343)	-1	NM_028343	Tmem135
	chr5-682	chr5	108668983	108669133	+	11.9	0	TTS (NM_001310692)	5738	NM_001310692	Slc26a1
	chr13-657	chr13	92990321	92990471	+	11.9	0	Intergenic	-82908	NR_036451	Gm4814
	chr1-967	chr1	107389967	107390117	+	11.9	0	Intergenic	27728	NM_025867	Serpinb11
	chr13-623	chr13	73751424	73751574	+	11.9	0	RLTR28|LTR|ERVL	-12198	NM_011390	Slc12a7
	chr10-465	chr10	45894478	45894628	+	11.9	0	Intergenic	86849	NR_040624	D030045P18Rik
	chr14-422	chr14	118706445	118706595	+	11.9	0	promoter-TSS (NM_001163676)	-301	NM_001033336	Abcc4
	chr18-182	chr18	70660547	70660697	+	11.9	0	Intergenic	92330	NM_010773	Mbd2
	chr15-693	chr15	100637127	100637277	+	11.9	0	promoter-TSS (NM_174992)	-262	NM_001033872	Smagp
	chr17-599	chr17	78241379	78241529	+	11.9	0	intron (NM_015800, intron 2 of 16)	41206	NM_015800	Crim1
	chr10-491	chr10	31528686	31528836	+	11.9	0	intron (NM_001146349, intron 2 of 5)	80964	NM_001146349	Rnf217
	chr14-323	chr14	73382837	73382987	+	11.9	0	intron (NM_008410, intron 1 of 5)	2359	NM_008410	Itm2b
	chr15-598	chr15	35748432	35748582	+	11.9	0	intron (NM_177151, intron 35 of 61)	-87460	NR_030606	Mir875
	chr3-1047	chr3	36777998	36778148	+	11.9	0	Intergenic	-85033	NM_172679	4932438A13Rik
	chr13-607	chr13	26930969	26931119	+	11.9	0	Intergenic	79301	NR_039552	Mir3970
	chr2-1253	chr2	68985708	68985858	+	11.9	0	intron (NM_172856, intron 3 of 9)	124342	NM_001347161	Cers6
	chr8-863	chr8	12754334	12754484	+	11.9	0	Intergenic	-2607	NM_015804	Atp11a
	chr13-584	chr13	52183592	52183742	+	11.9	0	Intergenic	86926	NR_045061	4921525O09Rik
	chr17-642	chr17	43171195	43171345	+	11.9	0	Intergenic	-12979	NR_045153	E130008D07Rik
	chr11-757	chr11	80719045	80719195	+	11.9	0	MLT1J1|LTR|ERVL-MaLR	60905	NM_177390	Myo1d
	chr1-1012	chr1	86858920	86859070	+	11.9	0	intron (NM_153530, intron 8 of 20)	155191	NM_001172157	Dis3l2
	chr4-332	chr4	34844198	34844348	+	11.9	0	L1_Rod|LINE|L1	38675	NM_013889	Zfp292
	chr13-655	chr13	76180529	76180679	+	11.9	0	BGLII|LTR|ERVK	81870	NM_001081352	Ttc37
	chr2-1151	chr2	66200322	66200472	+	11.9	0	ORR1D1|LTR|ERVL-MaLR	56220	NM_001047604	Ttc21b
	chr16-601	chr16	31165975	31166125	+	11.9	0	intron (NM_030138, intron 1 of 22)	35188	NM_030138	Acap2
	chr6-721	chr6	71185297	71185447	+	11.9	0	Intergenic	-14516	NM_017399	Fabp1
	chr3-1187	chr3	118565168	118565318	+	11.9	0	intron (NM_170778, intron 1 of 22)	3065	NM_170778	Dpyd
	chr1-1063	chr1	150907756	150907906	+	11.9	0	intron (NM_001024720, intron 1 of 106)	85604	NM_001024720	Hmcn1
	chr3-1114	chr3	82377104	82377254	+	11.9	0	intron (NM_001081230, intron 7 of 13)	19107	NM_001081230	Map9
	chr11-685	chr11	115965832	115965982	+	11.9	0	TTS (NM_020483)	-8818	NM_001005608	Itgb4
	chr1-1131	chr1	170190493	170190643	+	11.9	0	MTEa|LTR|ERVL-MaLR	-15604	NM_001305045	Uap1
	chr10-535	chr10	62713599	62713749	+	11.9	0	intron (NM_001033260, intron 1 of 3)	12425	NM_001033260	Stox1
	chr1-1054	chr1	88464649	88464799	+	11.9	0	Intergenic	45342	NM_008132	Glrp1
	chr14-411	chr14	57890332	57890482	+	11.9	0	promoter-TSS (NM_029492)	-145	NM_029492	Zdhhc20
	chr3-1148	chr3	13633682	13633832	+	11.9	0	intron (NR_040598, intron 3 of 3)	19108	NR_040598	4930539N22Rik
	chr14-446	chr14	117484720	117484870	+	11.9	0	intron (NM_001079844, intron 3 of 9)	469052	NR_105747	Mir6239
	chr12-369	chr12	69556702	69556852	+	11.9	0	Intergenic	26251	NM_001033236	Vcpkmt
	chr3-1098	chr3	21506988	21507138	+	11.9	0	MERV1_I-int|LTR|ERV1	-569589	NM_030732	Tbl1xr1
	chr7-662	chr7	46919900	46920050	+	11.9	0	promoter-TSS (NM_021884)	-45	NM_021884	Tsg101
	chr10-457	chr10	32984952	32985102	+	11.9	0	RLTR1E_MM|LTR|ERV1	-95112	NM_001025286	Nkain2
	chr18-279	chr18	83464581	83464731	+	11.9	0	Intergenic	-138772	NR_045361	4921531P14Rik
	chr16-663	chr16	49859072	49859222	+	11.9	0	intron (NM_010581, intron 1 of 9)	3493	NM_010581	Cd47
	chr15-535	chr15	27617255	27617405	+	11.9	0	intron (NM_001013792, intron 3 of 6)	13363	NM_001013792	Otulin
	chr18-289	chr18	45743793	45743943	+	11.9	0	intron (NR_040342, intron 3 of 3)	183714	NM_080465	Kcnn2
	chr4-431	chr4	149680874	149681024	+	11.9	0	intron (NM_001029837, intron 1 of 23)	-4860	NM_001164051	Pik3cd
	chrX-131	chrX	134059104	134059254	+	11.9	0	promoter-TSS (NM_133196)	3	NM_133196	Cstf2
	chr3-1059	chr3	58582006	58582156	+	11.9	0	intron (NM_001040396, intron 1 of 5)	5423	NM_001040396	Selenot
	chr12-419	chr12	111741387	111741537	+	11.9	0	intron (NM_001163388, intron 4 of 5)	-17387	NM_008450	Klc1
	chr1-895	chr1	189777271	189777421	+	11.9	0	intron (NM_008976, intron 1 of 18)	49078	NM_008976	Ptpn14
	chr9-529	chr9	80057819	80057969	+	11.9	0	MLT1D|LTR|ERVL-MaLR	-9009	NM_001311110	Senp6
	chr10-514	chr10	100030511	100030661	+	11.9	0	intron (NM_001347156, intron 1 of 8)	14765	NM_013598	Kitl
	chr2-1164	chr2	115876007	115876157	+	11.9	0	intron (NM_001346047, intron 10 of 13)	188537	NM_001346044	Meis2
	chr19-466	chr19	55826315	55826465	+	11.9	0	intron (NR_138565, intron 4 of 15)	-68931	NM_001142924	Tcf7l2
	chr12-382	chr12	52779169	52779319	+	11.9	0	intron (NM_198111, intron 1 of 13)	79861	NM_198111	Akap6
	chr19-414	chr19	42539721	42539871	+	11.9	0	intron (NM_177464, intron 1 of 6)	20991	NM_177464	R3hcc1l
	chr2-1414	chr2	79350741	79350891	+	11.9	0	intron (NM_001048176, intron 5 of 12)	78172	NM_001048176	Cerkl
	chr19-457	chr19	34171298	34171448	+	11.9	0	Intergenic	-5332	NM_024204	Ankrd22
	chr15-599	chr15	39924648	39924798	+	11.9	0	intron (NM_172814, intron 1 of 6)	19034	NM_172814	Lrp12
	chr17-653	chr17	71183425	71183575	+	11.9	0	promoter-TSS (NM_022882)	-478	NM_022882	Lpin2
	chr16-590	chr16	23307816	23307966	+	11.9	0	intron (NM_001252506, intron 1 of 6)	17421	NM_001252506	St6gal1
	chr18-251	chr18	32745557	32745707	+	11.9	0	L1_Rod|LINE|L1	-69751	NM_021367	Tslp
	chr2-1213	chr2	96505221	96505371	+	11.9	0	intron (NM_001289743, intron 1 of 6)	187127	NM_001289743	Lrrc4c
	chrX-119	chrX	56598982	56599132	+	11.9	0	Intergenic	-1138	NM_146234	Mmgt1
	chr13-651	chr13	73511343	73511493	+	11.9	0	intron (NM_145376, intron 12 of 13)	-25329	NM_010020	Slc6a3
	chr10-413	chr10	75703067	75703217	+	11.9	0	intron (NM_172549, intron 26 of 36)	-59134	NM_027890	Susd2
	chr2-1245	chr2	30985360	30985510	+	11.9	0	intron (NM_028846, intron 1 of 24)	3156	NM_028846	Usp20
	chr2-1275	chr2	132278605	132278755	+	11.9	0	intron (NM_138651, intron 1 of 12)	-7259	NM_001291039	Cds2
	chr15-625	chr15	42521257	42521407	+	11.9	0	intron (NM_009640, intron 2 of 8)	155645	NM_001286062	Angpt1
	chr5-758	chr5	134957474	134957624	+	11.9	0	Intergenic	-10615	NM_009903	Cldn4
	chr2-1191	chr2	18494936	18495086	+	11.9	0	RLTR13B4|LTR|ERVK	-102181	NM_007869	Dnajc1
	chr5-711	chr5	76906604	76906754	+	11.9	0	RLTR23|LTR|ERV1	-1165	NM_173765	Aasdh
	chr19-454	chr19	17385529	17385679	+	11.9	0	Intergenic	-8439	NM_019437	Rfk
	chr1-1020	chr1	143596954	143597104	+	11.9	0	Tigger6a|DNA|TcMar-Tigger	-43668	NM_020025	B3galt2
	chr16-623	chr16	26728228	26728378	+	11.9	0	intron (NR_105063, intron 2 of 2)	27199	NR_105063	Gm20319
	chr8-886	chr8	77510750	77510900	+	11.9	0	intron (NM_030113, intron 1 of 22)	-6231	NR_028125	0610038B21Rik
	chr9-577	chr9	43748484	43748634	+	11.9	0	intron (NM_021424, intron 1 of 5)	3983	NM_021424	Nectin1
	chr3-1104	chr3	40687918	40688068	+	11.9	0	intron (NM_175515, intron 9 of 15)	-20878	NM_178386	Slc25a31
	chr9-456	chr9	33663182	33663332	+	11.9	0	Tigger5b|DNA|TcMar-Tigger	-379114	NR_040744	7630403G23Rik
	chr9-488	chr9	37045702	37045852	+	11.9	0	intron (NM_001029838, intron 2 of 12)	101545	NM_148950	Pknox2
	chr9-566	chr9	108490556	108490706	+	11.9	0	promoter-TSS (NM_001168373)	-45	NM_001168372	Usp19
	chr17-541	chr17	83120839	83120989	+	11.9	0	MLT1F|LTR|ERVL-MaLR	-42689	NR_045094	Gm19689
	chr1-973	chr1	136469570	136469720	+	11.9	0	intron (NM_001287179, intron 1 of 28)	1797	NM_001287179	Kif14
	chr11-621	chr11	4084567	4084717	+	11.9	0	ORR1F|LTR|ERVL-MaLR	10789	NM_026443	Mtfp1
	chr7-639	chr7	126928730	126928880	+	11.9	0	promoter-TSS (NM_172747)	-74	NM_172747	Kctd13
	chr4-407	chr4	34582103	34582253	+	11.9	0	MTA_Mm|LTR|ERVL-MaLR	31563	NM_001007589	Akirin2
	chr1-1039	chr1	15959646	15959796	+	11.9	0	Intergenic	-66999	NM_001033288	Sbspon
	chr3-1153	chr3	30418895	30419045	+	11.9	0	intron (NM_021442, intron 1 of 2)	90517	NM_021442	Mecom
	chr3-1190	chr3	132416272	132416422	+	11.9	0	Intergenic	-213844	NM_001270430	Gimd1
	chr5-671	chr5	44631026	44631176	+	11.9	0	MIRc|SINE|MIR	168645	NM_001347349	Ldb2
	chr7-667	chr7	68006762	68006912	+	11.9	0	intron (NM_010513, intron 2 of 20)	54580	NM_010513	Igf1r
	chr7-587	chr7	64841315	64841465	+	11.9	0	intron (NM_183087, intron 3 of 9)	31650	NM_023239	Ndnl2
	chr10-501	chr10	61928670	61928820	+	11.9	0	intron (NM_001304757, intron 2 of 37)	50363	NM_001304757	Col13a1
	chr6-840	chr6	82886914	82887064	+	11.9	0	RMER1C|Other|Other	-5136	NR_040520	2310069B03Rik
	chr3-1245	chr3	122494862	122495012	+	11.9	0	intron (NM_013867, intron 3 of 11)	46744	NR_106117	Mir7657
	chr3-1166	chr3	68692531	68692681	+	11.9	0	intron (NM_001159424, intron 3 of 7)	1182	NM_008351	Il12a
	chr17-616	chr17	43234676	43234826	+	11.9	0	Intergenic	-35596	NM_133776	Adgrf1
	chr9-516	chr9	36797302	36797452	+	11.5	0	promoter-TSS (NM_001199494)	16	NM_001199494	Ei24
	chr12-403	chr12	54198422	54198572	+	11.5	0	intron (NM_028133, intron 1 of 4)	5377	NM_028133	Egln3
	chr2-1162	chr2	108400723	108400873	+	11.5	0	Intergenic	877492	NM_029790	Mettl15
	chr8-918	chr8	46991077	46991227	+	11.5	0	MLT1B|LTR|ERVL-MaLR	4265	NM_177304	Enpp6
	chr5-831	chr5	64391472	64391622	+	11.5	0	Intergenic	76395	NR_040681	1700027F09Rik
	chr1-1111	chr1	102186157	102186307	+	11.5	0	Intergenic	1030464	NR_037989	Gm20268
	chr9-563	chr9	96771342	96771492	+	11.5	0	intron (NR_102295, intron 2 of 2)	5855	NR_102296	C430002N11Rik
	chr1-1176	chr1	125389862	125390012	+	11.5	0	Intergenic	45790	NM_023735	Actr3
	chr11-746	chr11	47252504	47252654	+	11.5	0	intron (NM_011891, intron 2 of 7)	126723	NM_011891	Sgcd
	chr1-1094	chr1	54922363	54922513	+	11.5	0	MIR|SINE|MIR	3949	NM_001081433	Ankrd44
	chr1-1086	chr1	33352575	33352725	+	11.5	0	MTD|LTR|ERVL-MaLR	317144	NM_008922	Prim2
	chr10-488	chr10	26238685	26238835	+	11.5	0	intron (NM_001115154, intron 4 of 10)	9053	NM_001115154	Samd3
	chr6-820	chr6	18851202	18851352	+	11.5	0	intron (NM_133939, intron 2 of 3)	2642	NM_133939	Lsm8
	chr18-304	chr18	35928311	35928461	+	11.5	0	MIR|SINE|MIR	-36444	NM_028707	Psd2
	chr1-1050	chr1	70078897	70079047	+	11.5	0	intron (NM_029160, intron 11 of 16)	127357	NM_025728	Spag16
	chr8-968	chr8	35224206	35224356	+	11.5	0	Intergenic	-151460	NM_177741	Ppp1r3b
	chr16-678	chr16	10711910	10712060	+	11.5	0	intron (NM_001204229, intron 21 of 22)	73551	NM_009896	Socs1
	chr4-404	chr4	4585230	4585380	+	11.5	0	Intergenic	-55847	NM_001277919	Gm11780
	chr1-1007	chr1	77265707	77265857	+	11.5	0	Intergenic	230986	NR_105770	Mir6352
	chr1-1234	chr1	93507429	93507579	+	11.5	0	intron (NM_001159718, intron 11 of 11)	-4600	NM_145519	Farp2
	chr6-829	chr6	41560261	41560411	+	11.5	0	Intergenic	38560	NM_009430	Prss2
	chr3-1208	chr3	27878892	27879042	+	11.5	0	intron (NM_001164437, intron 3 of 3)	17401	NM_001164437	Tmem212
	chr8-835	chr8	24568852	24569002	+	11.5	0	intron (NM_145949, intron 1 of 9)	7406	NM_145949	Ido2
	chr9-602	chr9	35335989	35336139	+	11.5	0	Intergenic	54959	NR_040715	4933422A05Rik
	chr9-588	chr9	97102481	97102631	+	11.5	0	L1ME1|LINE|L1	8485	NM_138756	Slc25a36
	chr17-657	chr17	79892003	79892153	+	11.5	0	intron (NM_019717, intron 1 of 12)	4045	NM_178050	Atl2
	chr6-955	chr6	137030771	137030921	+	11.5	0	Intergenic	76323	NM_023898	Pde6h
	chr8-955	chr8	126609513	126609663	+	11.5	0	Intergenic	-16152	NM_001164598	Irf2bp2
	chr6-944	chr6	122819836	122819986	+	11.5	0	promoter-TSS (NM_021899)	-273	NM_021899	Foxj2
	chr18-259	chr18	74814863	74815013	+	11.5	0	MTEa|LTR|ERVL-MaLR	35726	NM_177470	Acaa2
	chr13-646	chr13	49016552	49016702	+	11.5	0	Intergenic	48515	NR_015601	Fam120aos
	chr11-808	chr11	107648863	107649013	+	11.5	0	L1MB3|LINE|L1	11216	NR_105897	Mir6932
	chr2-1209	chr2	75607980	75608130	+	11.5	0	Intergenic	-51204	NM_146130	Hnrnpa3
	chr17-716	chr17	66874983	66875133	+	11.5	0	intron (NM_008984, intron 14 of 30)	151177	NR_049205	Mir5709
	chr3-1202	chr3	158257323	158257473	+	11.5	0	intron (NM_001081358, intron 8 of 27)	220716	NM_001289524	Lrrc40
	chr14-414	chr14	70302989	70303139	+	11.5	0	TTS (NM_144808)	-13567	NM_001304992	Ppp3cc
	chr4-424	chr4	121098188	121098338	+	11.5	0	promoter-TSS (NM_172700)	-20	NM_172700	Zmpste24
	chr1-1148	chr1	21530973	21531123	+	11.5	0	intron (NM_001310477, intron 3 of 12)	147492	NM_001113187	Khdc1b
	chr10-583	chr10	95989571	95989721	+	11.5	0	exon (NM_001001932, exon 3 of 29)	48983	NM_001001932	Eea1
	chr1-1103	chr1	83252091	83252241	+	11.5	0	Intergenic	92404	NM_027725	Daw1
	chr1-1235	chr1	94327568	94327718	+	11.5	0	Intergenic	-275090	NM_008798	Pdcd1
	chr14-392	chr14	20442323	20442473	+	11.5	0	intron (NM_029698, intron 5 of 28)	9827	NM_001163638	Cfap70
	chr10-517	chr10	116073176	116073326	+	11.5	0	intron (NM_011217, intron 2 of 13)	40666	NM_001161855	4933416C03Rik
	chr6-839	chr6	81473187	81473337	+	11.5	0	Intergenic	422401	NR_106091	Mir7232
	chr5-715	chr5	103749890	103750040	+	11.5	0	Intergenic	-4197	NM_133919	Aff1
	chr13-635	chr13	15052711	15052861	+	11.5	0	Intergenic	-410937	NM_008130	Gli3
	chr7-633	chr7	84749877	84750027	+	11.5	0	L2b|LINE|L2	60312	NR_038175	2610206C17Rik
	chr3-1218	chr3	52391443	52391593	+	11.5	0	Intergenic	123181	NM_019739	Foxo1
	chr8-887	chr8	78508874	78509024	+	11.5	0	promoter-TSS (NM_001282108)	-21	NM_009033	Rbmxl1
	chr3-1255	chr3	144110808	144110958	+	11.5	0	Intergenic	91449	NM_001161770	Lmo4
	chr5-789	chr5	100270709	100270859	+	11.5	0	L1MC4|LINE|L1	60092	NR_040679	2310034O05Rik
	chr3-1247	chr3	125449626	125449776	+	11.5	0	intron (NM_022565, intron 2 of 13)	45610	NM_022565	Ndst4
	chr19-510	chr19	41654418	41654568	+	11.5	0	MLT1A0|LTR|ERVL-MaLR	65842	NR_106166	Mir8091
	chr8-882	chr8	68188044	68188194	+	11.5	0	Intergenic	-88409	NM_028182	Sh2d4a
	chr1-1127	chr1	162740529	162740679	+	11.5	0	promoter-TSS (NM_001081290)	-48	NM_001081290	Prrc2c
	chr5-743	chr5	64450898	64451048	+	11.5	0	Intergenic	16969	NR_040681	1700027F09Rik
	chr17-610	chr17	29394187	29394337	+	11.5	0	Intergenic	33348	NM_001159538	Fgd2
	chr17-627	chr17	86905447	86905597	+	11.5	0	Intergenic	-11826	NM_001277980	Tmem247
	chr3-1132	chr3	123615356	123615506	+	11.5	0	intron (NR_121616, intron 4 of 13)	4019	NM_001293682	Ndst3
	chr15-610	chr15	73557227	73557377	+	11.5	0	intron (NM_001081066, intron 15 of 22)	39224	NM_001168255	Slc45a4
	chr2-1206	chr2	72229072	72229222	+	11.5	0	intron (NM_001204165, intron 23 of 30)	-56490	NM_023057	Map3k20
	chr13-601	chr13	117410065	117410215	+	11.5	0	Intergenic	189567	NM_010330	Emb
	chr8-915	chr8	36117062	36117212	+	11.5	0	intron (NM_172911, intron 3 of 5)	22309	NM_172911	Prag1
	chr1-1128	chr1	163308737	163308887	+	11.5	0	intron (NM_001025570, intron 1 of 2)	4838	NM_011127	Prrx1
	chr5-735	chr5	16059384	16059534	+	11.5	0	intron (NM_001110846, intron 3 of 37)	124768	NM_001110844	Cacna2d1
	chr10-570	chr10	59616229	59616379	+	11.5	0	CpG	388	NM_001033259	Mcu
	chr5-755	chr5	129729283	129729433	+	11.5	0	intron (NM_008095, intron 1 of 9)	4283	NM_008095	Gbas
	chr8-890	chr8	92870384	92870534	+	11.5	0	intron (NM_173014, intron 3 of 13)	15109	NM_173014	Lpcat2
	chr17-668	chr17	29312300	29312450	+	11.5	0	Intergenic	-6507	NM_023734	Pi16
	chr3-1248	chr3	127075576	127075726	+	11.5	0	intron (NM_001327938, intron 4 of 47)	-77199	NM_178655	Ank2
	chr16-668	chr16	84814072	84814222	+	11.5	0	intron (NM_023844, intron 5 of 9)	20851	NM_001302216	Atp5j
	chr4-443	chr4	44741768	44741918	+	11.5	0	L1M4|LINE|L1	-14716	NM_138590	Zcchc7
	chr13-563	chr13	94211770	94211920	+	11.5	0	intron (NM_001346609, intron 6 of 8)	73436	NM_029153	Scamp1
	chr4-389	chr4	97157093	97157243	+	11.5	0	Intergenic	-372008	NM_001081284	Gm12695
	chr6-950	chr6	128975117	128975267	+	11.5	0	promoter-TSS (NR_045009)	-163	NR_045009	Gm15987
	chr19-499	chr19	7083033	7083183	+	11.5	0	intron (NM_134147, intron 3 of 10)	22621	NM_201411	Flrt1
	chr19-443	chr19	52632595	52632745	+	11.5	0	Intergenic	-290511	NR_030678	AA387883
	chr6-917	chr6	37254387	37254537	+	11.5	0	intron (NM_001347104, intron 1 of 32)	45514	NM_001081206	Dgki
	chr19-502	chr19	18334644	18334794	+	11.5	0	Intergenic	297094	NM_017375	Ostf1
	chr9-600	chr9	31963114	31963264	+	11.5	0	L1M4b|LINE|L1	-49904	NM_013800	Barx2
	chr3-1397	chr3	61601192	61601342	+	11.5	0	MER5B|DNA|hAT-Charlie	236760	NM_028712	Rap2b
	chr6-921	chr6	41559562	41559712	+	11.5	0	Intergenic	37861	NM_009430	Prss2
	chr4-450	chr4	102521457	102521607	+	11.5	0	intron (NM_019840, intron 5 of 14)	-48528	NM_001177980	Pde4b
	chr14-442	chr14	102749071	102749221	+	11.5	0	L2c|LINE|L2	233486	NR_039592	Mir5130
	chr4-410	chr4	53231988	53232138	+	11.5	0	MLT1D|LTR|ERVL-MaLR	-14133	NR_040665	4930522O17Rik
[truncated: 2,594 more rows]
