# Supplementary material for: Negative correlation of single-cell PAX3:FOXO1 expression with tumorigenicity in rhabdomyosarcoma
Source: Life Sci Alliance. 2021 Jun 29;4(9):e202001002. doi: 10.26508/lsa.202001002 (PMC8321661; doi:10.26508/lsa.202001002)
Supplement: Supplementary file 7 [file LSA-2020-01002_TableS7.xlsx]

## Sheet: Table S7
	Table S7. Pathways enriched among genes with stronger ATAC-Seq signals in YFPlow/ P3Flow cells.
	Gene Set Name	p-value	FDR q-value	number of genes	Description
	GO_CELL_MOTILITY	2.5e-08	9.48e-05	21	JAG1, HBEGF, IL1A, FLRT3, POSTN, CCL2, CD44, ADGRB1, JAM3, FLT1, MARVELD3, PHACTR1, TNS3,IL1RN, IL12A, PLET1, CCL1, TSPO, ZSWIM6, SPATA13, FMNL3
	GO_CELL_JUNCTION	3.69e-08	0.000104	18	JAG1, FLRT3, CYTH3, CACNG2, NECTIN3, CD44, ADGRB1, JAM3, FLT1, MARVELD3, PHACTR1, TNS3, IGSF5, YWHAZ, SLC5A7, PARD6G, C4orf19, GAD2
	GO_LOCOMOTION	4.12e-08	0.000104	22	JAG1, HBEGF, IL1A, ARRDC3, FLRT3, POSTN, CCL2, CD44, ADGRB1, JAM3, FLT1, MARVELD3, PHACTR1, TNS3, IL1RN, IL12A, PLET1, CCL1, TSPO, ZSWIM6, SPATA13, FMNL3
	GO_GROWTH_FACTOR_RECEPTOR_BINDING	1.21e-07	0.000219	7	HBEGF, IL1A, FLRT3, IL1RN, IL12A, KL, ESM1
	GO_BIOLOGICAL_ADHESION	1.25e-07	0.000219	18	JAG1, ADAM12, CYLD, FLRT3, POSTN, CYTH3, PCDH18, CCL2, NECTIN3, CD44, ADGRB1, JAM3, IL1RN, IL12A, PLET1, IGSF5, MBP, CBFB
	GO_SIGNAL_TRANSDUCTION_BY_PROTEIN_PHOSPHORYLATION	1.3e-07	0.000219	15	INHBA, TIMP3, HBEGF, IL1A, CYLD, CCL2, CD44, FLT1, MARVELD3, IL1RN, CCL1, KL, MBP, PTPN1, TPD52L1
