# Supplementary material for: Negative correlation of single-cell PAX3:FOXO1 expression with tumorigenicity in rhabdomyosarcoma
Source: Life Sci Alliance. 2021 Jun 29;4(9):e202001002. doi: 10.26508/lsa.202001002 (PMC8321661; doi:10.26508/lsa.202001002)
Supplement: Supplementary file 10 [file LSA-2020-01002_TableS10.xlsx]

## Sheet: Table S10
	Table S10. List of mouse RT-QPCR and human single cell ddQPCR primers.
	Gene	Species	Fw primer	Rev primer
	Pax3:Foxo1	mouse	5´ - AGACAGCTTTGTGCCTCCAT - 3´	5´ - CTCTTGCCTCCCTCTGGATT - 3´
	Itga8	mouse	5´ - CGAAGCCGAACTCTTTGTTATCA - 3´	5´ - GGCCTCAGTCCCTTGTTGT - 3´
	Cdh4	mouse	5´ - CAGGCCACTGACATGGAAGG - 3´	5´ - ATGATTCGGTAGACGGCGTTC - 3´
	Itga5	mouse	5´ - CTTCTCCGTGGAGTTTTACCG - 3´	5´ - GCTGTCAAATTGAATGGTGGTG - 3´
	Lama5	mouse	5´ - GCTGGCGGAGATCCCAATC - 3´	5´ - GTGTGACGTTGACCTCATTGT - 3´
	Thbs3	mouse	5´ - ATGGAGAAGCCGGAACTTTGG - 3´	5´- AGTGAGTAAAGCTGTCCGAATCT - 3´
	Efemp1	mouse	5´ - GCGCTGGTCAAGTCACAGTA - 3´	5´ - AAGCATCTGGGACAATGTCAC - 3´
	Rnd2	mouse	5´ - CGCTGCAAGATCGTAGTGGT - 3´	5´ - CAGAGGCCGGACATTGTCAT - 3´
	Gapdh	mouse	5´ - AGGTCGGTGTGAACGGATTTG - 3´	5´ - TGTAGACCATGTAGTTGAGGTCA - 3´
	Actin	mouse	5´ - CTCAGGAGGAGCAATGATCTTGAT - 3´	5´ - TACCACCATGTACCCAGGCA - 3´
	PAX3:FOXO1	human	5´ - CATGGATTTTCCAGCTATACAGAC - 3´	5´ - GTTCCTTCATTCTGCACACG - 3´
	GAPDH	human	5´ - ACAACTTTGGTATCGTGGAAGG - 3´	5´ - GCCATCACGCCACAGTTTC - 3´
